# Supplementary material for: Iron cyclopentadienone complexes derived from C2-symmetric bis-propargylic alcohols; preparation and applications to catalysis
Source: Royal Society of Chemistry journal article supplement (doi:10.1039/c5dt04610f), 2016-01-01
Supplement: c5dt04610f1.pdf [file c5dt04610f1.pdf]

*Supporting information*

**Iron cyclopentadienone complexes derived from C<sub>2</sub>-symmetric bis-propargylic alcohols; preparation and applications to catalysis.**

Roy Hodgkinson, Alessandro Del Grosso, Guy J. Clarkson and Martin Wills.

Department of Chemistry, Warwick University, Coventry, CV4 7AL, UK. +44 24 7652 3260.

Email [m.wills@warwick.ac.uk](mailto:m.wills@warwick.ac.uk)

Additional results Tables and hydride formation experiments S2

NMR spectra of complexes and intermediates S15

GC data for reduction products S82

X-ray crystallographic data S86

## Additional results Tables and hydride formation experiments.

**Table S1.** Additional results for ATH of acetophenone reduction using iron catalysts **13**, **18-21**.<sup>a</sup>

| Entry | Catalyst  | Loading /mol% | Activator | Time | T / °C | Alcohol /% | Formate / % | alcohol ee / %  | Formate ee / % |
|-------|-----------|---------------|-----------|------|--------|------------|-------------|-----------------|----------------|
| 3     | <b>18</b> | 5             | TMAO      | 24 h | 40     | 13         | 0           | 2 ( <i>S</i> )  | -              |
| 4     | <b>18</b> | 1             | TMAO      | 24 h | 40     | 0          | 0           | -               | -              |
| 5     | <b>19</b> | 5             | TMAO      | 24 h | 40     | 16         | 0           | 29 ( <i>R</i> ) | -              |
| 6     | <b>19</b> | 1             | TMAO      | 24 h | 40     | 0          | 0           | -               | -              |
| 7     | <b>20</b> | 5             | TMAO      | 24 h | 40     | 9          | 1           | 21 ( <i>R</i> ) | <sup>b</sup>   |
| 8     | <b>20</b> | 1             | TMAO      | 24 h | 40     | 0.5        | 0.5         | <sup>b</sup>    | <sup>b</sup>   |
| 9     | <b>21</b> | 5             | TMAO      | 24 h | 40     | 14         | 0           | 37 ( <i>R</i> ) | -              |
| 10    | <b>21</b> | 1             | TMAO      | 24 h | 40     | 0          | 0           | -               | -              |

a. reaction conditions; [S] = *ca.* 1 M, TMAO (1 eq. relative to complexes) unless otherwise indicated, % conversions are given and the balance is unreduced ketone. b. not determined.

**Table S2.** Effect of water on reaction in anhydrous THF using catalyst **13**.<sup>a</sup>

| Entry | Loading /mol% | Solvent                    | H <sub>2</sub> O (%) <sup>c</sup> | Conv | ee                |
|-------|---------------|----------------------------|-----------------------------------|------|-------------------|
| 1     | 1             | THF <sup>b</sup>           | 0                                 | 69.5 | 11.4 ( <i>S</i> ) |
| 2     | 1             | THF                        | 0                                 | 31   | 12.6 ( <i>S</i> ) |
| 3     | 1             | THF <sup>d</sup>           | 0                                 | 25.7 | 12.0 ( <i>S</i> ) |
| 4     | 1             | THF                        | 10                                | 46.7 | 10.0 ( <i>S</i> ) |
| 5     | 1             | THF                        | 50                                | 83.4 | 12.6 ( <i>S</i> ) |
| 6     | 1             | THF                        | 100                               | 98.7 | 11.4 ( <i>S</i> ) |
| 7     | 1             | THF/H <sub>2</sub> O (5/2) |                                   | 99.8 | 13.6 ( <i>S</i> ) |

a. Reaction conditions; 1 mol% catalyst, [S] = *ca.* 1.9 M, 30 bar H<sub>2</sub>, THF (0.7 mL) used as solvent b. “aged” THF, likely to contain water. c. relative to substrate. d. Test tube dried in oven overnight and cooled under flow of N<sub>2</sub>.

### Observation of hydride formation on treatment of complex **13** in THF/H<sub>2</sub>O (ADG231).

In a J. Young's NMR tube fitted with a *d*<sub>6</sub>-DMSO capillary, under nitrogen atmosphere, complex **13** (20 mg, 4.1×10<sup>-2</sup> mmol) was dissolved in THF (0.5 mL) and H<sub>2</sub>O (74 μl, 4.1 mmol) was added. Then the mixture was degassed by three freeze-pump-thaw cycles, and heated to 80 °C. <sup>1</sup>H NMR spectra were recorded before heating and after 3 and 19 hours at 80 °C. On heating, insoluble materials were formed and a peak at -12.10 ppm consistent with

a Fe-H species appeared. Furthermore, all the peaks broadened suggesting the formation of paramagnetic iron species.

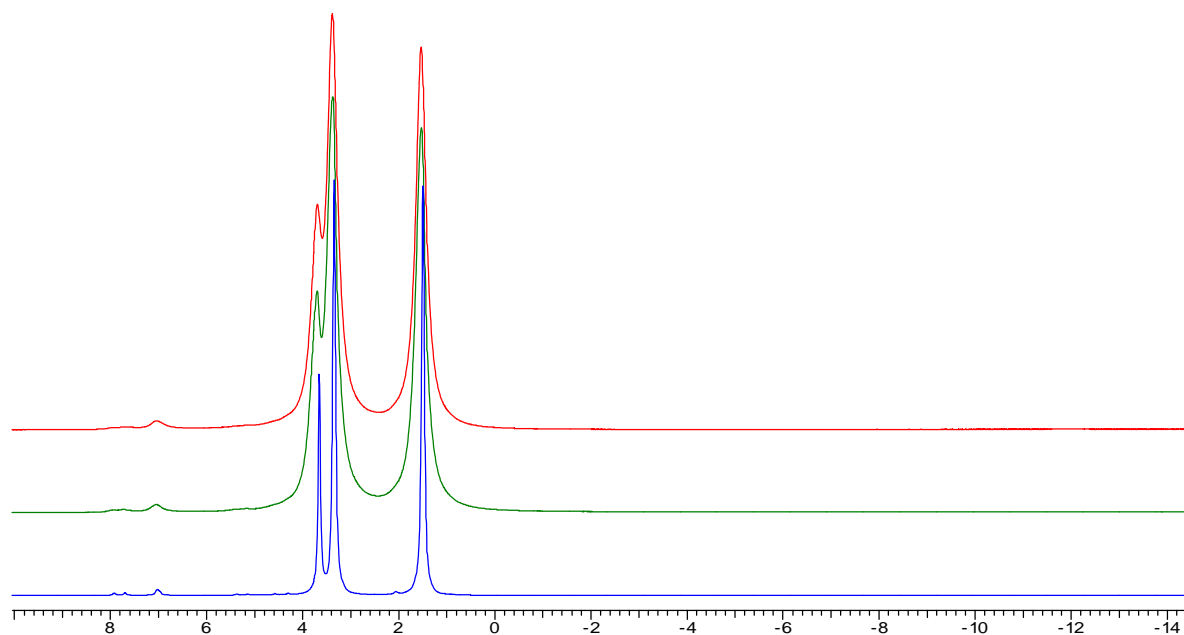

**Figure 1.**  $^1\text{H}$  NMR series of the mixture of complex **13** with  $\text{H}_2\text{O}$  in  $\text{THF}$  ( $\text{d}_6$ -DMSO capillary used to lock the signal) at room temperature (lower spectrum), 3 hours at  $80^\circ\text{C}$  (middle spectrum) and 19 hours at  $80^\circ\text{C}$  (upper spectrum).

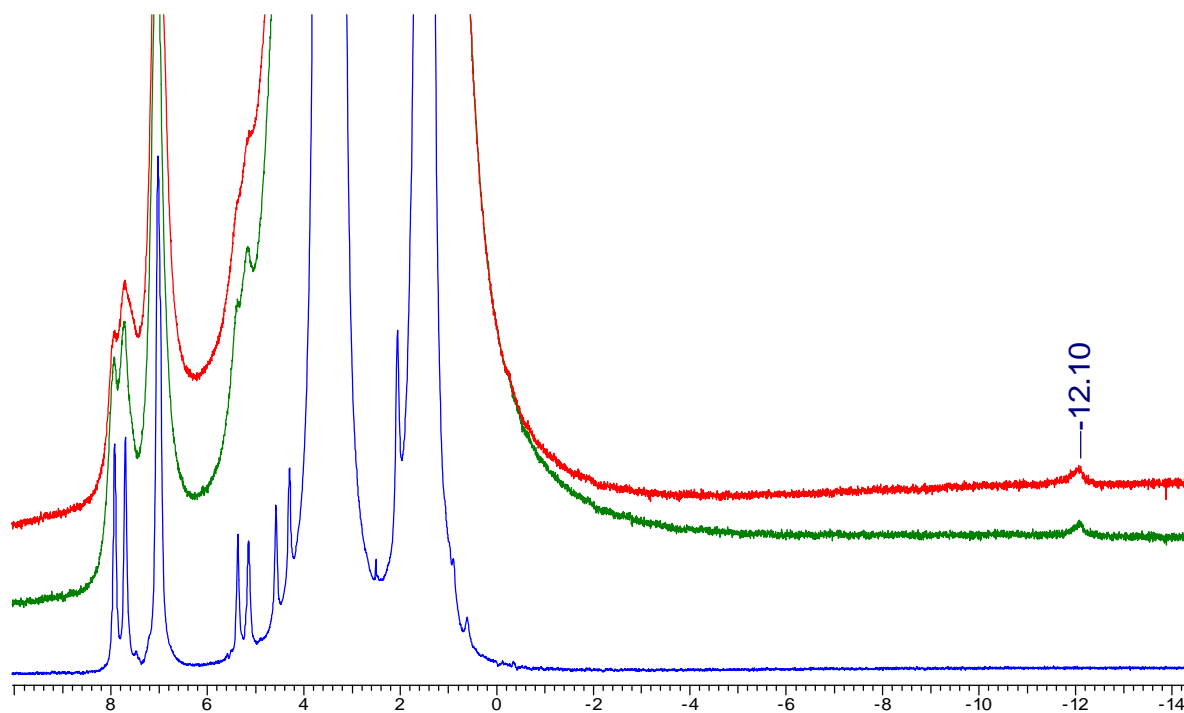

**Figure 2.** Expanded  $^1\text{H}$  NMR series of the mixture of complex **13** with  $\text{H}_2\text{O}$  in  $\text{THF}$  ( $\text{d}_6$ -DMSO capillary used to lock the signal) at room temperature (lower spectrum), 3 hours at  $80^\circ\text{C}$

°C (middle spectrum) and 19 hours at 80 °C (upper spectrum). The signals due to the complex are visible in this expanded spectrum.

**Table S3.** Effect of water on acetophenone reduction in dry toluene using catalyst **13**.<sup>a</sup>

| Entry | Loading/mol% | Additive  | H <sub>2</sub> O added/% <sup>b</sup> | Conv/% | Ee /%            |
|-------|--------------|-----------|---------------------------------------|--------|------------------|
| 1     | 1            | none      | 0                                     | 18.8   | 6.8 ( <i>S</i> ) |
| 2     | 1            | none      | 0                                     | 25.2   | 6.8 ( <i>S</i> ) |
| 3     | 1            | TMAO (1%) | 0                                     | 99.7   | 4 ( <i>S</i> )   |
| 4     | 1            | None      | 10                                    | 3.8    | 6.4 ( <i>S</i> ) |
| 5     | 1            | None      | 50                                    | 10.9   | 6.4 ( <i>S</i> ) |
| 6     | 1            | none      | 100                                   | 20.6   | 6.8 ( <i>S</i> ) |

a. Reaction conditions; 1 mol% catalyst, [S] = ca. 1.9 M, 30 bar H<sub>2</sub>, Toluene (0.7 mL) used as solvent, 80 °C, 18h. b. relative to substrate.

**Table S4.** Additional results for oxidation of 1-phenylethanol using iron catalysts **13**, **18-21**.<sup>a</sup>

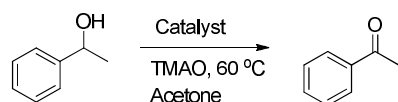

| Entry | Catalyst  | Loading / mol% | Time / h | Alcohol / % | Ketone / % | Alcohol ee / % |
|-------|-----------|----------------|----------|-------------|------------|----------------|
| 6     | <b>18</b> | 1              | 5        | 85          | 15         | 2 ( <i>R</i> ) |
| 7     | <b>18</b> | 1              | 24       | 23          | 77         | 0 ( <i>R</i> ) |
| 12    | <b>19</b> | 1              | 5        | 62          | 38         | 3 ( <i>S</i> ) |
| 13    | <b>19</b> | 1              | 24       | 36          | 64         | 6 ( <i>S</i> ) |
| 16    | <b>20</b> | 1              | 24       | 83          | 17         | 1 ( <i>S</i> ) |
| 21    | <b>21</b> | 1              | 5        | 96          | 4          | 0 ( <i>R</i> ) |
| 22    | <b>21</b> | 1              | 24       | 65          | 35         | 1 ( <i>R</i> ) |

a. Reaction conditions; 60 °C, [S] = 0.19M, acetone solvent, TMAO (1 eq. relative to complexes).

**Table S5.** Reduction of acetylcyclohexane using iron catalysts **13**, **18-21**.<sup>a</sup>

| Entry | APH/ATH | Catalyst  | Loading / mol% | T / °C | Time / h | Alcohol <sup>b</sup> / % | Ketone / % |
|-------|---------|-----------|----------------|--------|----------|--------------------------|------------|
| 1     | ATH     | <b>18</b> | 10             | 60     | 48       | 97                       | 3          |
| 2     | APH     | <b>18</b> | 1              | 60     | 72       | Trace                    | >99        |
| 3     | ATH     | <b>19</b> | 10             | 60     | 48       | 81                       | 12         |
| 4     | APH     | <b>19</b> | 1              | 60     | 72       | Trace                    | >99        |
| 5     | ATH     | <b>20</b> | 10             | 40     | 24       | 66                       | 31         |
| 6     | ATH     | <b>21</b> | 10             | 60     | 48       | 61                       | 32         |
| 7     | APH     | <b>21</b> | 1              | 60     | 72       | Trace                    | >99        |

a. Reaction conditions; ATH: 100 mg of cyclohexylmethyl ketone, 10 mol% Fe Catalyst, 10 mol% TMAO, FA/TEA 5:2, [S] = 1.5M; APH: 30 bar H<sub>2</sub>, 100 mg of cyclohexylmethyl ketone, 1 mol% Fe Catalyst, 5 mol% K<sub>2</sub>CO<sub>3</sub>, 0.5 ml iPrOH/0.2 ml H<sub>2</sub>O b. products were racemic.



**Table S6.** ATH of 3,3-dimethyl-2-butanone using iron catalysts **13**, **18-21**.<sup>a</sup>

| Entry | Conditions                               | Catalyst  | Alcohol /% | ee / %          |
|-------|------------------------------------------|-----------|------------|-----------------|
| 1     | FA/TEA (5:2)                             | <b>18</b> | 100        | 9 ( <i>S</i> )  |
| 2     | FA/TEA (5:2)                             | <b>19</b> | 100        | 10 ( <i>R</i> ) |
| 3     | FA/TEA (5:2)                             | <b>20</b> | 100        | 24 ( <i>R</i> ) |
| 4     | FA/TEA (5:2)                             | <b>21</b> | 100        | 26 ( <i>R</i> ) |
| 5     | <sup>i</sup> PrOH                        | <b>20</b> | 10.9       | 1 ( <i>R</i> )  |
| 6     | <sup>i</sup> PrOH                        | <b>21</b> | 39.8       | 11 ( <i>R</i> ) |
| 7     | HCO <sub>2</sub> Na/H <sub>2</sub> O/DMF | <b>20</b> | 0          | -               |
| 8     | HCO <sub>2</sub> Na/H <sub>2</sub> O/DMF | <b>21</b> | 0          | -               |

a. Conditions; 10 mol% catalyst used, 24 h, 60 °C, [S] = ca.1.5M for FA/TEA, ca. 0.2M for IPA and H<sub>2</sub>O 1.5M; DMF ca. 1M.

**Table S7.** Pressure hydrogenation of 3,3-dimethyl-2-butanone using catalysts **18-21**.<sup>a</sup>

| Reaction number | Catalyst  | Alcohol  |      |      | Ketone / % | Alcohol ee / %               |
|-----------------|-----------|----------|------|------|------------|------------------------------|
|                 |           | Total /% | R /% | S /% |            |                              |
| RCH1141         | <b>18</b> | 26       | 8.9  | 17.1 | 74         | 31 ( <i>S</i> )              |
|                 |           | 10       | 3.5  | 6.6  | 90         | 31 ( <i>S</i> )              |
| RCH1050         | <b>19</b> | 0.4      | 0.2  | 0.2  | 99.6       | -                            |
|                 |           | 0.2      | 0.1  | 0.1  | 99.8       | -                            |
| RCH1232         | <b>19</b> | 5.4      | 2.7  | 2.7  | 94.6       | 0                            |
|                 |           | 6.2      | 2.9  | 3.3  | 93.8       | -                            |
| RCH1051         | <b>21</b> | 5.2      | 4.2  | 1    |            | 62 <sup>b</sup> ( <i>R</i> ) |
|                 |           | 3.9      | 2.6  | 1.3  |            | 33 <sup>b</sup> ( <i>R</i> ) |
| RCH1233         | <b>20</b> | 5.2      | 3.5  | 1.7  | 94.8       | 34 <sup>b</sup> ( <i>R</i> ) |
|                 |           | 5.4      | 3.7  | 1.7  | 94.6       | 38 <sup>b</sup> ( <i>R</i> ) |

a. 1 mol% catalyst, 72h, 60 °C, 30 bar H<sub>2</sub>. b. Due to the low conversions, these values cannot be regarded as accurate.

**Table S8.** Transfer Hydrogenation using complexes **22-25**.<sup>a</sup>

| Reaction | Ketone       | Catalyst  | Activation       | Time /h    | T /°C | Alcohol |     |     | Formate |     |     | Ketone /% |
|----------|--------------|-----------|------------------|------------|-------|---------|-----|-----|---------|-----|-----|-----------|
|          |              |           |                  |            |       | %       | R%  | S%  | %       | R%  | S%  |           |
| RCH 1212 | Acetophenone | <b>25</b> | TMAO             | 24 (dark)  | 60    | 0       |     |     | 0       |     |     | 100       |
| RCH 1212 | Acetophenone | <b>25</b> | TMAO             | 24 (Light) | 60    | 1.1     | 0.6 | 0.5 | 1.9     | 1.2 | 0.7 | 97        |
| RCH 1213 | Acetophenone | <b>24</b> | TMAO             | 24 (dark)  | 60    | 0       |     |     | 0       |     |     | 100       |
| RCH 1213 | Acetophenone | <b>24</b> | TMAO             | 24 (Light) | 60    | 12.2    | 7.2 | 5   | 8.9     | 5   | 3.9 | 78.9      |
| RCH 1220 | Acetophenone | <b>24</b> | Blue Light       | 24         | 25    | 0       |     |     | 0       |     |     | 100       |
| RCH 1221 | acetophenone | <b>25</b> | Blue Light       | 24         | 25    | 0       |     |     | 0       |     |     | 100       |
| RCH      | acetophenone | <b>24</b> | UV ( $\lambda =$ | 24         | 25    | 0       |     |     | 0       |     |     | 100       |

|          |               |           |                          |            |    |     |     |     |     |     |     |      |
|----------|---------------|-----------|--------------------------|------------|----|-----|-----|-----|-----|-----|-----|------|
| 1224     | none          |           | 365 nm)                  |            |    |     |     |     |     |     |     |      |
| RCH 1225 | acetophe none | <b>25</b> | UV ( $\lambda$ = 365 nm) | 24         | 25 | 0   |     |     | 0   |     |     | 100  |
| RCH 1217 | acetophe none | <b>23</b> | TMAO                     | 24         | 60 | 6   | 2.6 | 3.4 | 1   | 0.4 | 0.6 | 93   |
| RCH 1216 | acetophe none | <b>22</b> | TMAO                     | 24         | 60 | 4.9 | 2.5 | 2.4 | 1.1 | 0.5 | 0.6 | 94   |
| RCH 1222 | acetophe none | <b>22</b> | Blue Light               | 24         | 25 | 0   |     |     |     |     |     | 100  |
| RCH 1223 | acetophe none | <b>23</b> | Blue Light               | 24         | 25 | 0   |     |     |     |     |     | 100  |
| RCH 1226 | acetophe none | <b>22</b> | UV ( $\lambda$ = 365 nm) | 24         | 25 | 0   |     |     |     |     |     | 100  |
| RCH 1227 | acetophe none | <b>23</b> | UV ( $\lambda$ = 365 nm) | 24         | 25 | 0   |     |     |     |     |     | 100  |
| RCH 1214 | Pinacolo ne   | <b>25</b> | TMAO                     | 24 (dark)  | 60 | 0   |     |     |     |     |     | 100  |
| RCH 1214 | Pinacolo ne   | <b>25</b> | TMAO                     | 24 (Light) | 60 | 7   | 2.9 | 4.1 |     |     |     | 93   |
| RCH 1215 | Pinacolo ne   | <b>24</b> | TMAO                     | 24 (dark)  | 60 | 0   |     |     |     |     |     | 100  |
| RCH 1215 | Pinacolo ne   | <b>24</b> | TMAO                     | 24 (Light) | 60 | 0.5 | 0.3 | 0.2 |     |     |     | 99.5 |
| RCH 1217 | Pinacolo ne   | <b>23</b> | TMAO                     | 24         | 60 | 0   |     |     |     |     |     | 100  |
| RCH 1218 | Pinacolo ne   | <b>22</b> | TMAO                     | 24         | 60 | 0   |     |     |     |     |     | 100  |

a. reaction conditions; [S] = *ca.* 1 M, TMAO (1 eq. relative to complexes) unless otherwise indicated.

**Table S9.** Pressure hydrogenation using Monophos complexes.<sup>a</sup>

| Reaction | Ketone       | Catalyst  | Alcohol  |      |      | Ketone /% |
|----------|--------------|-----------|----------|------|------|-----------|
|          |              |           | Total /% | R /% | S /% |           |
| RCH1206  | Acetophenone | <b>24</b> | 0.8      | 0.5  | 0.3  | 98.9      |
|          |              |           | 0.6      | 0.4  | 0.2  | 99.1      |
| RCH1207  | Acetophenone | <b>25</b> | 2        | 1.2  | 0.8  | 97.7      |
|          |              |           | 2.1      | 1.2  | 0.9  | 97.7      |
| RCH1229  | Acetophenone | <b>22</b> | 0.2      | 0.1  | 0.1  | 99.8      |
|          |              |           | 0.2      | 0.1  | 0.1  | 99.8      |
| RCH1228  | Acetophenone | <b>23</b> | 0.4      | 0.1  | 0.3  | 99.6      |
|          |              |           | 0.2      | 0    | 0.2  | 99.8      |
| RCH1208  | pinacolone   | <b>24</b> | 1        | 0.5  | 0.5  | 98.9      |
|          |              |           | 2        | 1    | 1    | 98.1      |
| RCH1209  | pinacolone   | <b>25</b> | 4.5      | 2.2  | 2.3  | 95.5      |
|          |              |           | 3.1      | 1.5  | 1.6  | 96.9      |
| RCH1231  | Pinacolone   | <b>22</b> | 0.2      | 0.1  | 0.1  | 99.8      |
|          |              |           | 0.2      | 0.1  | 0.1  | 99.8      |
| RCH1230  | Pinacolone   | <b>23</b> | 0.2      | 0.1  | 0.1  | 99.8      |
|          |              |           | 0.4      | 0.2  | 0.2  | 99.6      |

a. Reaction conditions; 1 mol% catalyst, [[S] = 0.83 (100 mg), 30 bar H<sub>2</sub>, iPrOH/H<sub>2</sub>O (0.5 ml/0.2ml) used as solvent.

**Table S10.** Effect of added phosphine on APH of acetophenone using catalyst **13**.<sup>a</sup>

| Entry | Activator (mol%) | Additive (%)          | Conv | ee                |
|-------|------------------|-----------------------|------|-------------------|
| 1     | TMAO (1%)        | PPh <sub>3</sub> (1%) | 93.5 | 10.6 ( <i>S</i> ) |
| 2     | TMAO (2%)        | PPh <sub>3</sub> (1%) | 60.4 | 7.8 ( <i>S</i> )  |
| 3     | TMAO (3%)        | PPh <sub>3</sub> (1%) | 11.2 | 8.8 ( <i>S</i> )  |
| 4     | TMAO (2%)        | PPh <sub>3</sub> (2%) | 0    |                   |
| 5     | TMAO (3%)        | PPh <sub>3</sub> (2%) | 0    |                   |

a. Reaction conditions; 1 mol% catalyst, [S] = 1.9 M (206 mg, 200  $\mu$ l), 30 bar H<sub>2</sub>, iPrOH/H<sub>2</sub>O (0.5 ml/ 0.2mL) used as solvent, 80 °C, 18h.

**Table S11.** Effect of added MONOPHOS on APH of acetophenone using catalyst **13**.<sup>a</sup>

| Entry | Activator (mol%) | Additive (1 mol%)     | Conv./% | Ee <sup>b</sup> /% |
|-------|------------------|-----------------------|---------|--------------------|
| 1     | TMAO (1%)        | ( <i>R</i> )-MONOPHOS | 99.8    | 10 ( <i>S</i> )    |
| 2     | TMAO (2%)        | ( <i>R</i> )-MONOPHOS | 66.4    | 9 ( <i>S</i> )     |
| 3     | TMAO (1%)        | ( <i>S</i> )-MONOPHOS | 99.7    | 12 ( <i>S</i> )    |
| 4     | TMAO (2%)        | ( <i>S</i> )-MONOPHOS | 54.2    | 9 ( <i>S</i> )     |

a Reaction conditions; 1 mol% catalyst, [S] = 1.9 M (206 mg, 200  $\mu$ l), 30 bar H<sub>2</sub>, iPrOH/H<sub>2</sub>O (0.5 ml/ 0.2mL) used as solvent, 80 °C, 18h.

#### <sup>1</sup>H-NMR of ATH reduction using catalyst **24**.

In a J. Young's borosilicate NMR tube, under nitrogen atmosphere, complex **24** (10 mg,  $9.8 \times 10^{-3}$  mmol) was dissolved in C<sub>6</sub>D<sub>6</sub> (0.6 mL) and <sup>1</sup>H NMR spectrum was recorded (Figure 3). Acetophenone (5.7  $\mu$ L,  $4.9 \times 10^{-2}$  mmol) was added. Then the mixture was degassed by three freeze-pump-thaw cycles, back-filled with hydrogen at -196 °C and the NMR tube was sealed. The mixture was warmed to room temperature and irradiated under 365 nm UV light (Spectroline ERT-260C/F, 6 Watt, 8 cm from source). The reaction progress was monitored by <sup>1</sup>H NMR. Figure 4 shows the <sup>1</sup>H NMR after 1 hour (lower spectrum), 3 hours (middle spectrum) and 4 hours (upper spectrum) irradiation. Figure 5 shows the zoom of the hydride region. Upon irradiation the peaks of complex **24** decreased and Fe-H species appeared. The main doublet at -12.11 ppm (*J* = 88.6 Hz) and the doublet at -12.18 ppm (*J* = 80.1 Hz) can be tentatively assigned to two hydride diastereoisomers or rotamers deriving from complex. The doublet at -11.40 ppm (*J* = 88.6 Hz) can be tentatively assigned to the hydride species derived from complex **25** present as impurity in **24**, on the basis of its similar integral value. After 4 h of UV irradiation, the mixture was heated at 80 °C for 3 days and a NMR was recorded. The <sup>1</sup>H NMR indicated that after heating the complex **24** was re-formed (Figure 6) and the doublet at -12.18 ppm became the main hydride species (Figure 7). The mixture was

filtered through a short plug of silica gel, washed through with EtOAc/petroleum ether 3/7 (until no further alcohol was eluted) and analysed by GC using the previously cited GC conditions. The conversion of acetophenone to alcohol by  $^1\text{H}$  NMR (Figure 6) could not be established due to the low sensitivity of the NMR. Therefore the isolated product from the reaction was analysed by GC (Figure 8). This indicated a conversion of ca 5.9 % and a product ee of 18.% (*R*).

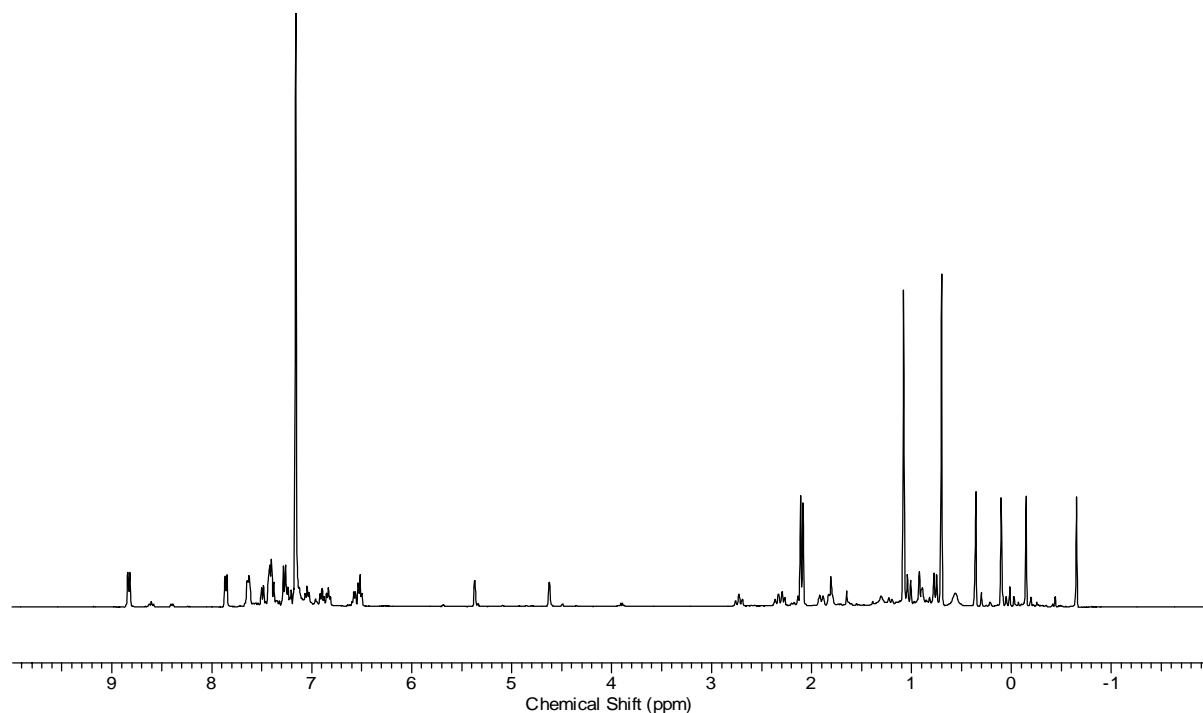

**Figure 3.**  $^1\text{H}$  NMR of complex **24** in  $\text{C}_6\text{D}_6$

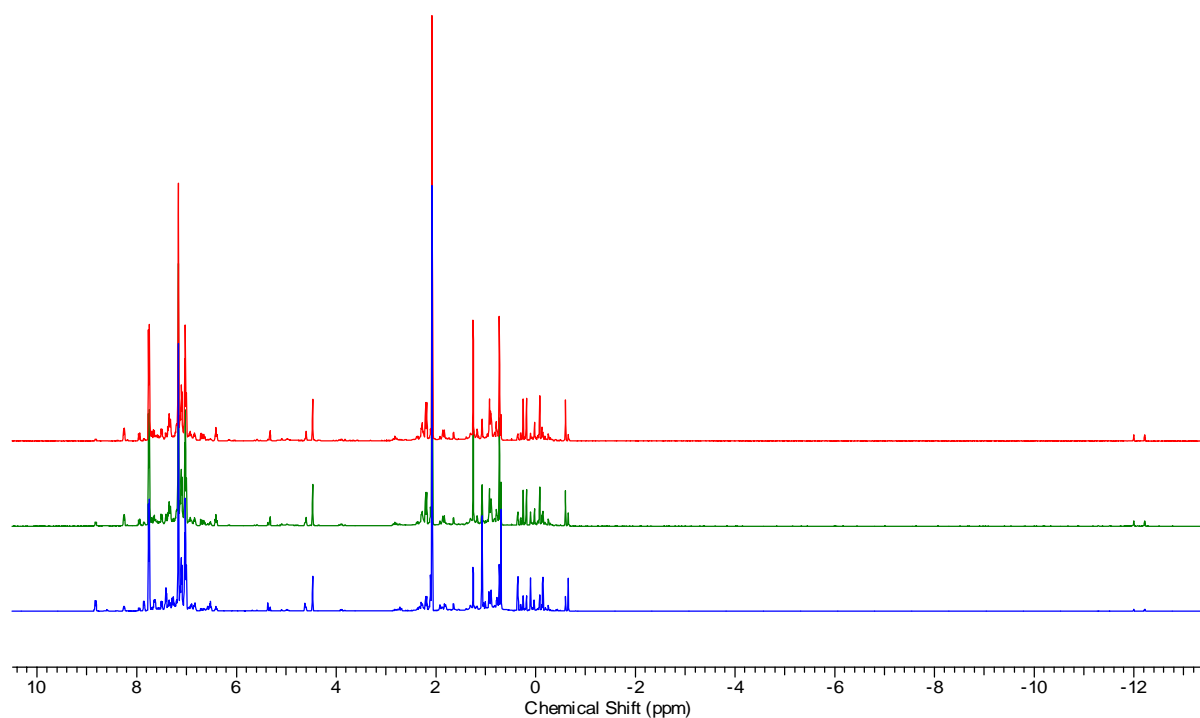

**Figure 4.**  $^1\text{H}$  NMR series of the mixture of complex **24** and acetophenone under hydrogen pressure after 1 hour (lower spectrum), 3 hours (middle spectrum) and 4 hours (upper spectrum) irradiation at 365 nm.

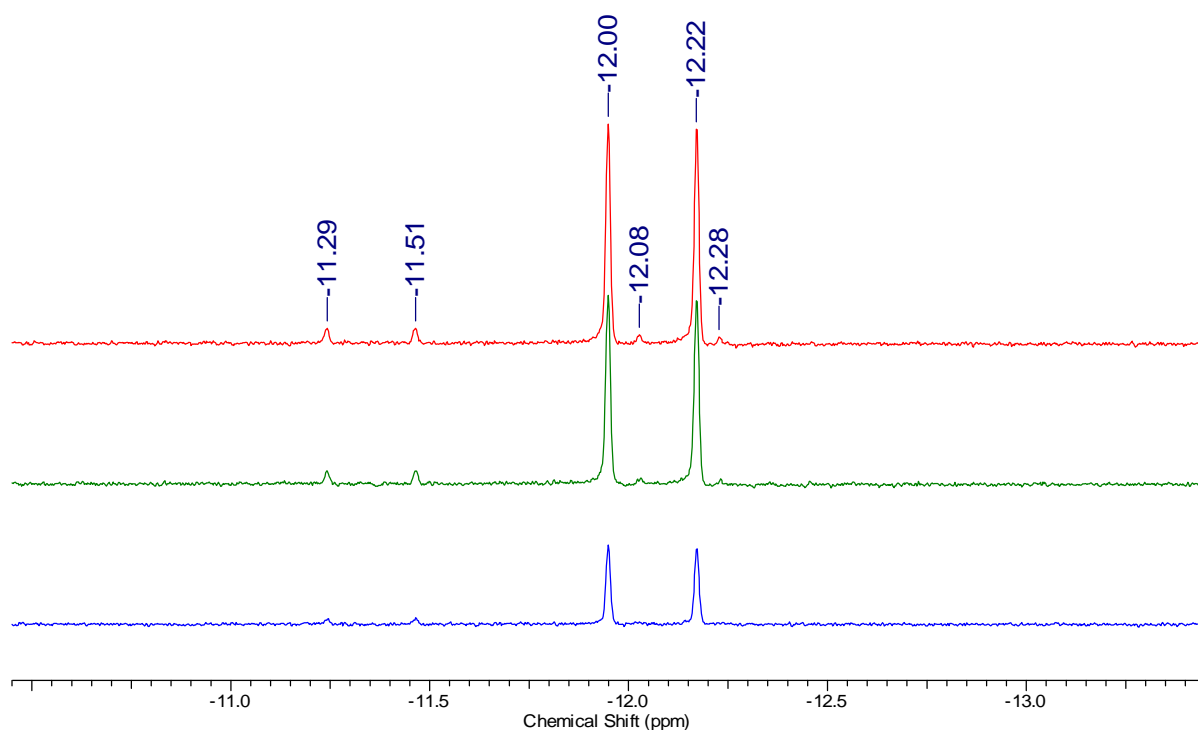

**Figure 5.** Zoom of the region of the  $^1\text{H}$  NMR series of the mixture of complex **24** and acetophenone under hydrogen pressure after 1 hour (lower spectrum), 3 hours (middle spectrum) and 4 hours (upper spectrum) irradiation at 365 nm.

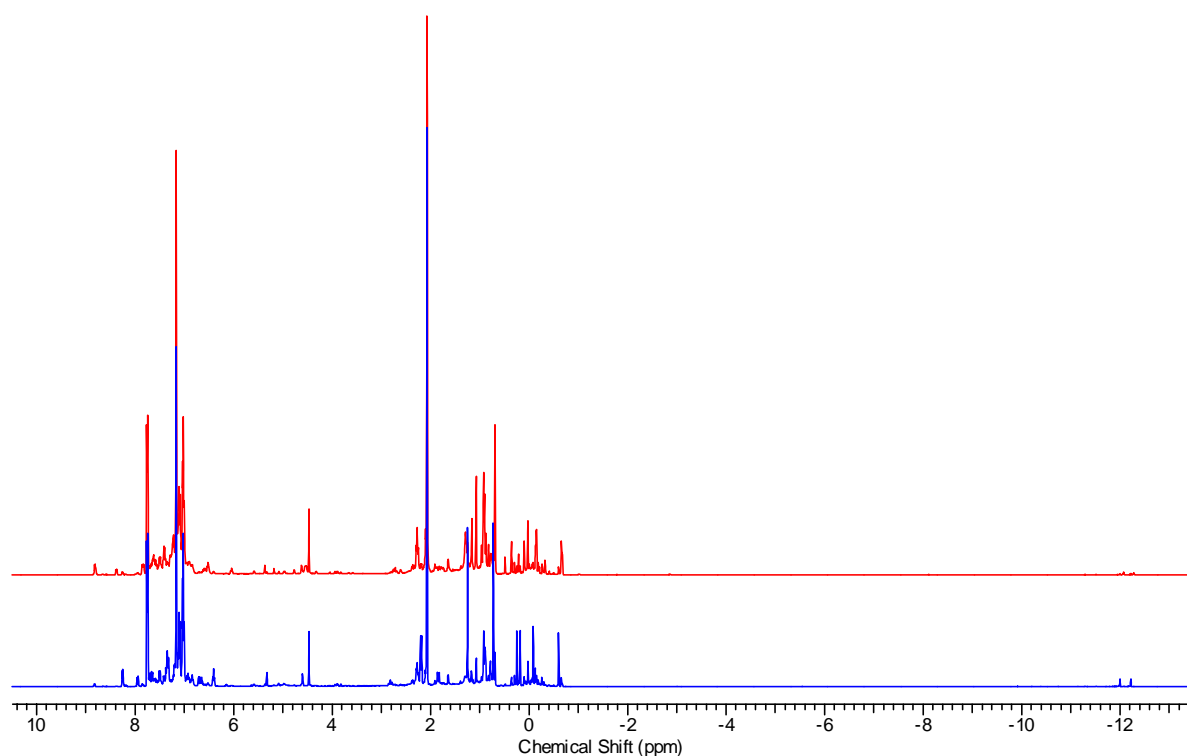

**Figure 6.**  $^1\text{H}$  NMR series of the mixture of complex **24** and acetophenone under hydrogen pressure after 4 hours irradiation at 365 nm(lower spectrum) and after heating the mixture at 80 °C for 3 days (upper spectrum).

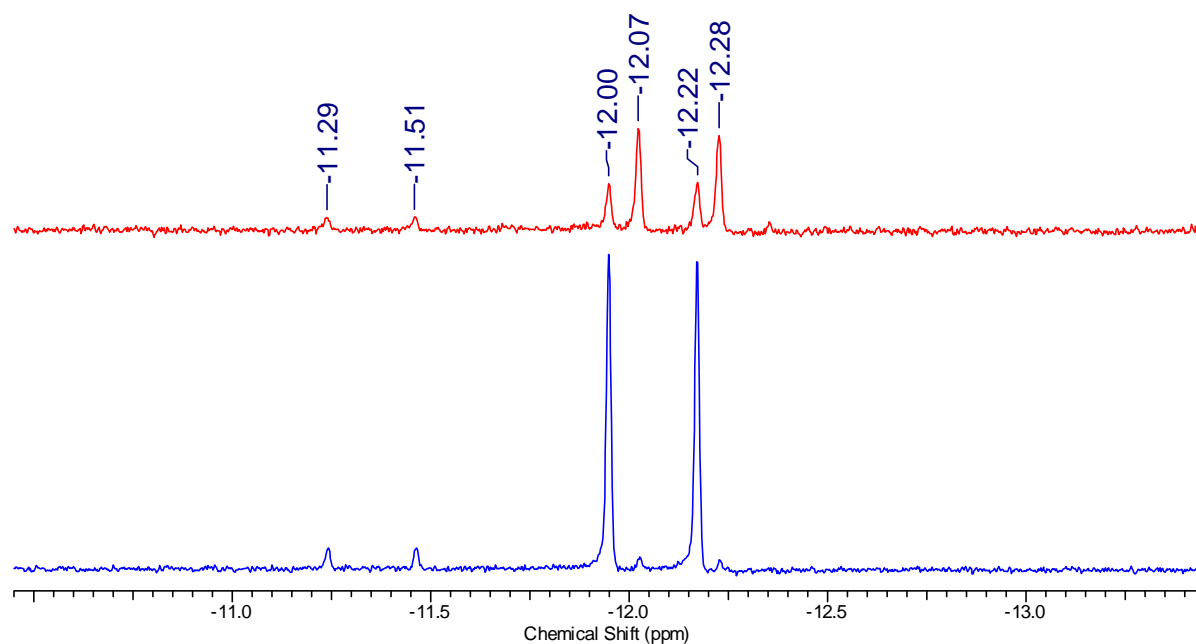

**Figure 7.** Zoom of the region of the  $^1\text{H}$  NMR series (offset at -0.15 ppm) of the mixture of complex **24** and acetophenone under hydrogen pressure after 4 hours irradiation at 365 nm(lower spectrum) and after heating the mixture at 80 °C for 3 days (upper spectrum).

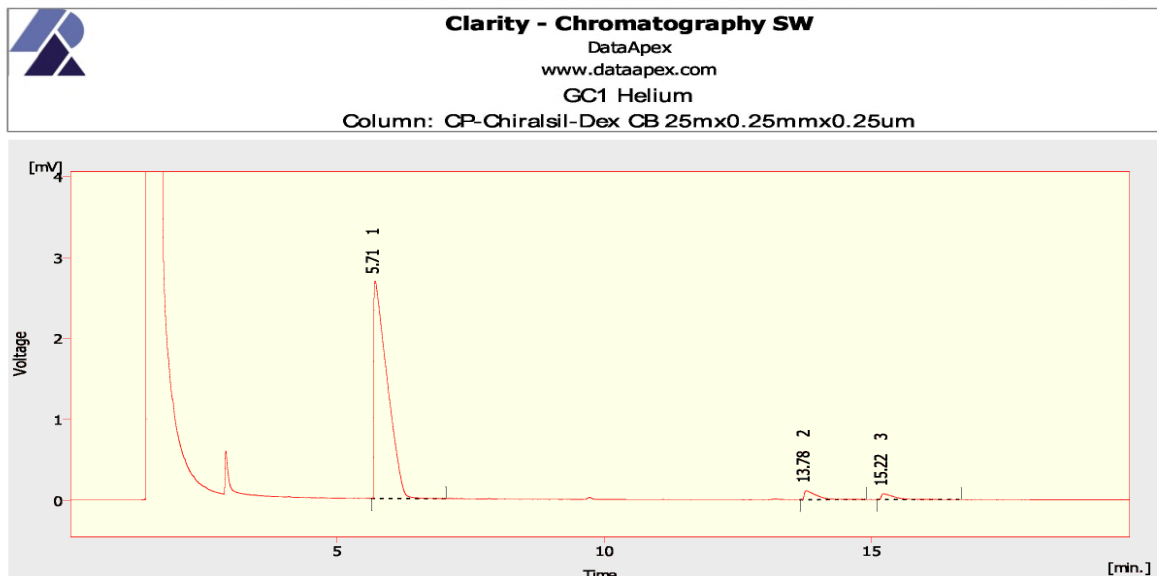

Result Table (Uncal - C:\Clarity\WORK1\DATA\ADG\ADG214 Irun - U-PAD2 - 1)

|   | Reten. Time<br>[min] | Area<br>[mV.s] | Height<br>[mV] | Area<br>[%] | Height<br>[%] | W05<br>[min] | Compound<br>Name |
|---|----------------------|----------------|----------------|-------------|---------------|--------------|------------------|
| 1 | 5.712                | 465.510        | 26.793         | 94.1        | 93.7          | 0.28         |                  |
| 2 | 13.776               | 17.234         | 1.092          | 3.5         | 3.8           | 0.23         |                  |
| 3 | 15.224               | 11.986         | 0.710          | 2.4         | 2.5           | 0.24         |                  |
|   | Total                | 494.730        | 28.596         | 100.0       | 100.0         |              |                  |

**Figure 8.** GC spectrum of isolated product mixture (He gas, 110 °C). 5.9% conv. ee 18.0% (*R*); ketone; 5.7 min, (*R*) isomer; 13.8 min, (*S*) isomer; 15.2 min.

### Hydride species formed from complex **25**.

This experiment was carried out in order to establish the identity of the minor peaks in the above experiment. In a J. Young's borosilicate NMR tube, complex **25** (10 mg,  $9.8 \times 10^{-3}$  mmol) was dissolved in  $C_6D_6$  (0.6 mL) and  $^1H$  NMR spectrum was recorded (Figure 9). Then the mixture was degassed by three freeze-pump-thaw cycles, back-filled with hydrogen at -196 °C and the NMR tube was sealed. The mixture was warmed at room temperature and irradiated under 365 nm UV light (Spectroline ERT-260C/F, 6 Watt, 8 cm from source). The reaction progress was monitored by  $^1H$  NMR. Figure 10 shows the  $^1H$  NMR after 4 hours (lower spectrum), 8 hours (middle spectrum) and 10 hours (upper spectrum) irradiation. Figure 11 shows the zoom of the hydride region. Upon irradiation the peaks of complex **25** decreased and Fe-H species appeared. The  $^1H$  NMR spectrum showed four visible doublets. The main doublet at -11.42 ppm ( $J = 88.8$  Hz) and the doublet at -12.51 ppm ( $J = 81.5$  Hz) can be tentatively assigned to two hydride diastereoisomers or rotamers derived from complex **25**, while the doublets at -12.11 ppm ( $J = 89.1$  Hz) and at 12.19 ppm ( $J = 80.0$  Hz) can be tentatively assigned to the hydride species deriving from complex **24** present as

impurity. The  $^1\text{H}\{^{31}\text{P}\}$  NMR spectrum showed two more hydride peaks at -9.81 and -12.41 ppm not visible in the  $^1\text{H}$  NMR spectrum (Figure 12).

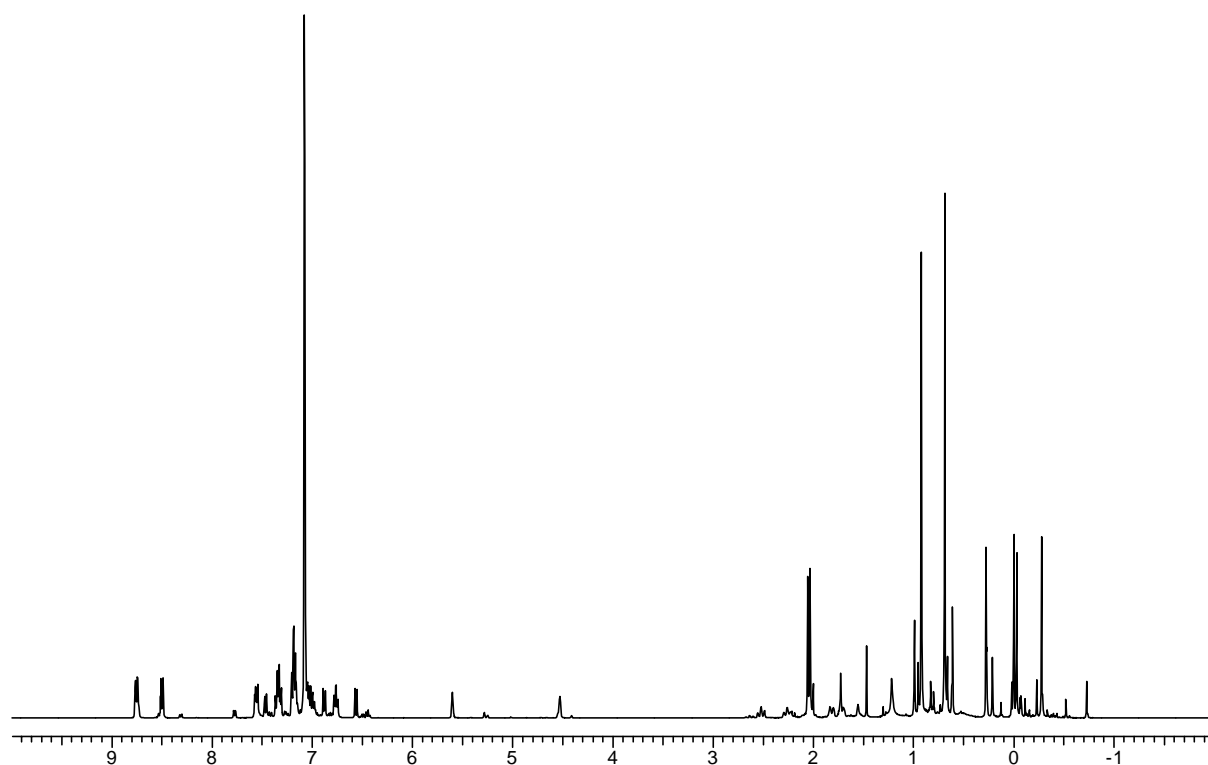

**Figure 9.**  $^1\text{H}$  NMR of complex **25** in  $\text{C}_6\text{D}_6$



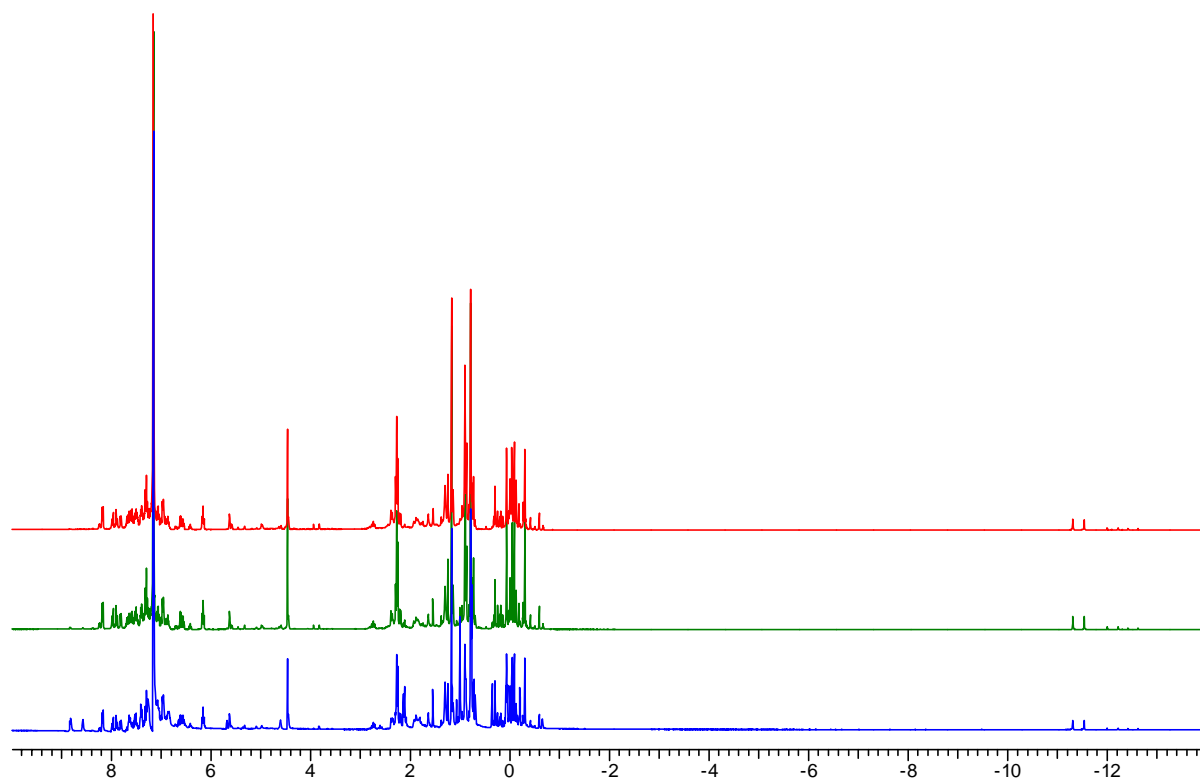

**Figure 10.**  $^1\text{H}$  NMR series of the complex **25** under hydrogen pressure after 4 hours (lower spectrum), 8 hours (middle spectrum) and 10 hours (upper spectrum) irradiation at 365 nm.

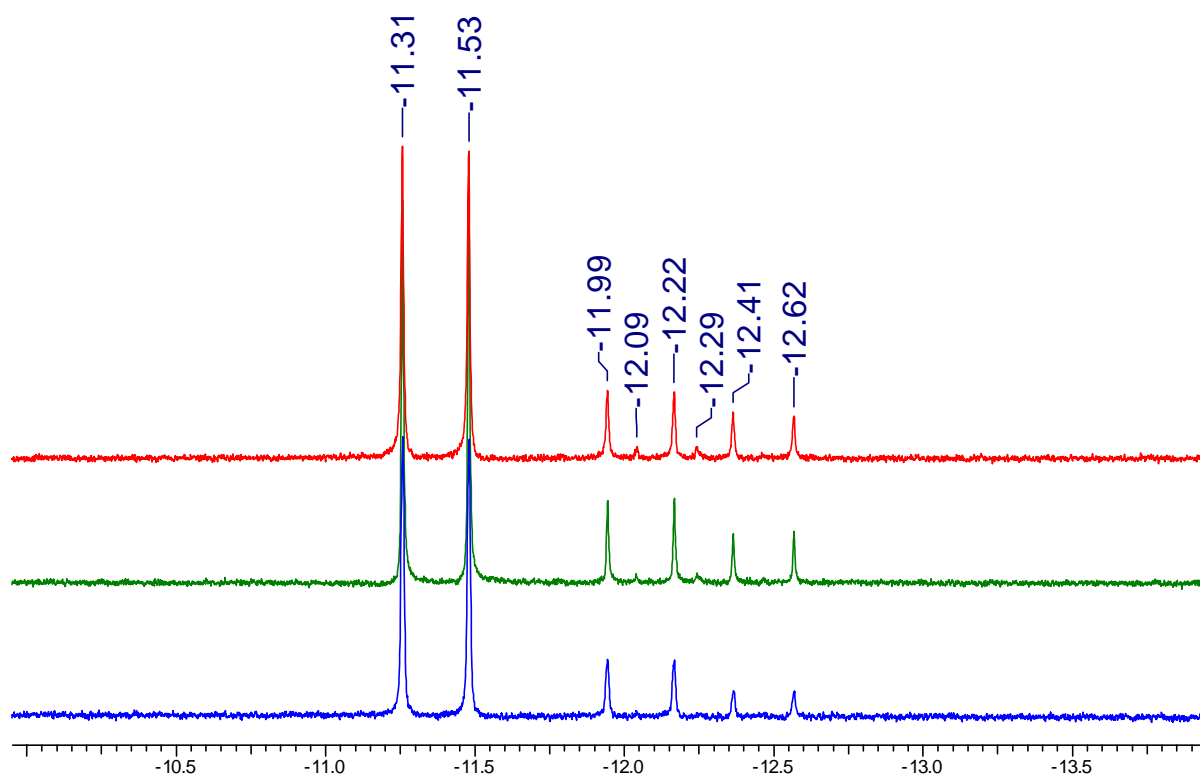

**Figure 11.** Zoom of the region of the  $^1\text{H}$  NMR series of the complex **25** under hydrogen pressure after 4 hours (lower spectrum), 8 hours (middle spectrum) and 10 hours (upper spectrum) irradiation at 365 nm.

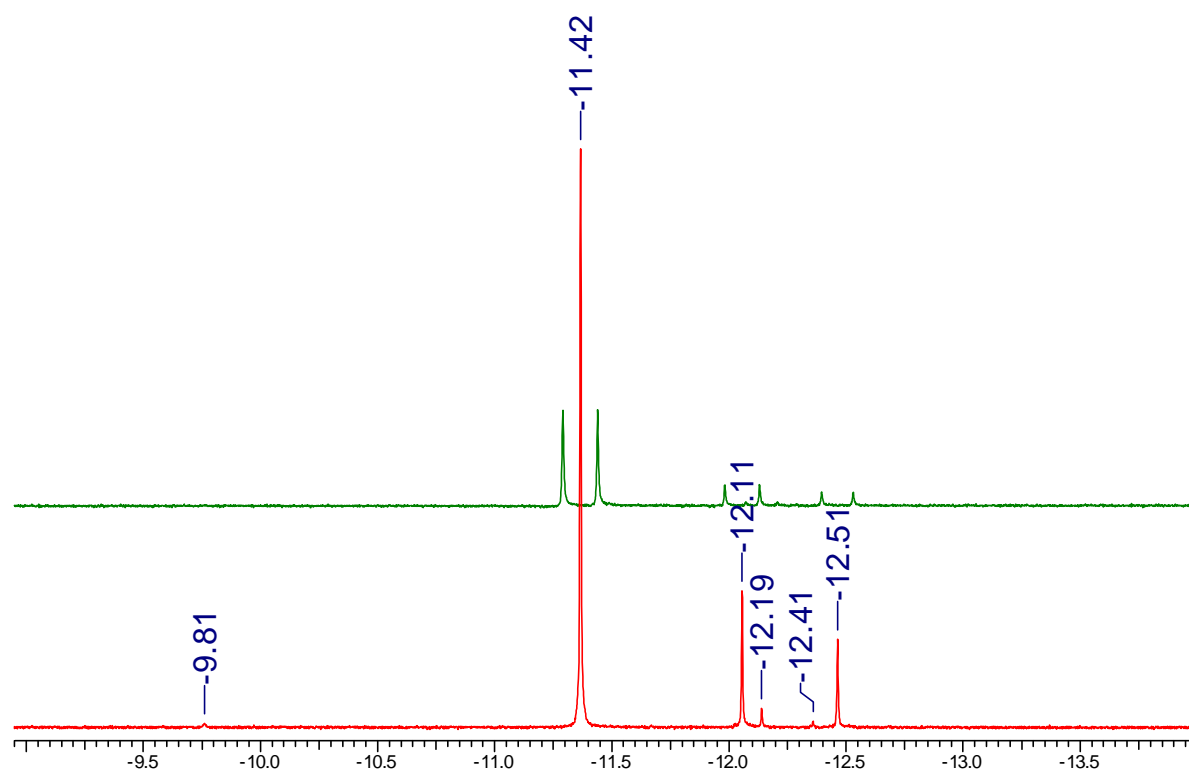

**Figure 12.**  $^1\text{H}$  NMR (upper spectrum) and  $^1\text{H}\{^{31}\text{P}\}$  NMR of the mixture of complex **25** under hydrogen pressure after 10 hours irradiation at 365 nm

## NMR spectra of complexes and intermediates

(3*S*,6*S*)-1,8-Diphenylocta-1,7-diyne-3,6-diol **12**.

$\delta_H$  (500 MHz,  $CDCl_3$ )

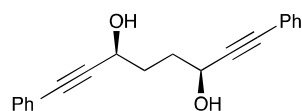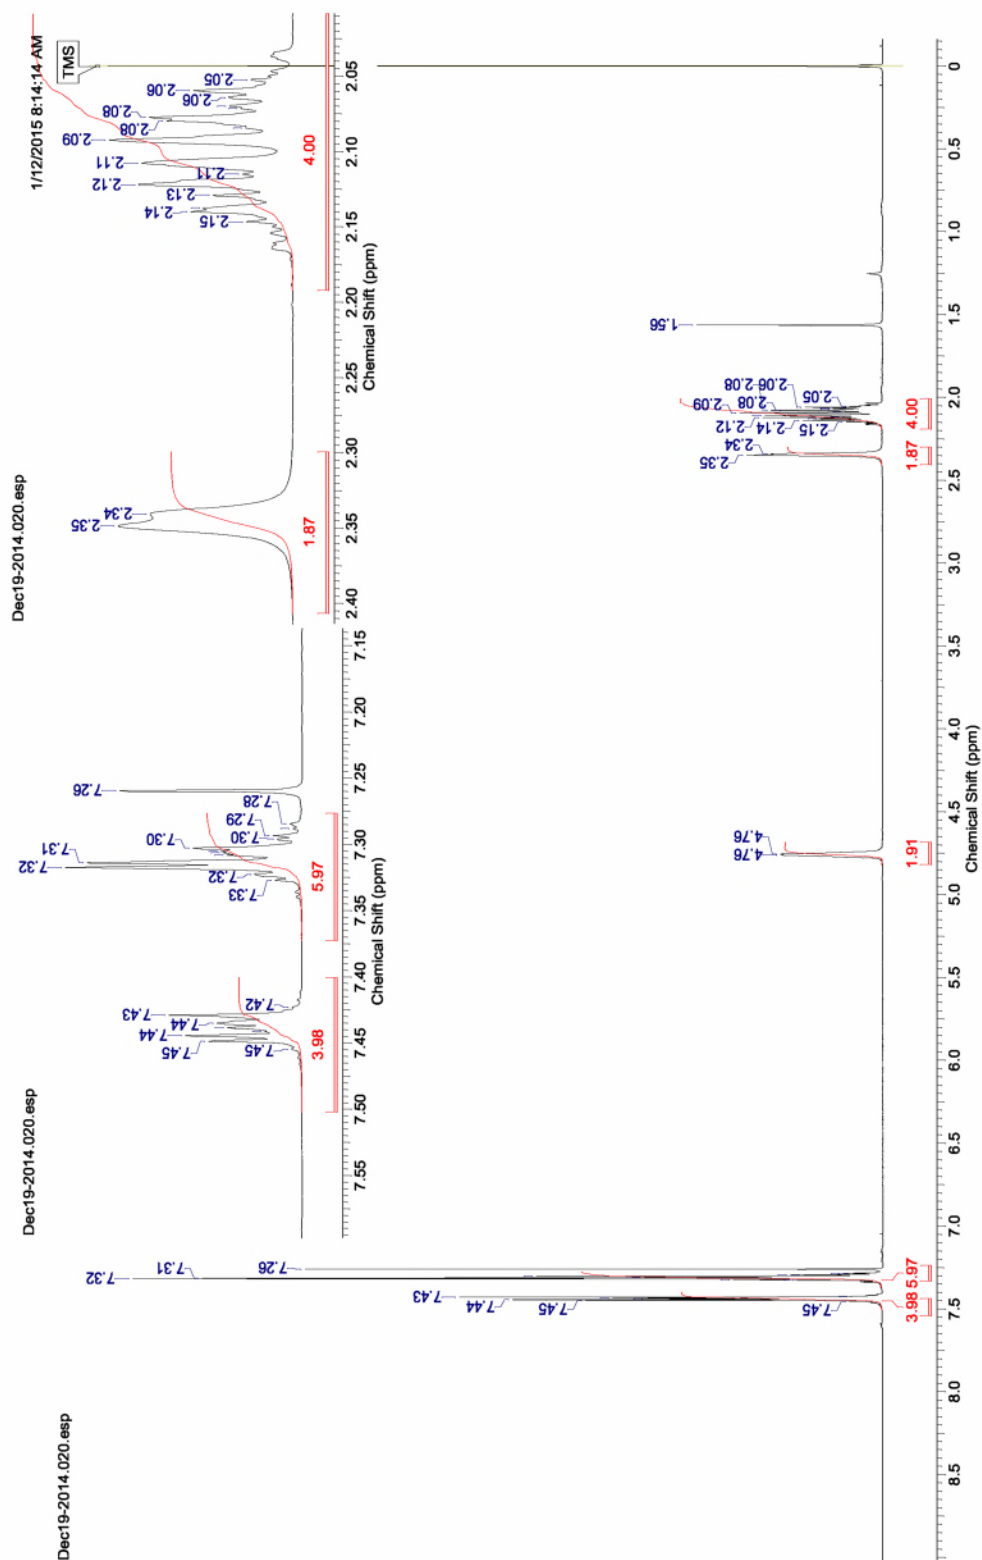

$\delta_C$  (125 MHz,  $CDCl_3$ )

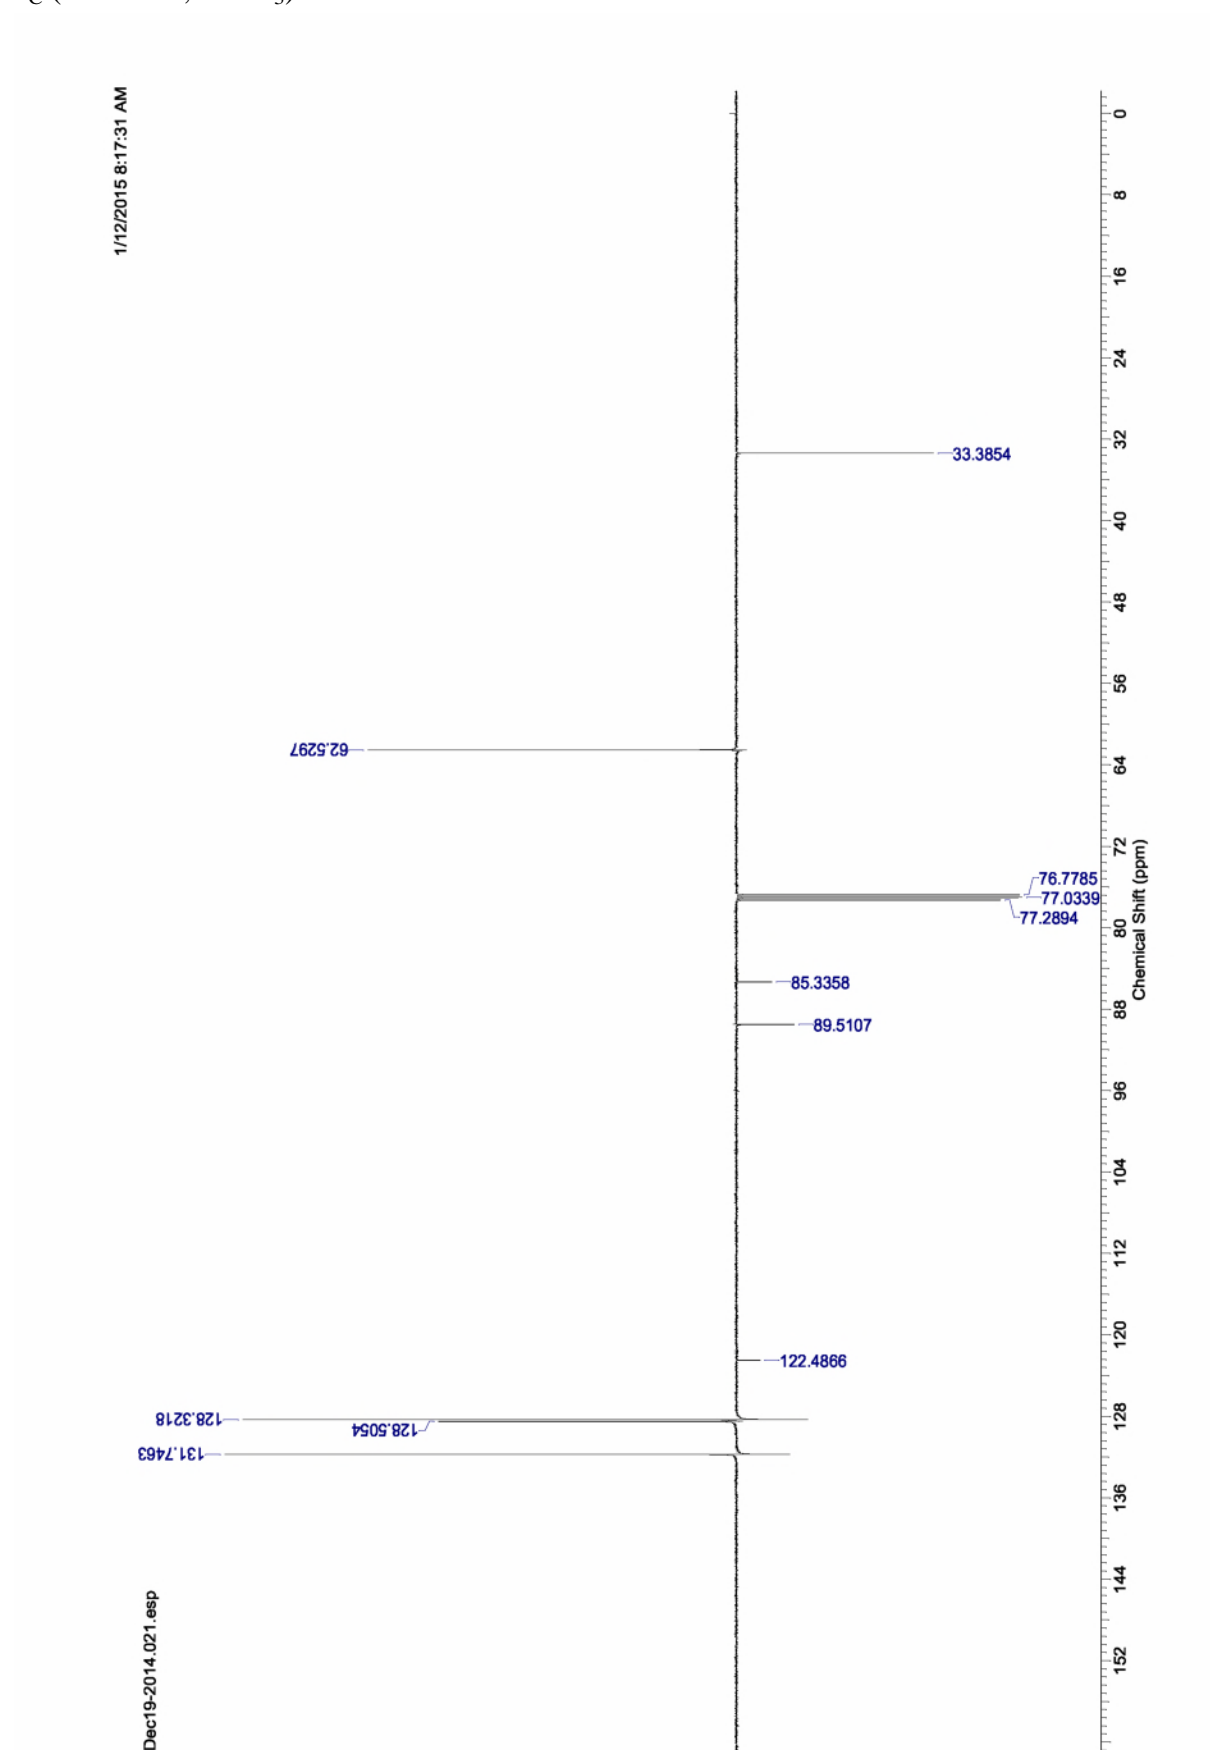

## HPLC Trace for diol 12.

Conditions: IB column, 30°C, 80% Hexane: 20% *iso*-propanol, 1 ml/min. 99% ee and 96% de

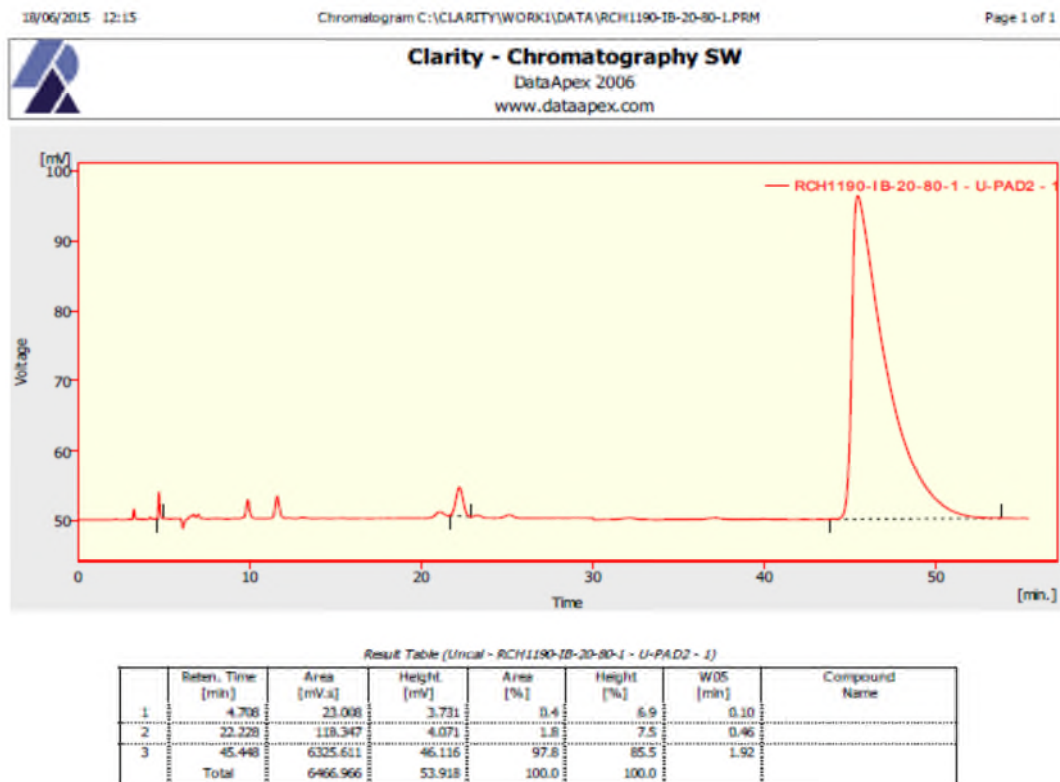

Reference to diol synthesis and ee determination: Fang, Z.; Wills, M. *J. Org. Chem.* **2013**, 78, 8594–8605.

Tricarbonyl ((4*S*,7*S*)-4,7-dihydroxy-1,3-diphenyl-4,5,6,7-tetrahydro-2*H*-inden-2-one) iron **13**.

$\delta_H$  (500 MHz,  $CDCl_3$ )

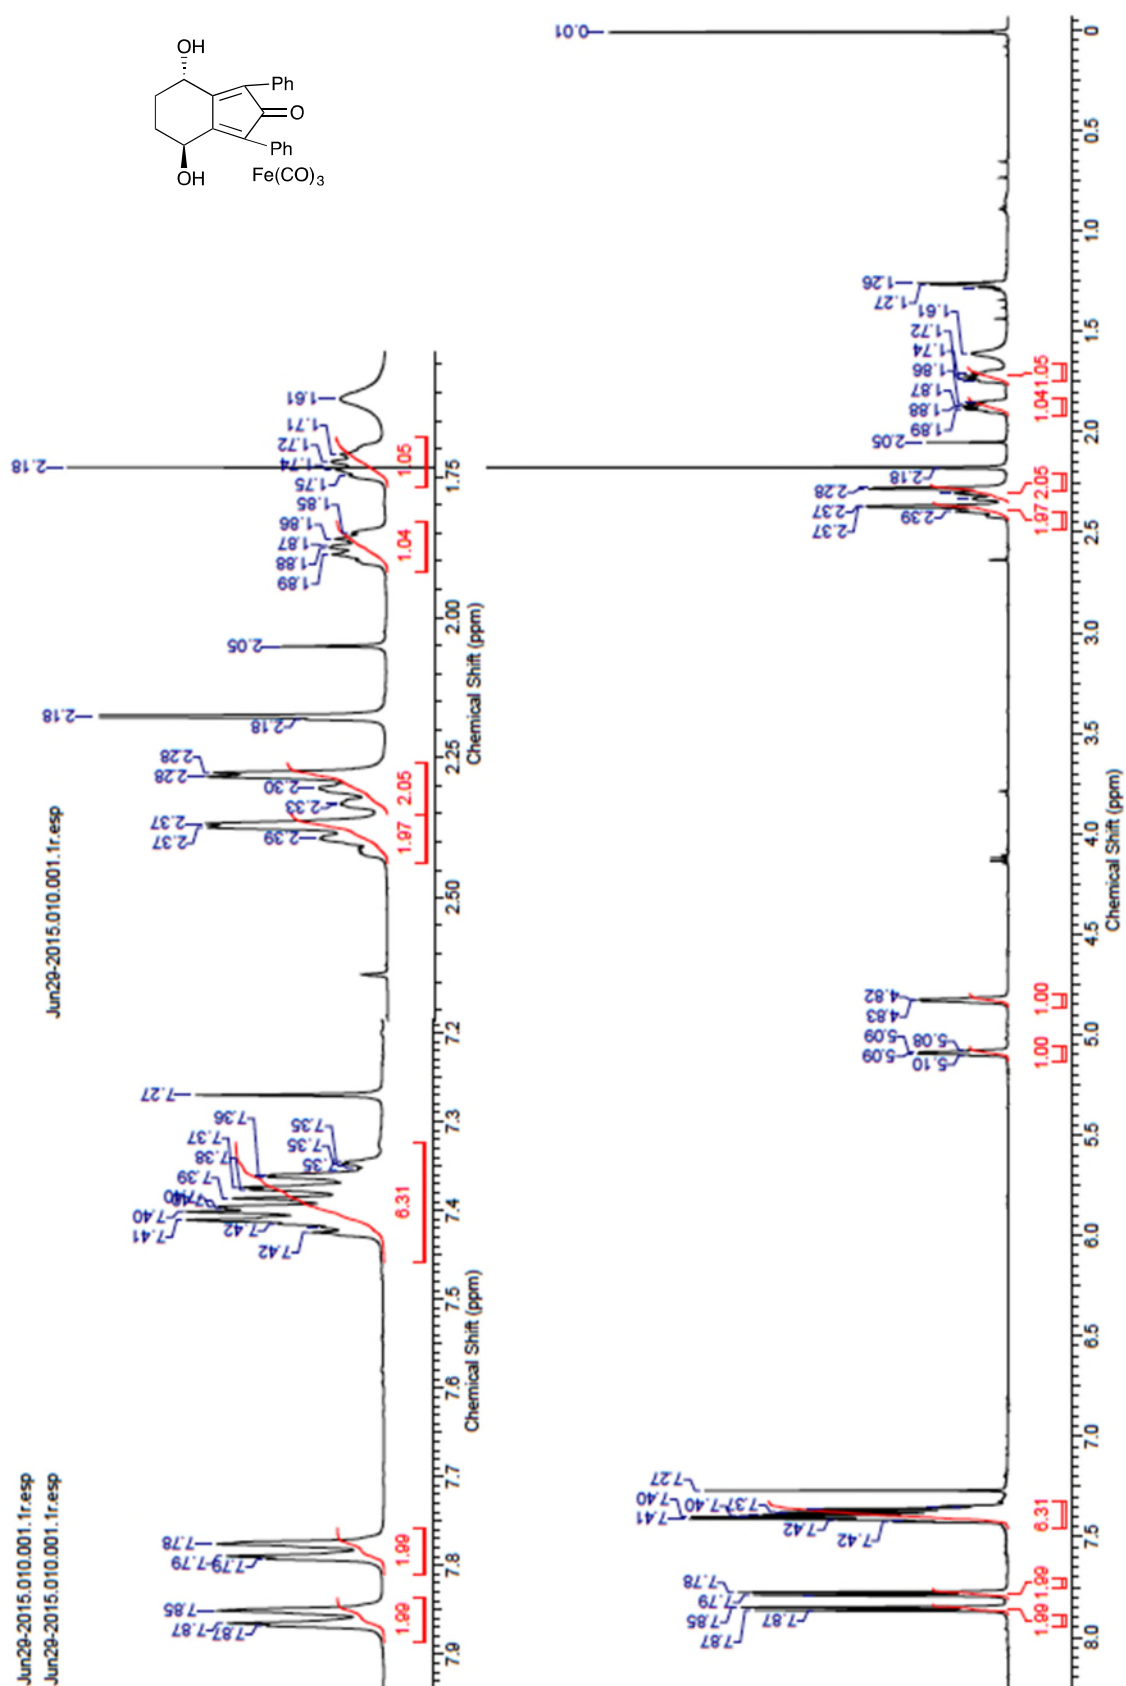

$\delta_C$  (125 MHz,  $CDCl_3$ ).

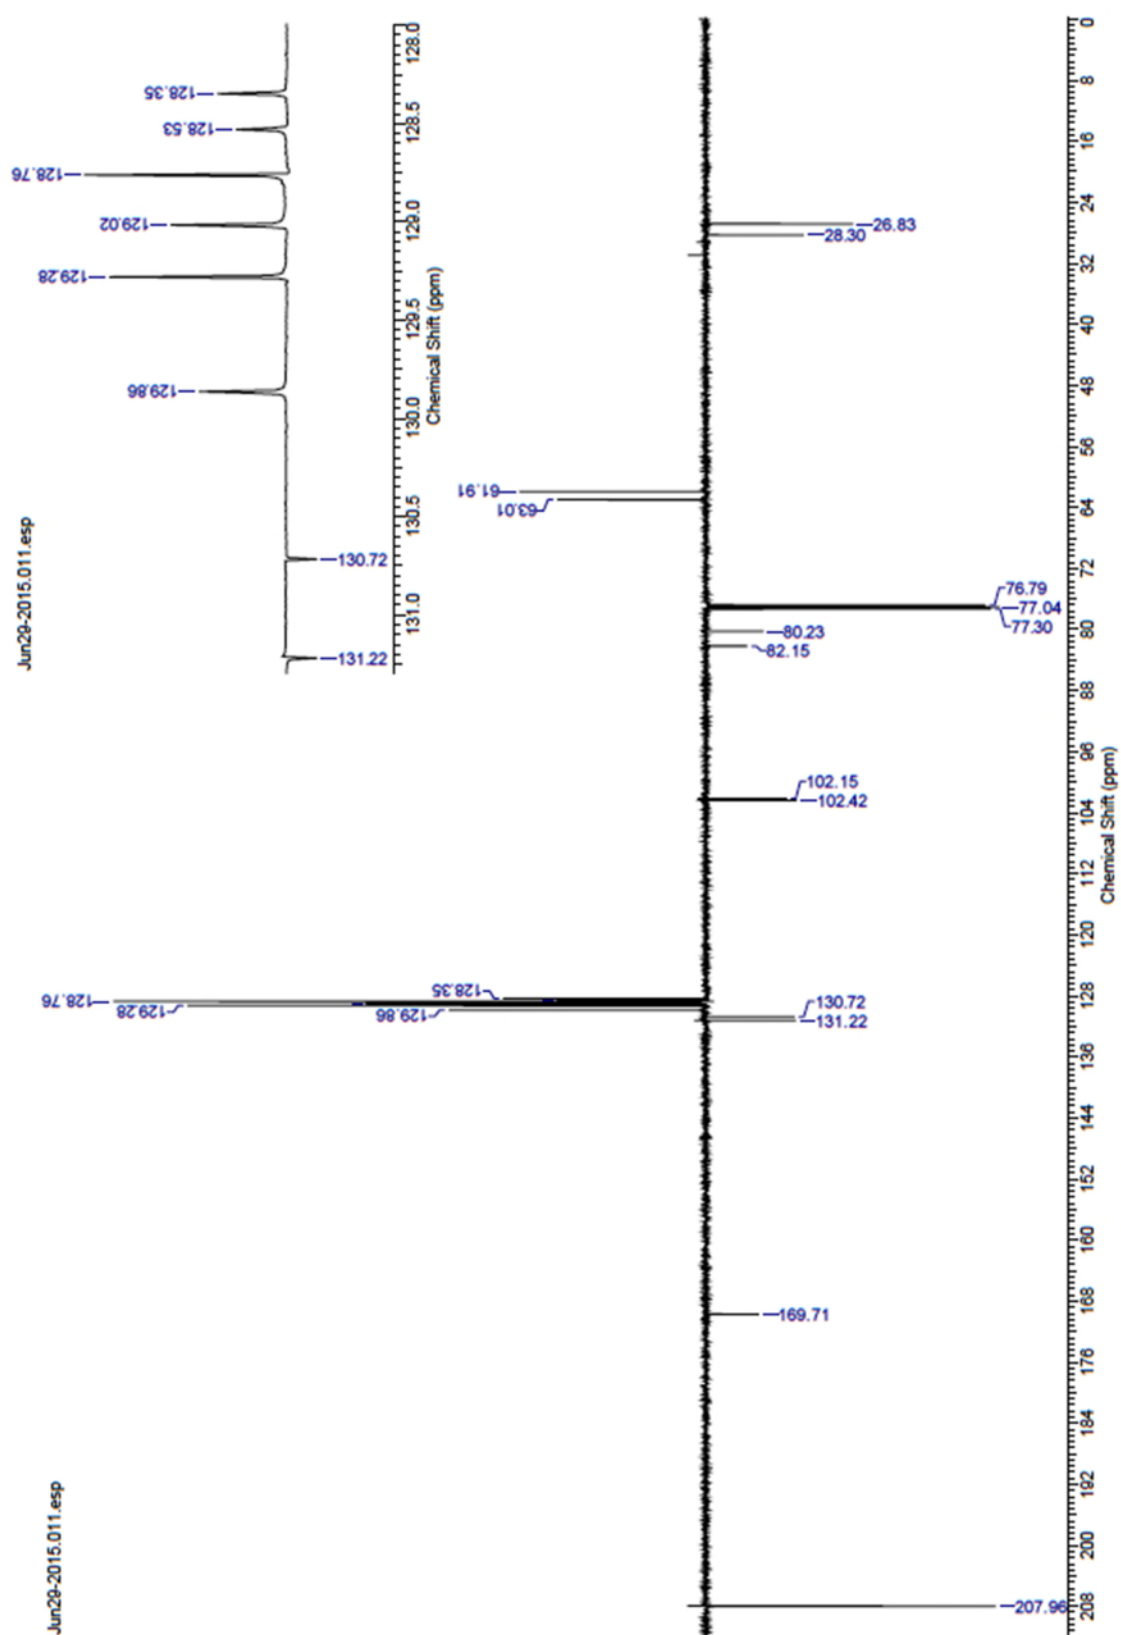

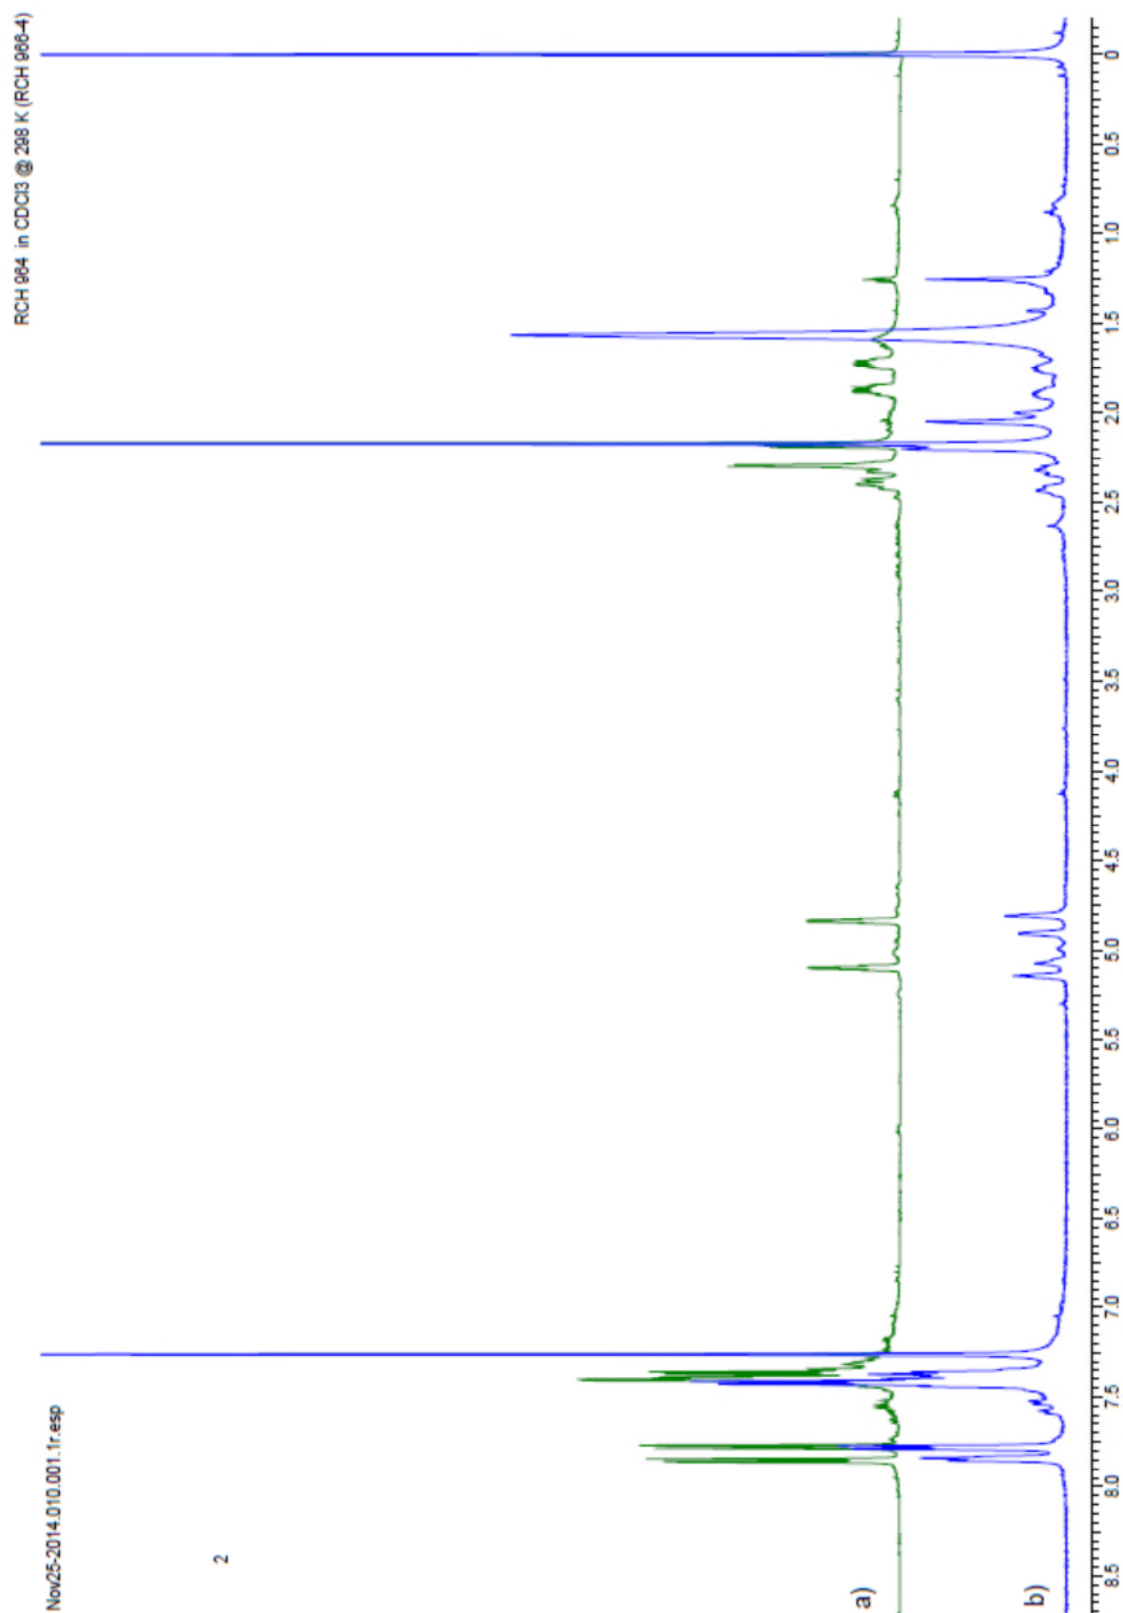

a) Enantiomerically-pure (*S,S*)-OH catalyst **13**; b) racemic/meso OH catalyst **13** from racemic diol.



((3*S*,6*S*)-3,6-Bis(benzyloxy)octa-1,7-diyne-1,8-diyl)dibenzene **14**.

$\delta_H$  (500 MHz,  $CDCl_3$ )

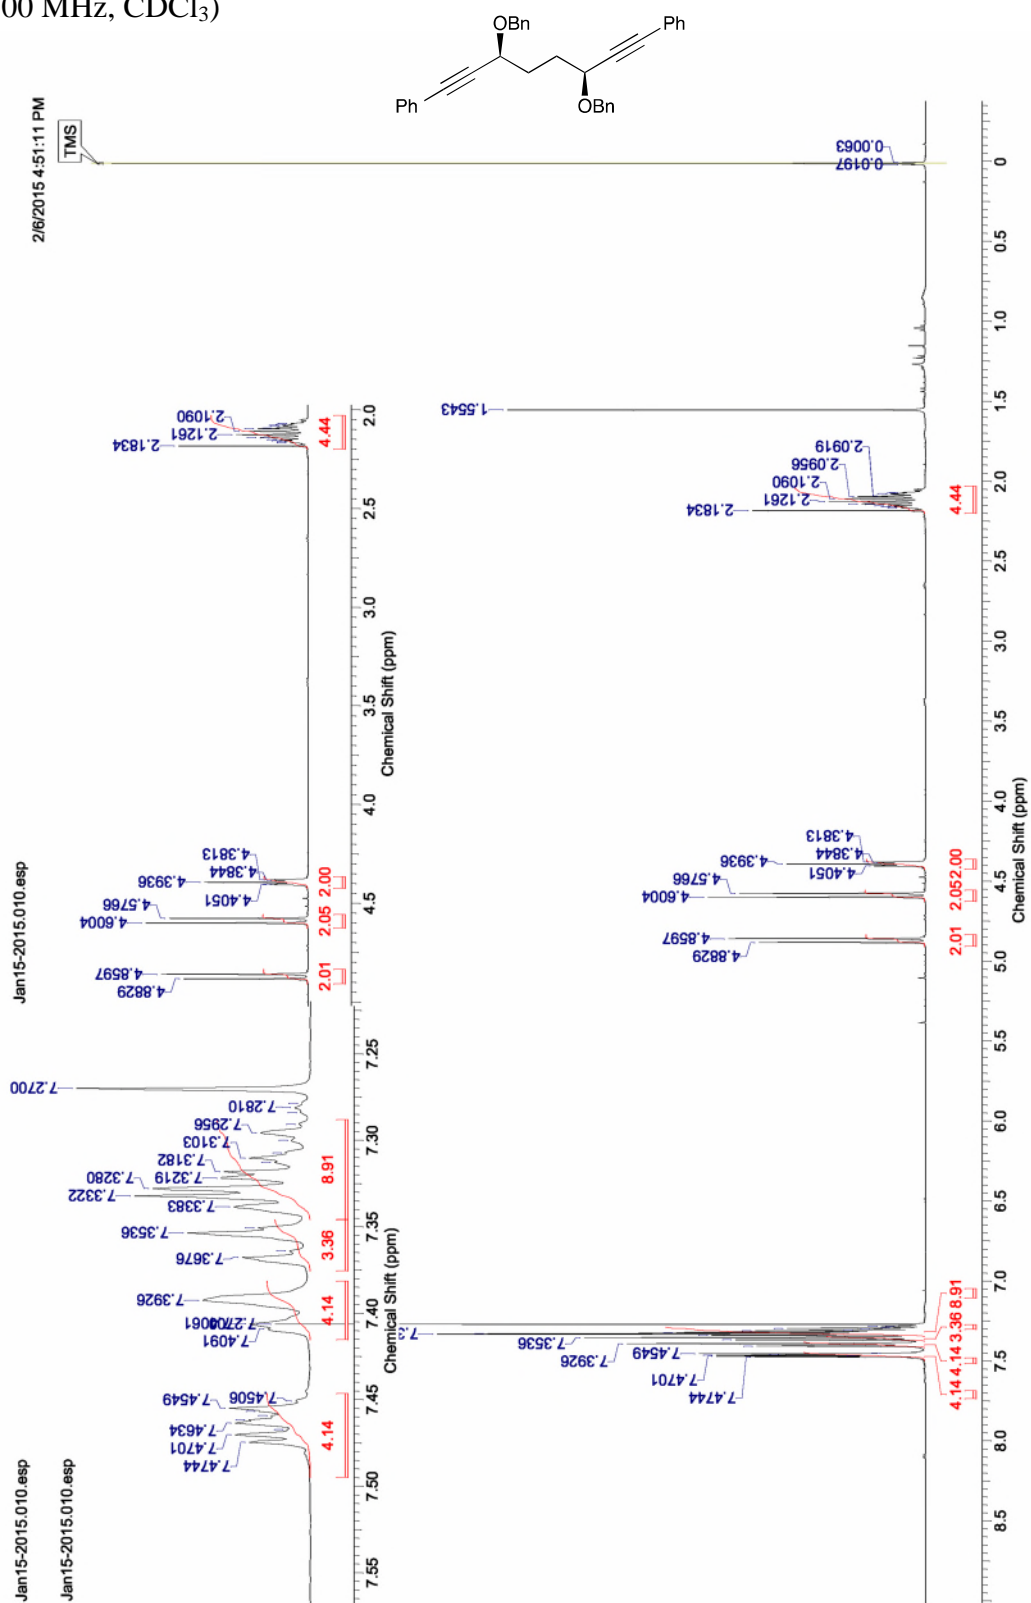

$\delta_c$  (125 MHz,  $\text{CDCl}_3$ )

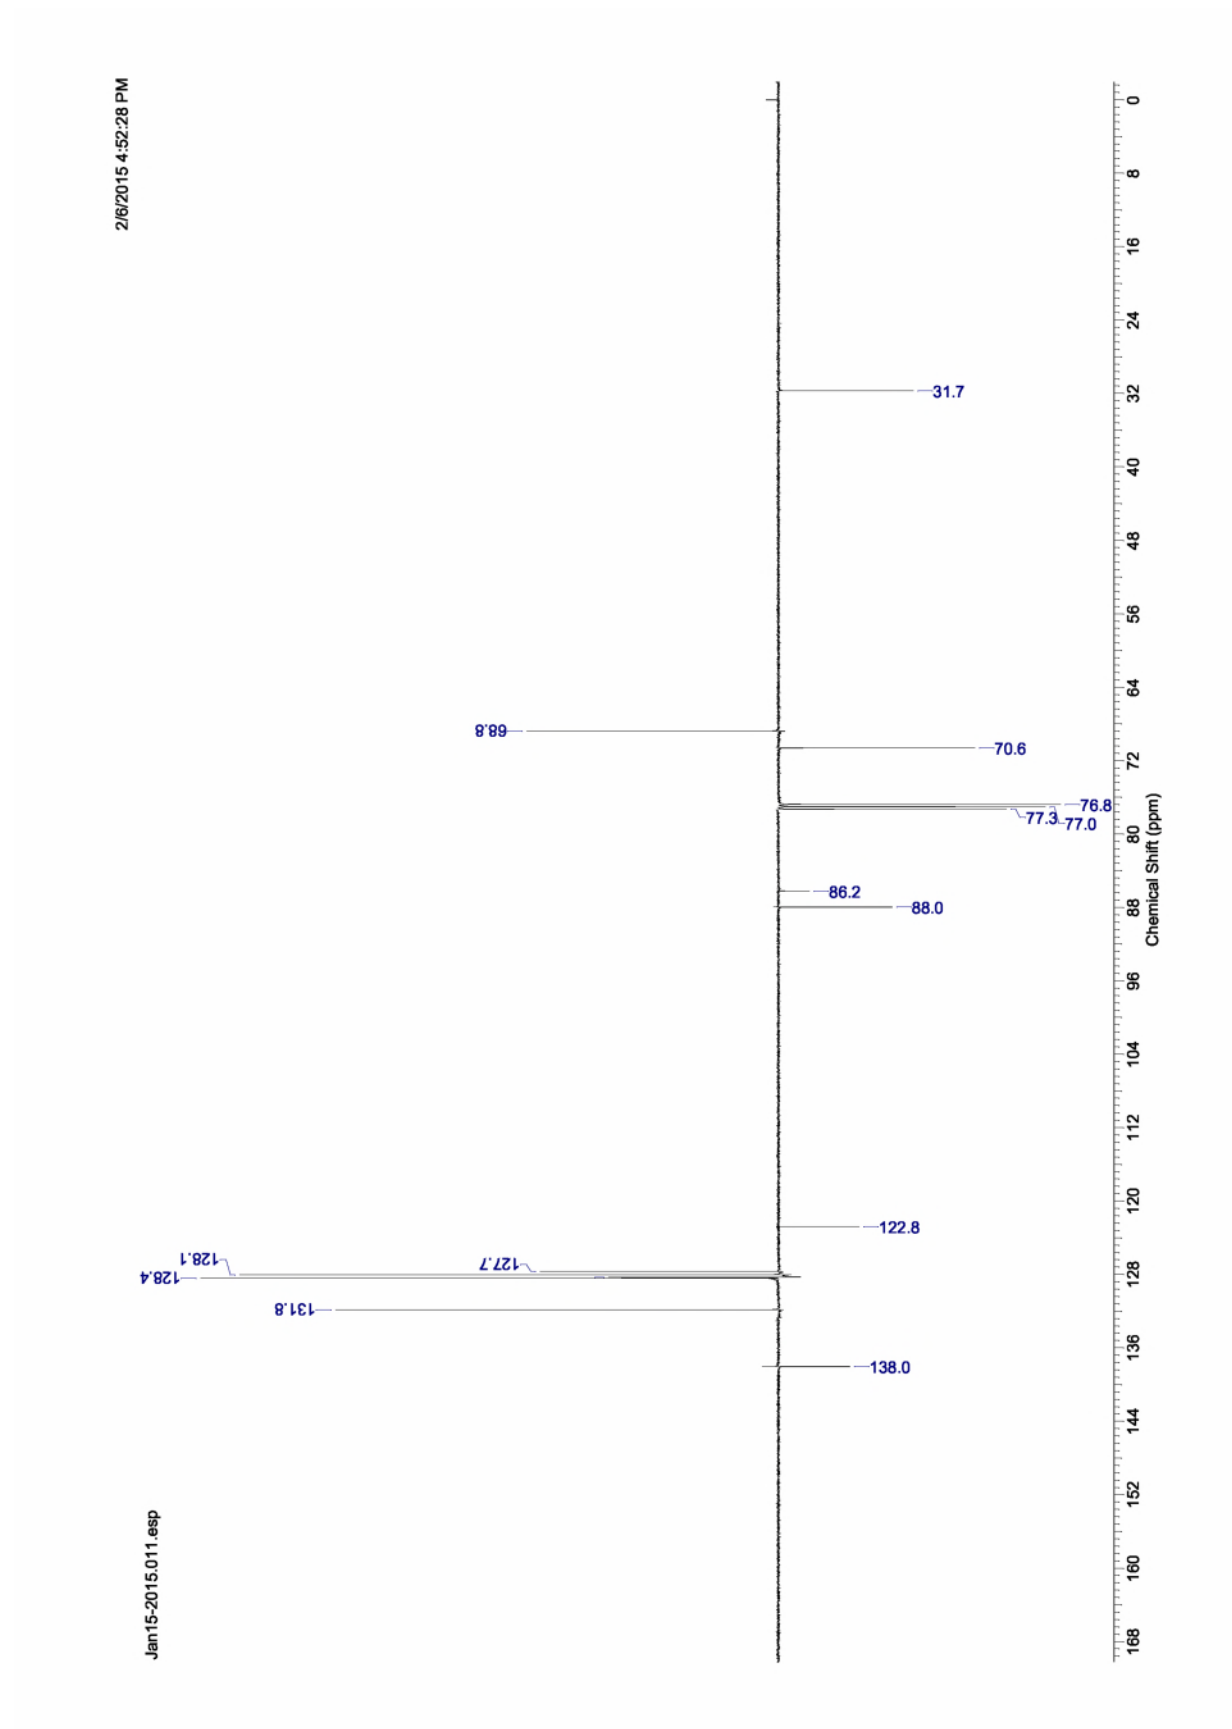

Tricarbonyl (4*S*,7*S*)-4,7-bis(benzyloxy)-1,3-diphenyl-4,5,6,7-tetrahydro-2*H*-inden-2-one iron  
18.

$\delta_H$  (500 MHz,  $CDCl_3$ )

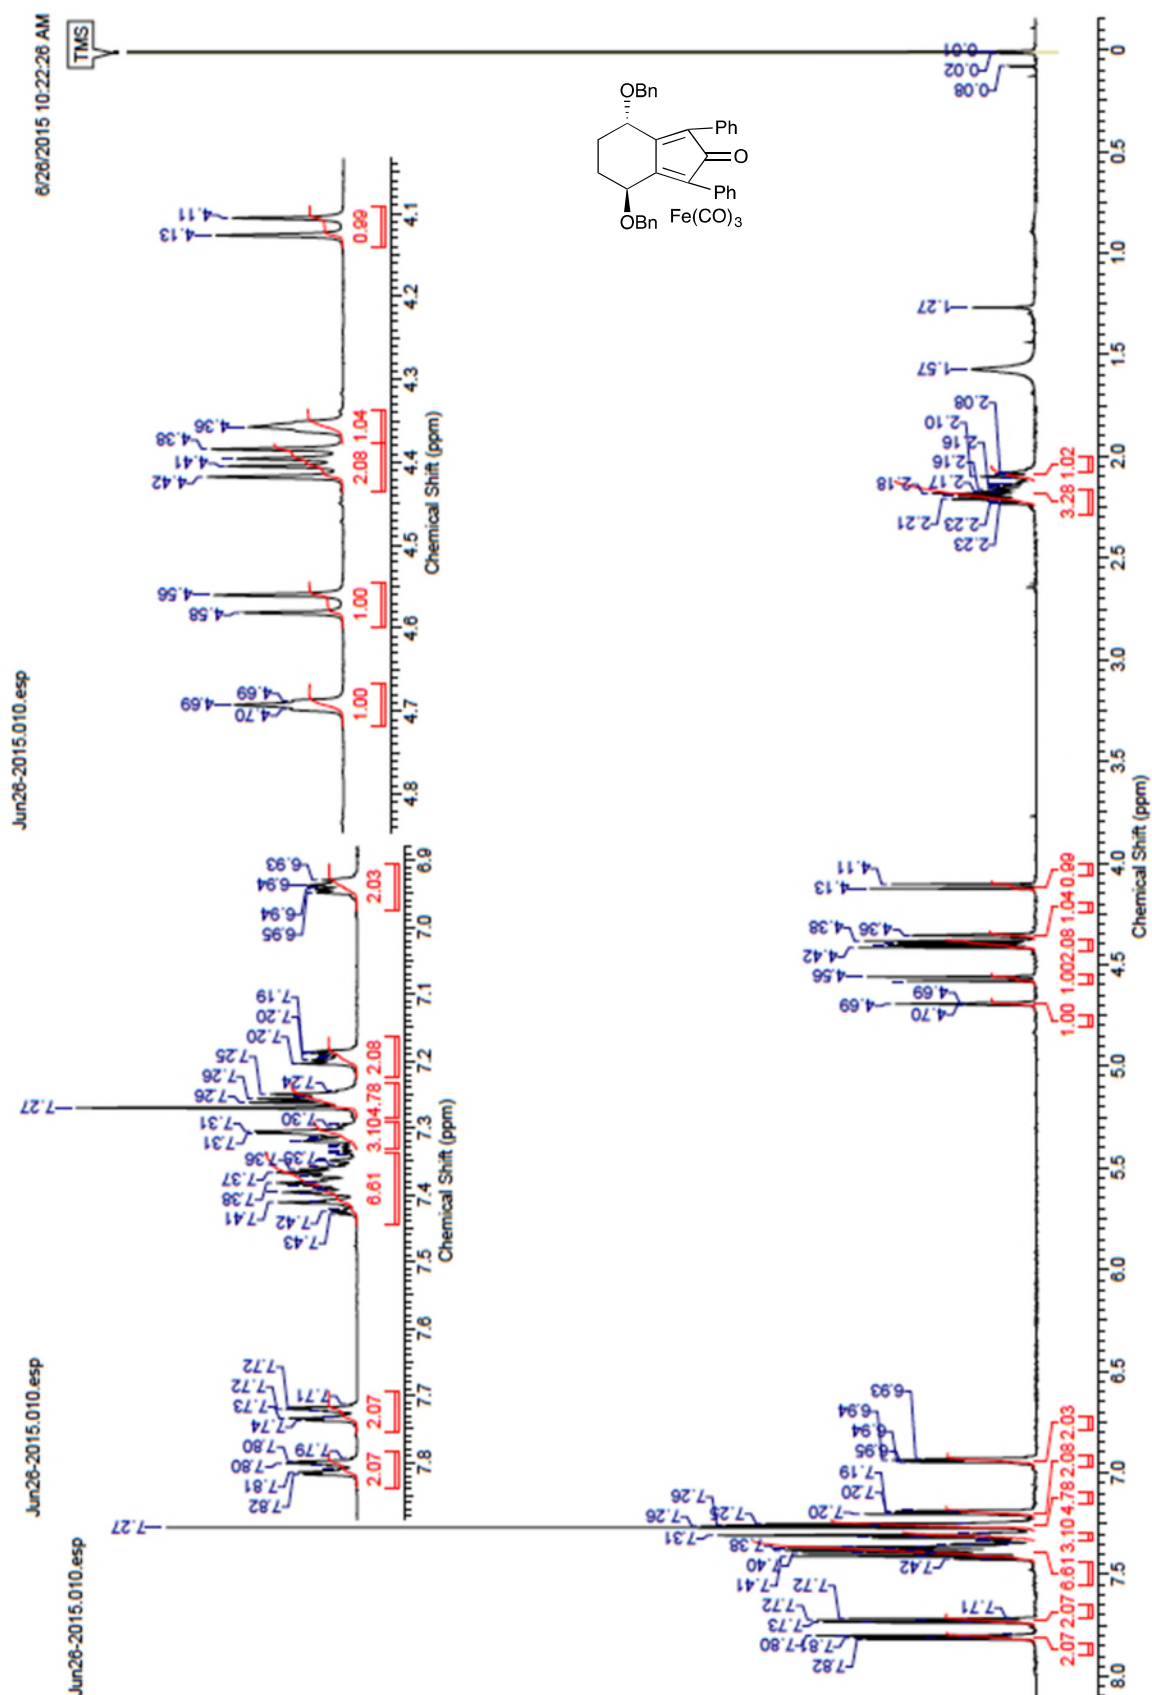

$\delta_C$  (125 MHz,  $CDCl_3$ )

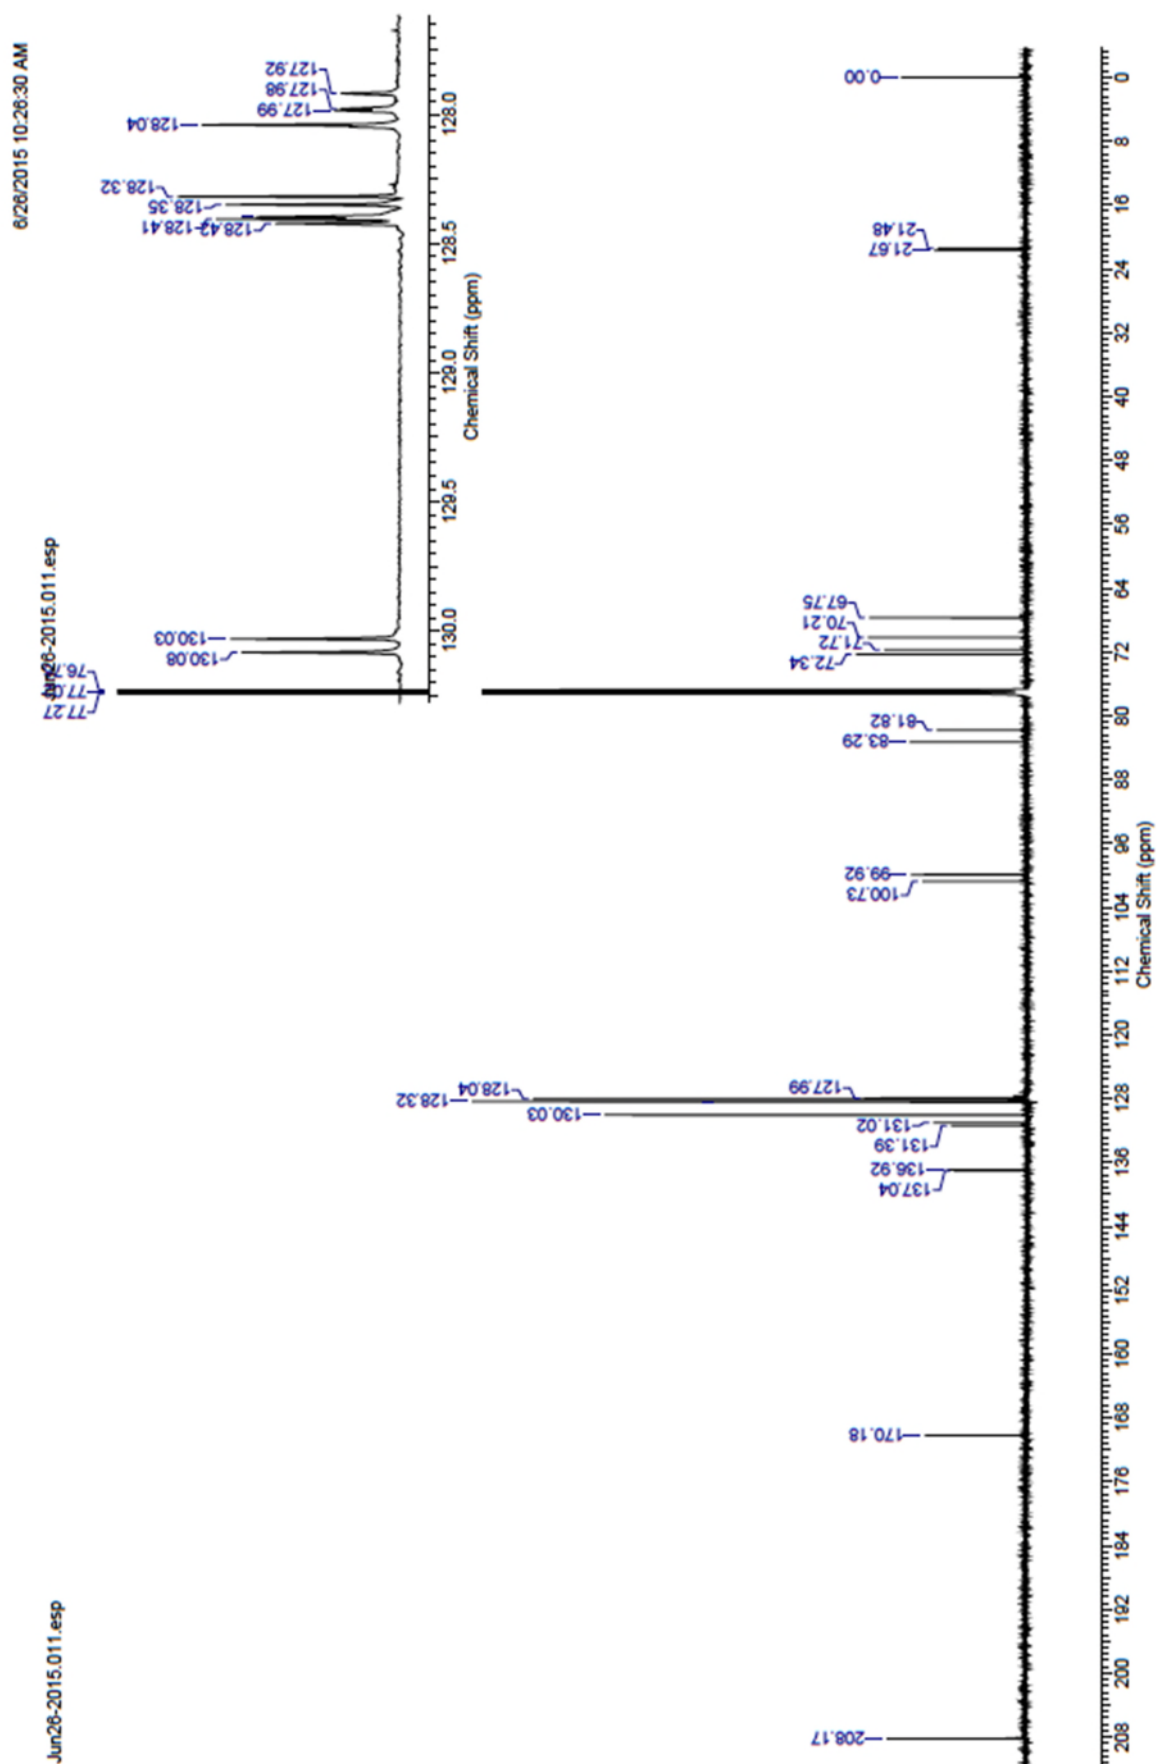

$\delta_H$  (500 MHz,  $CDCl_3$ )

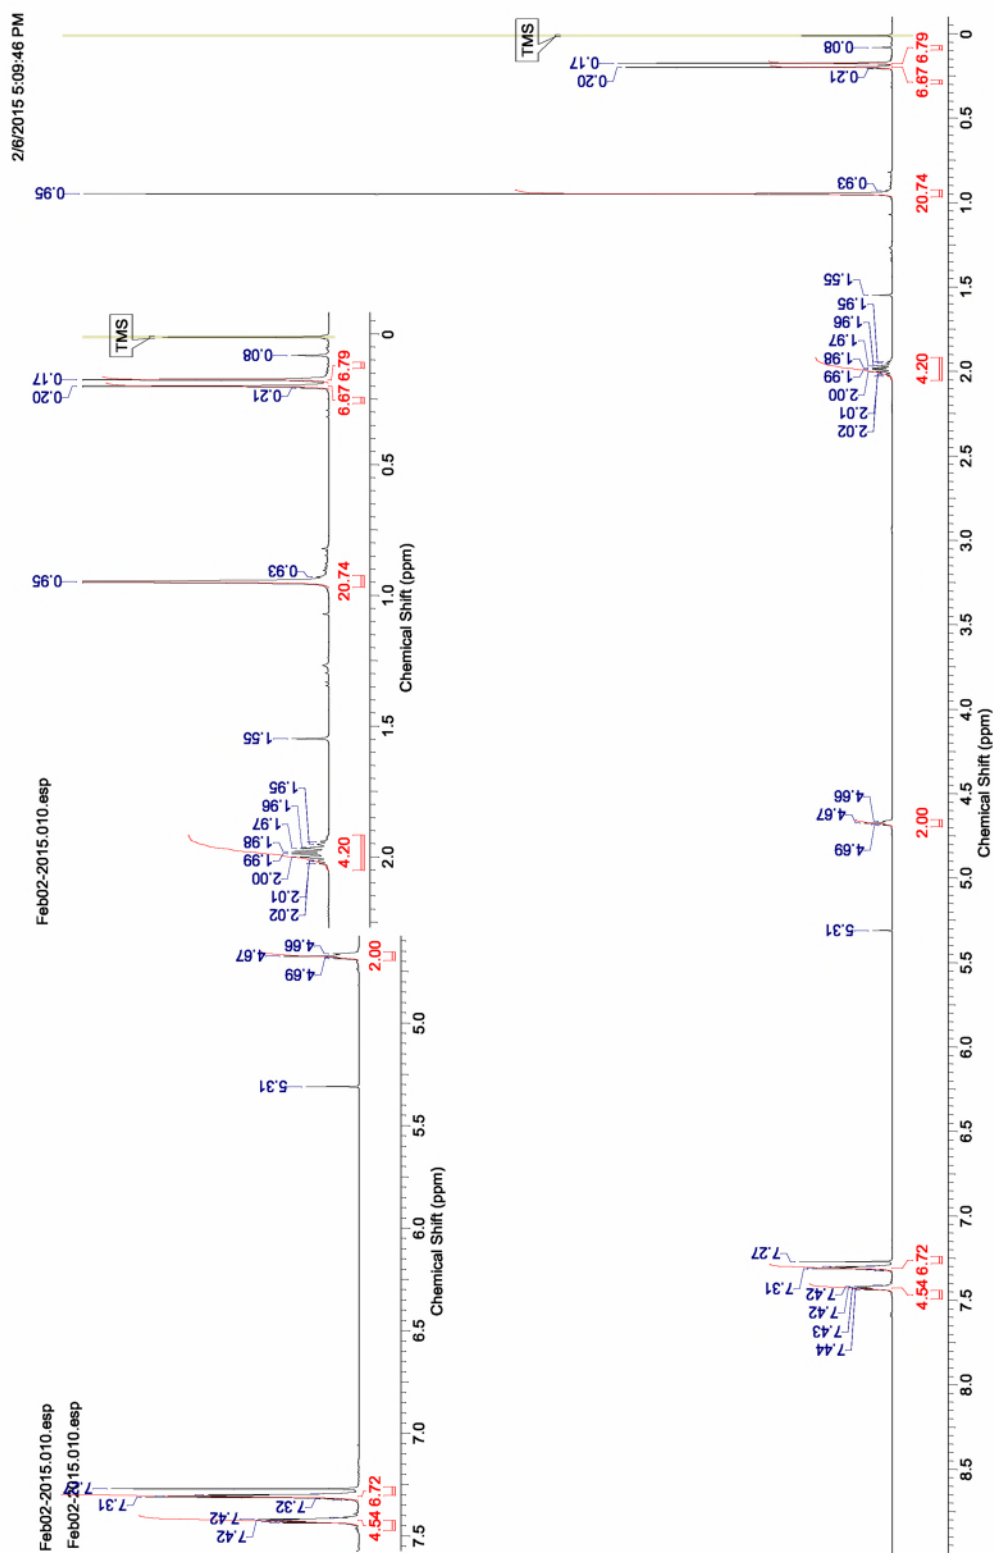

$\delta_c$  (125 MHz,  $\text{CDCl}_3$ )

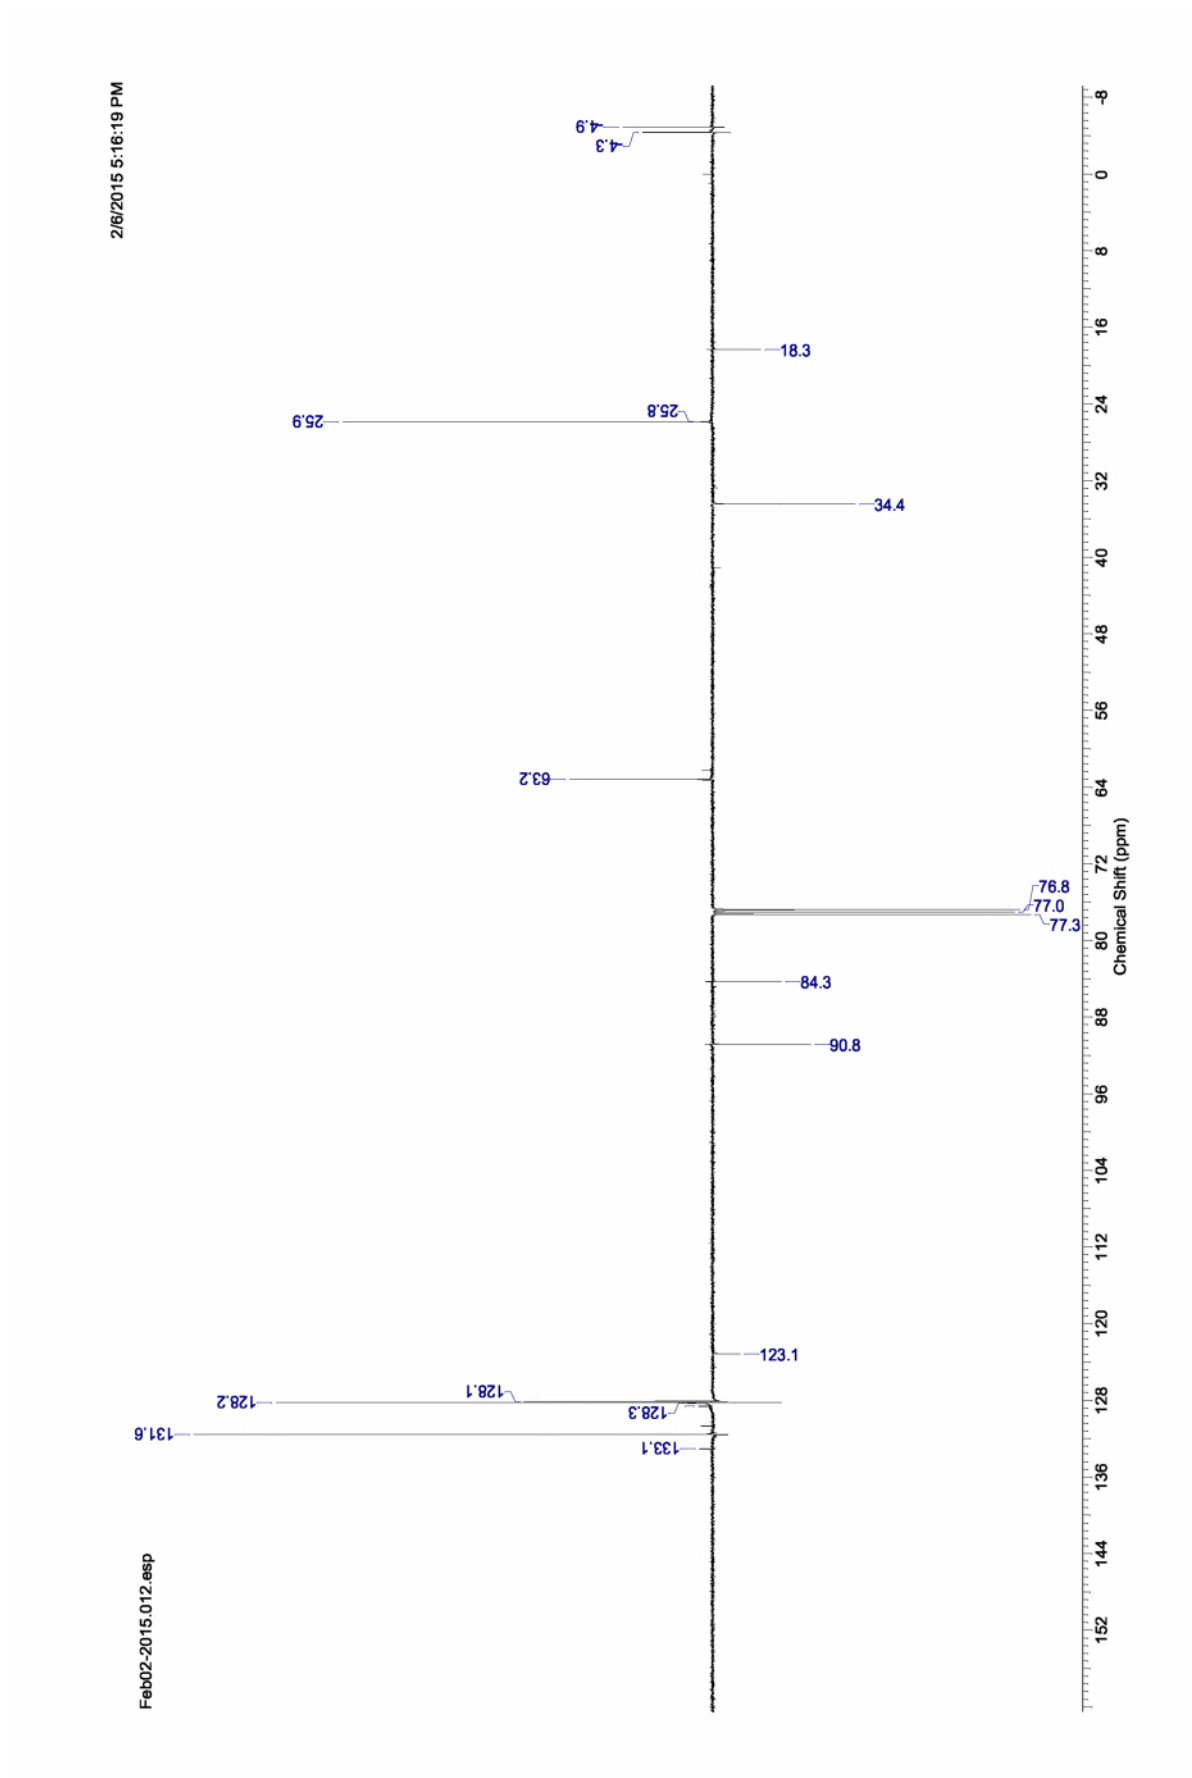

$\delta_{\text{H}}$  (500 MHz, CDCl<sub>3</sub>)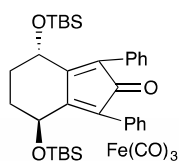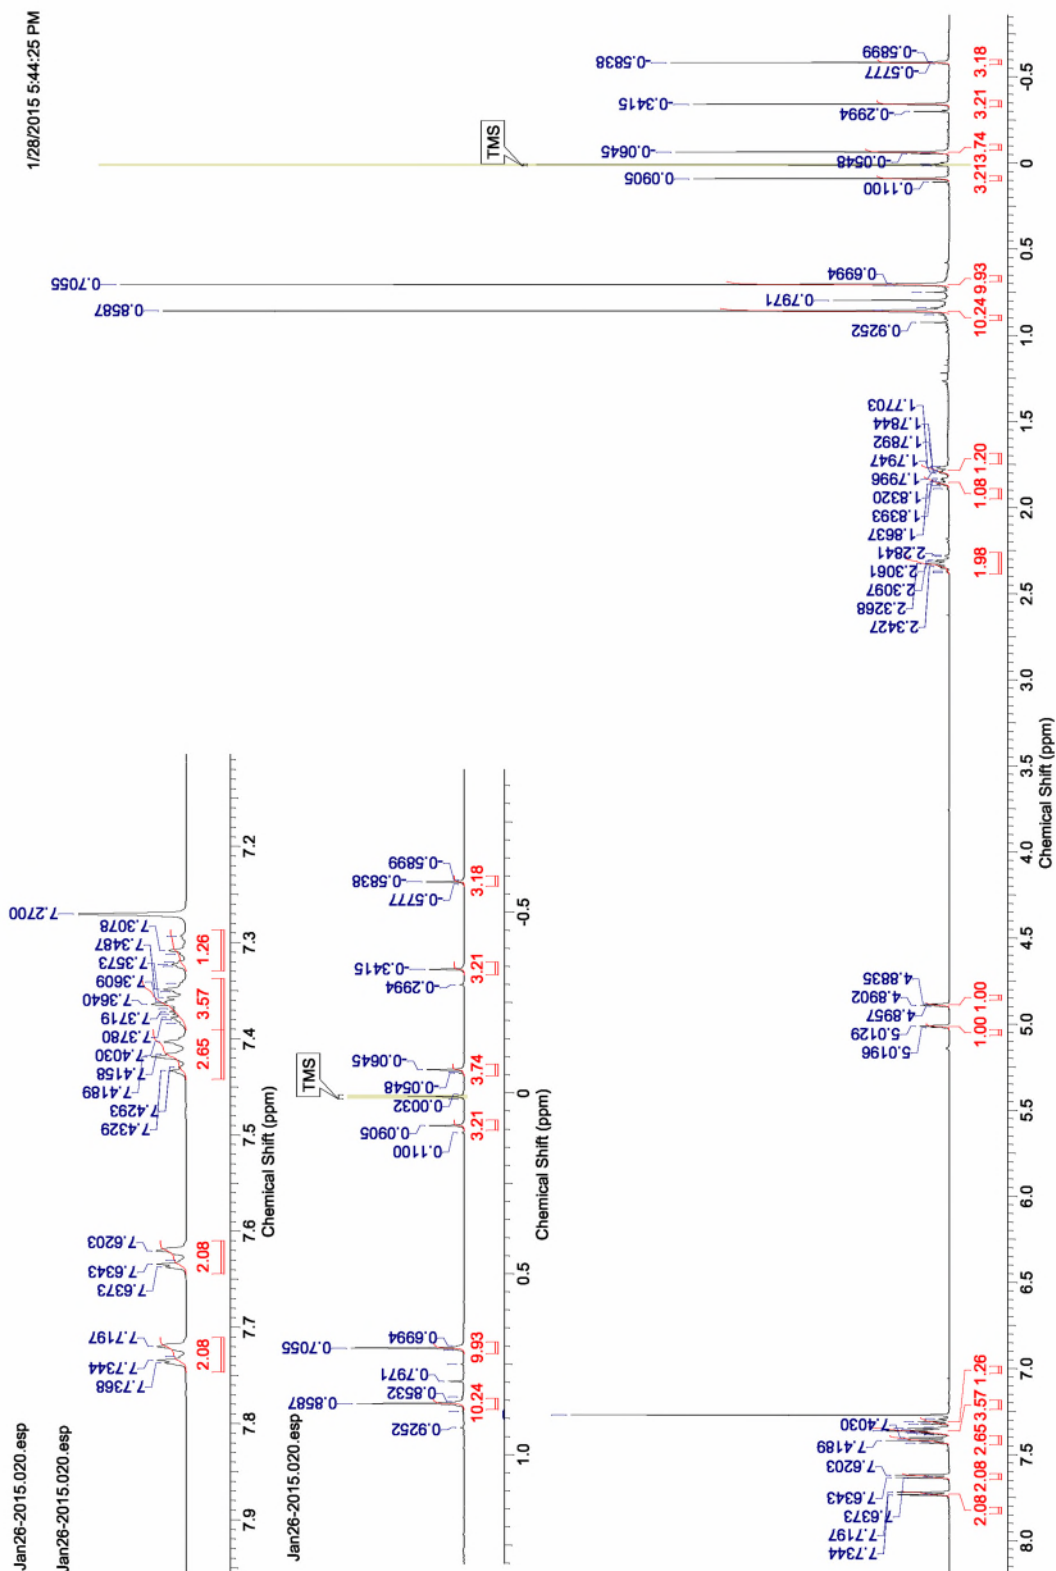

$\delta_C$  (125 MHz,  $CDCl_3$ )

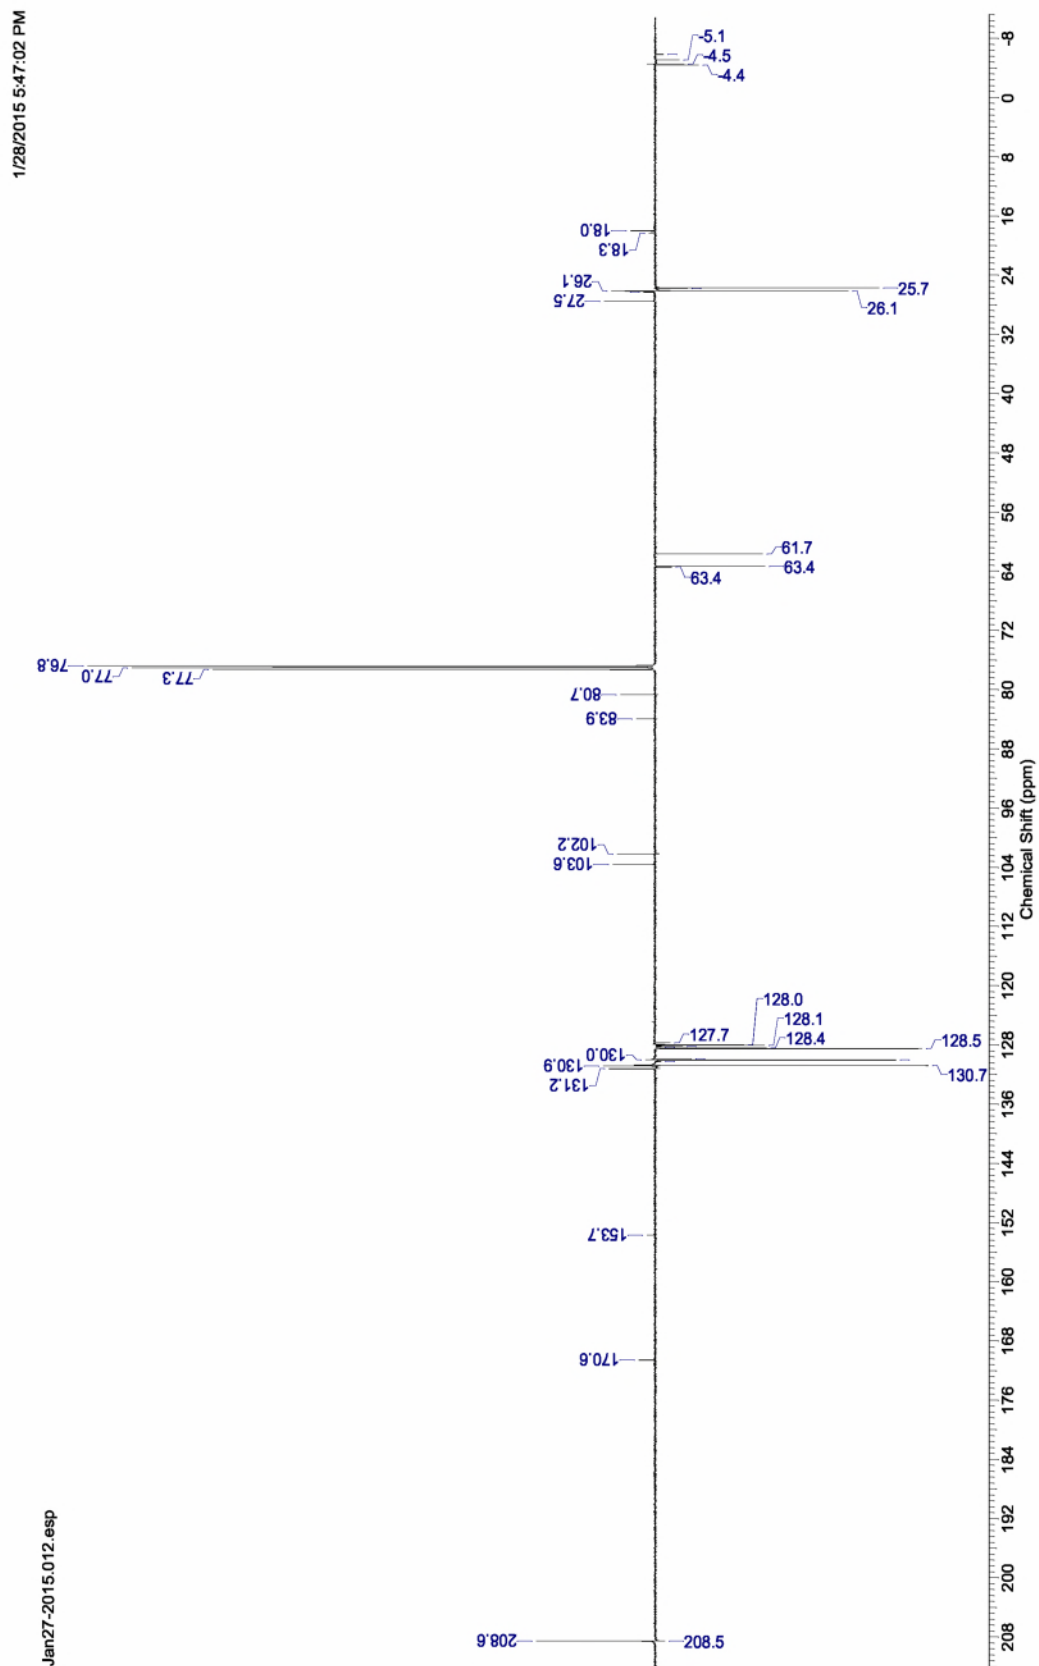



Parts of the  $^{13}\text{C}$  NMR have been expanded below.

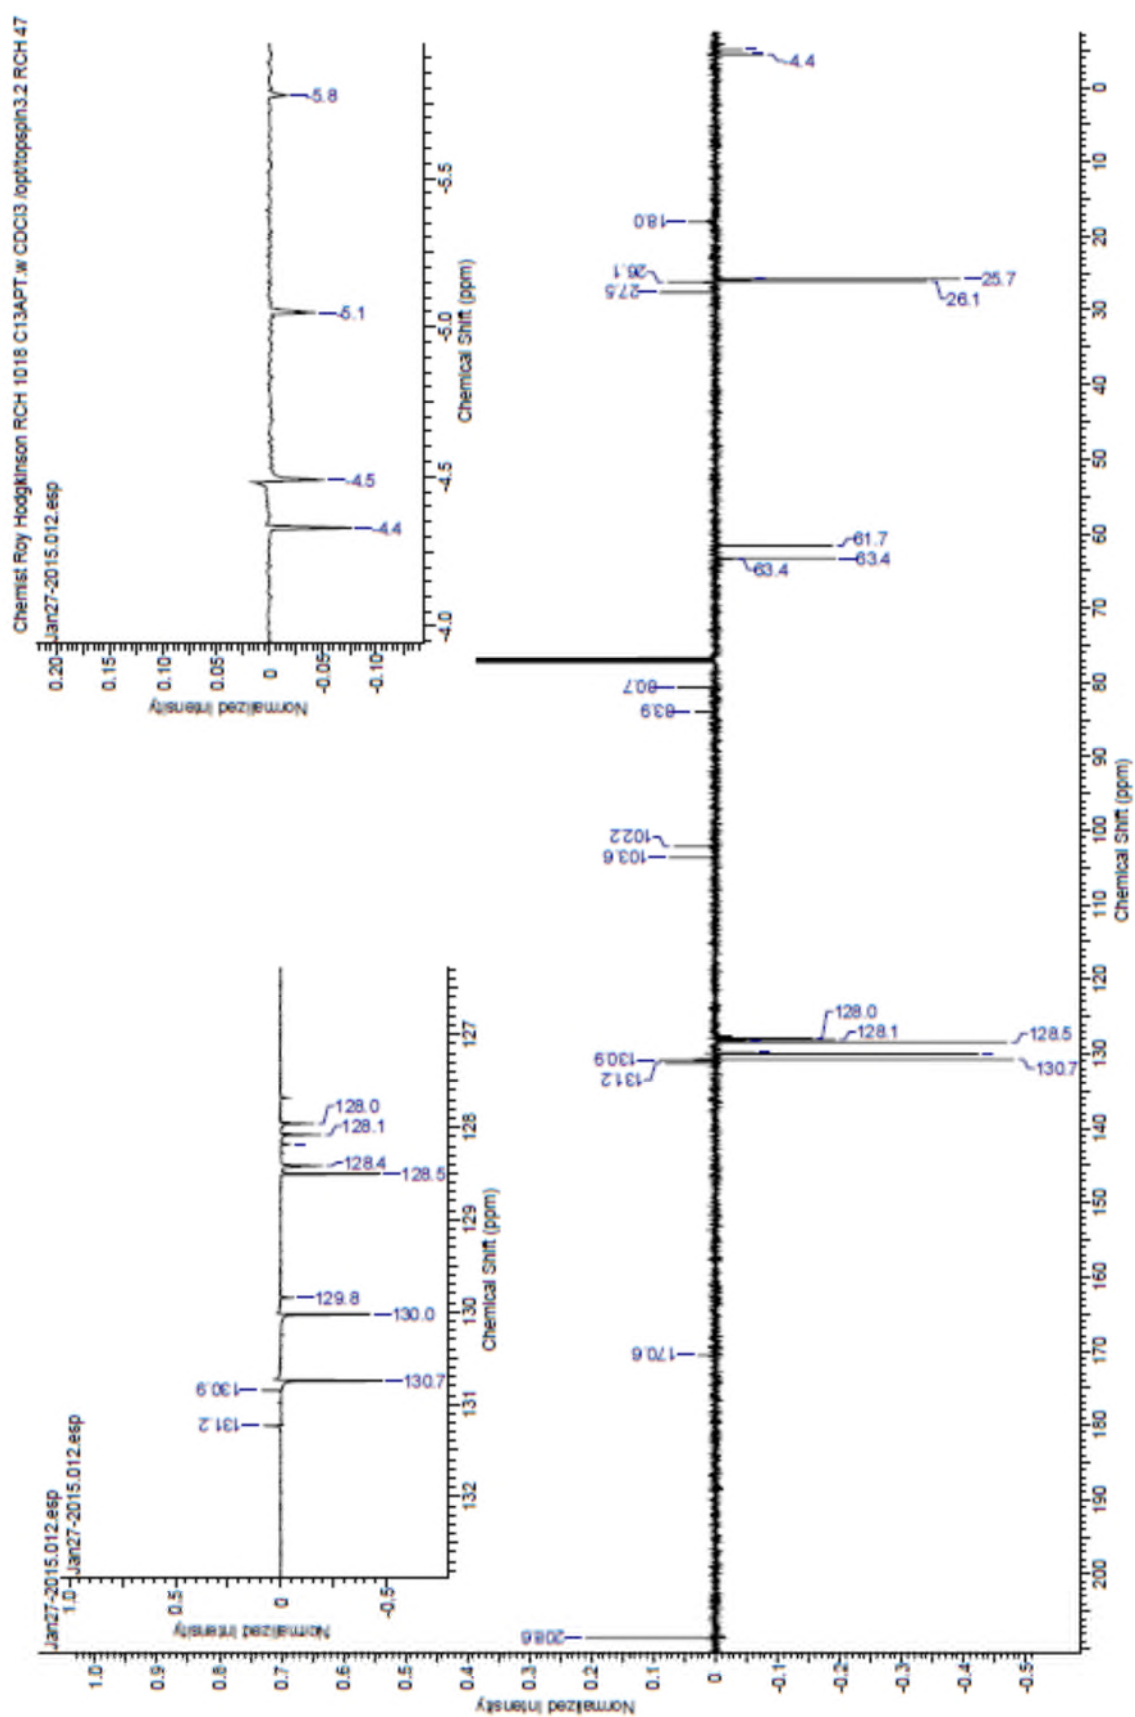

((3*S*,6*S*)-3,6-Bis(triisopropylsilyloxy)octa-1,7-diyne-1,8-diyl)dibenzene **16**.

$\delta_H$  (500 MHz,  $CDCl_3$ )

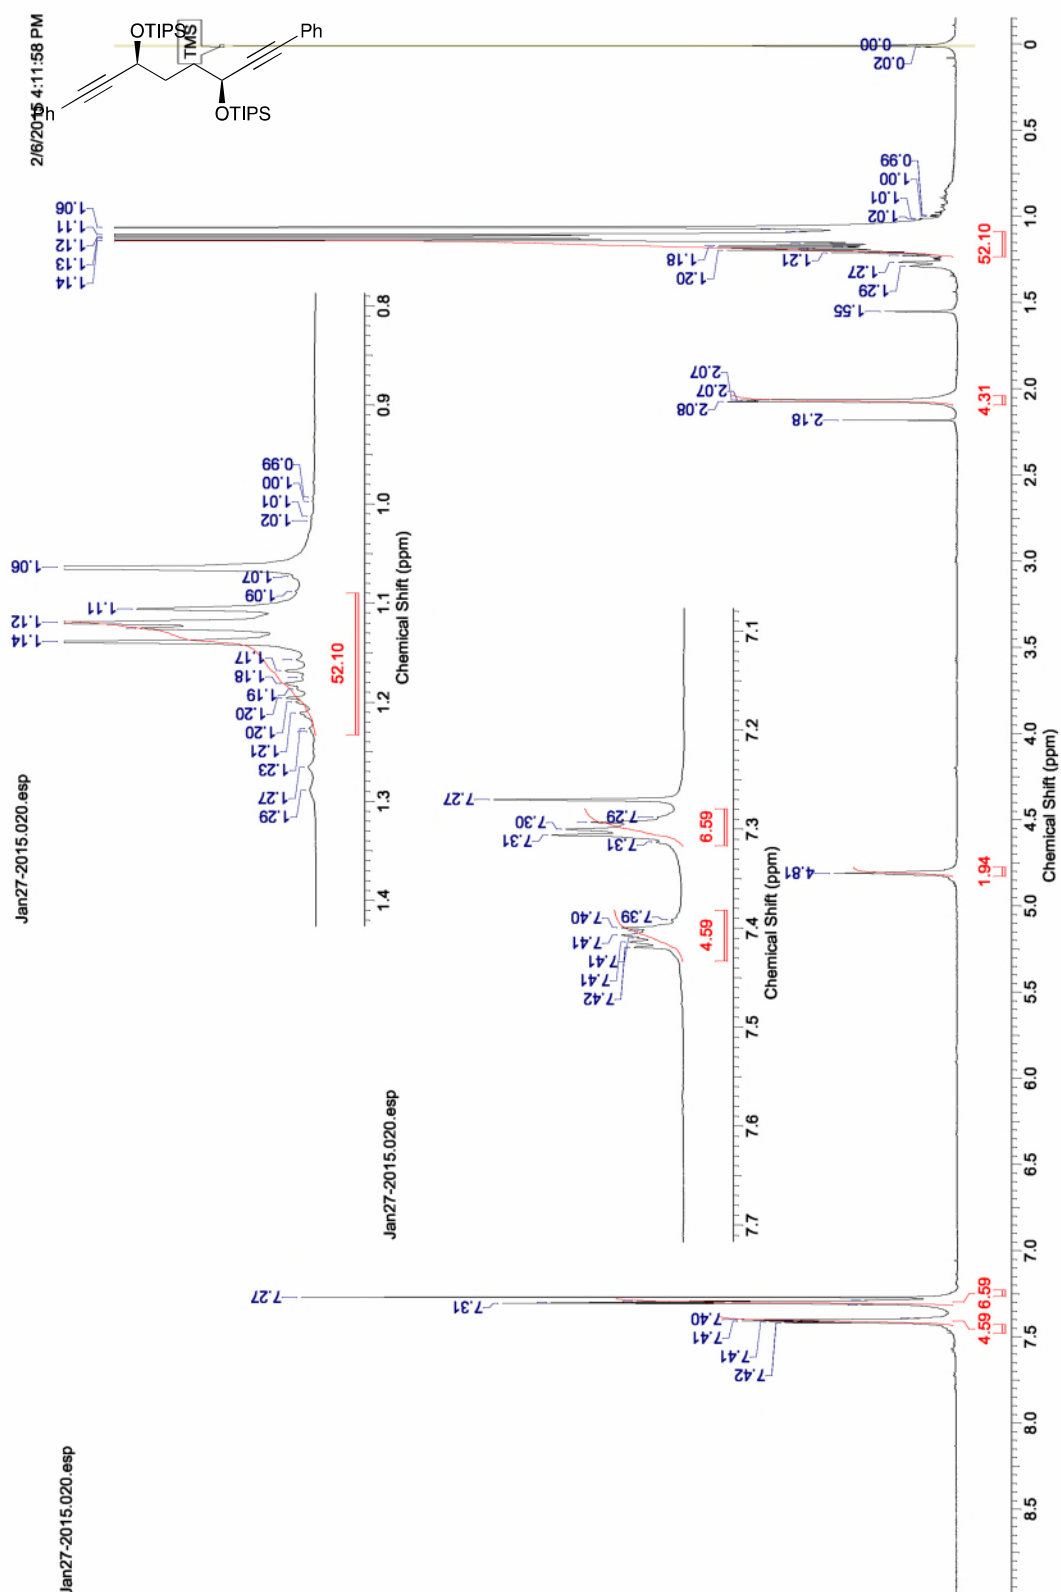

$\delta_C$  (125 MHz,  $CDCl_3$ )

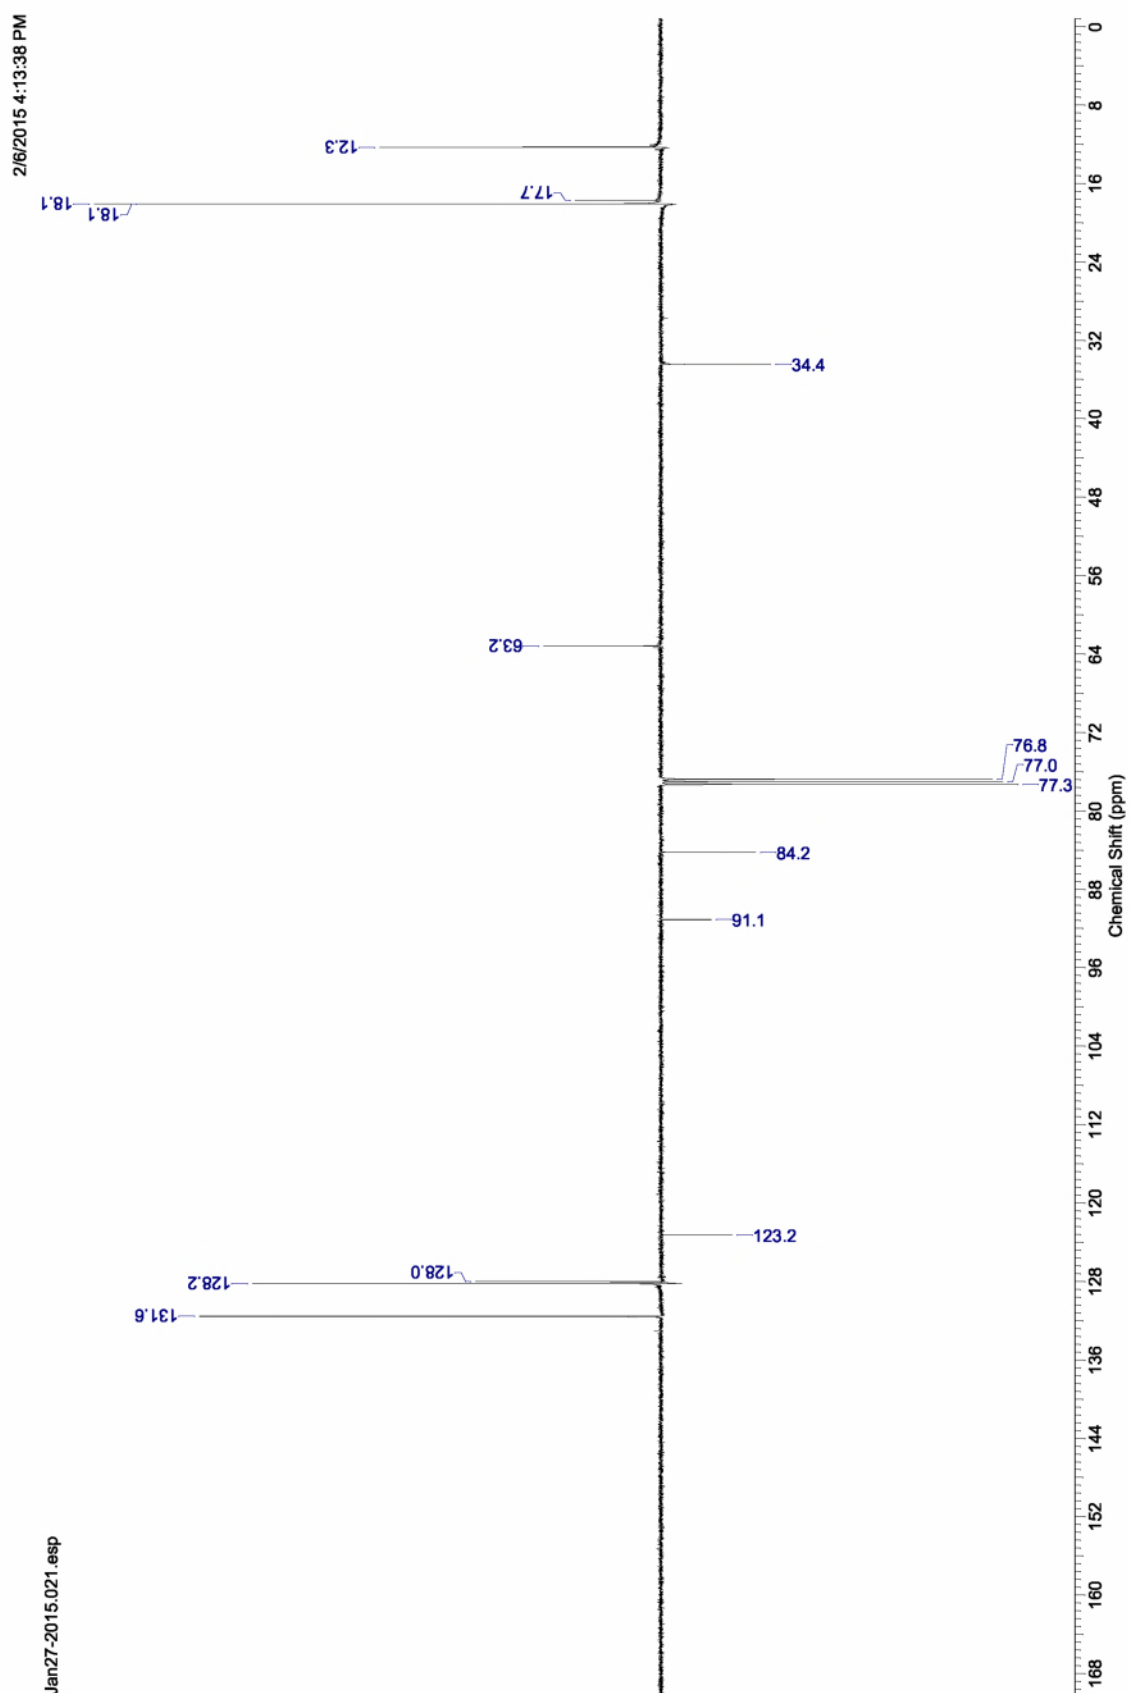

$\delta_{\text{H}}$  (500 MHz,  $\text{CDCl}_3$ )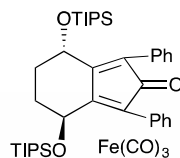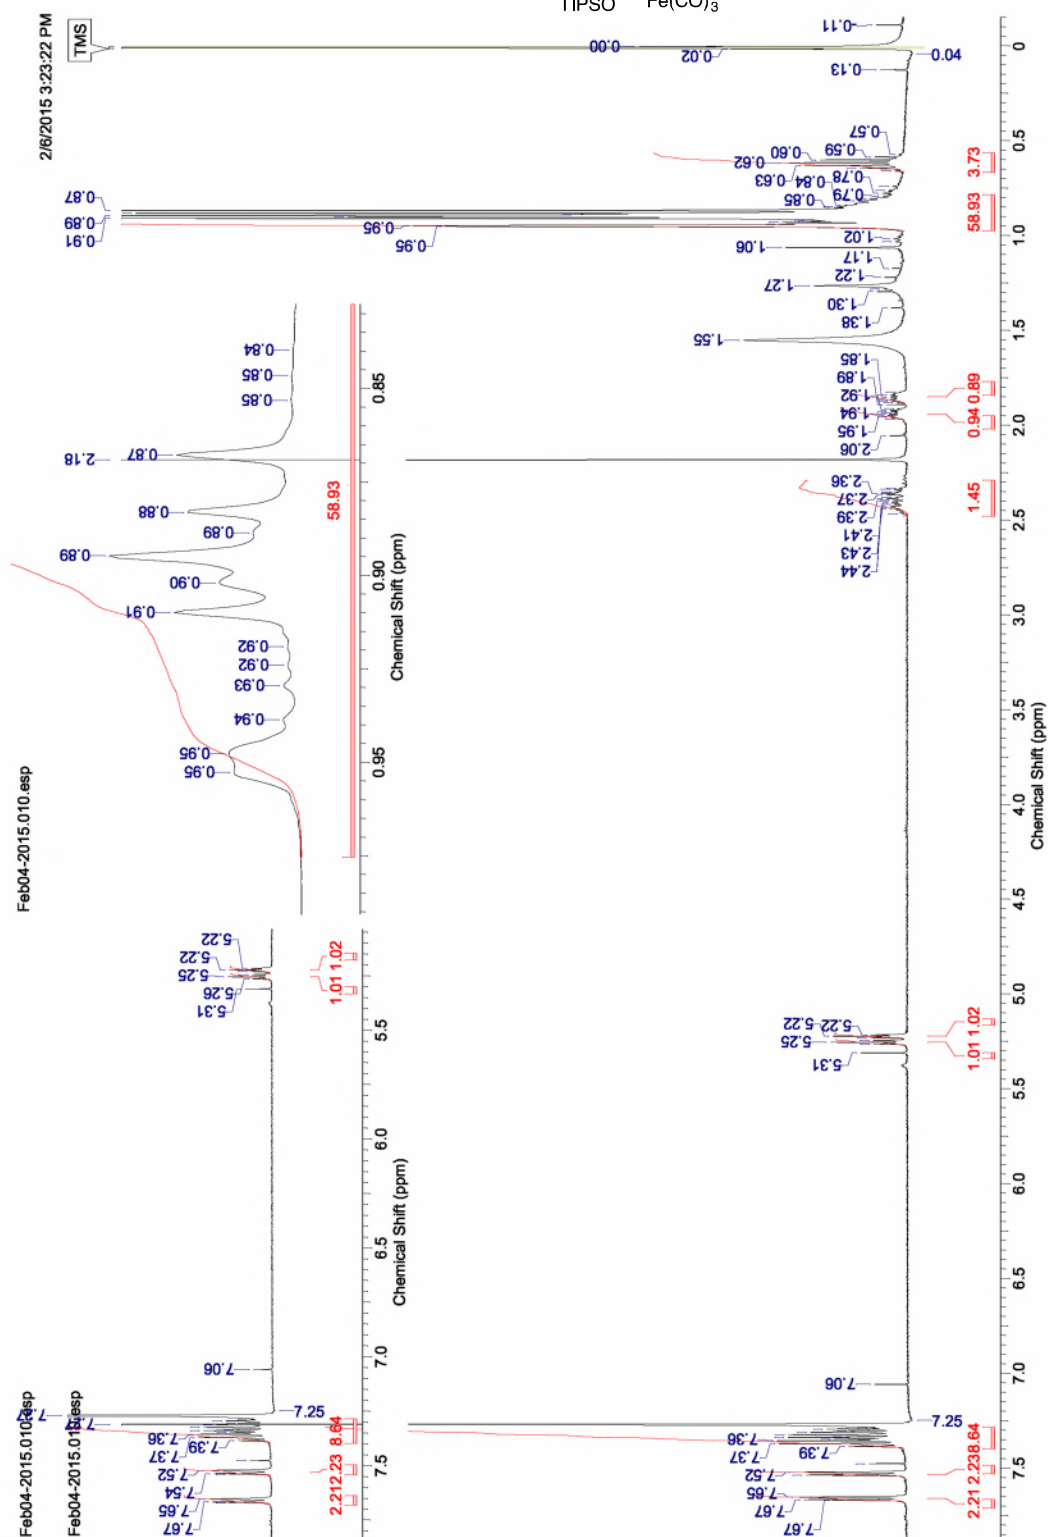

$\delta_C$  (125 MHz,  $CDCl_3$ )

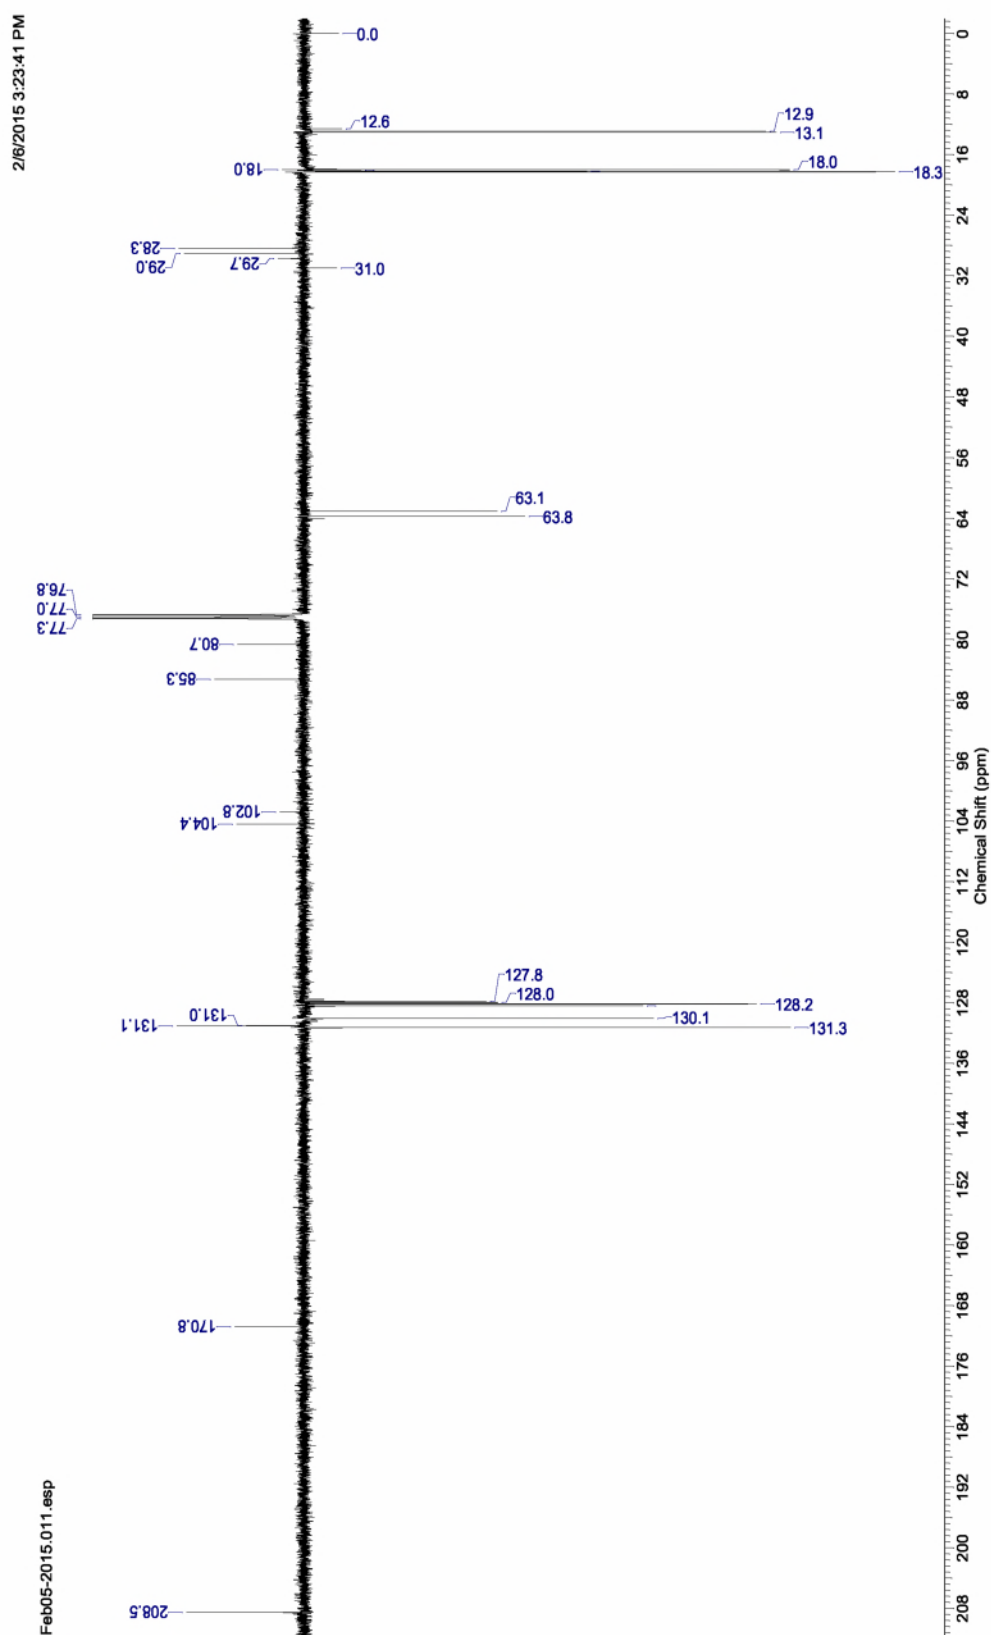

((3*S*,6*S*)-3,6-Bis(dimethylphenylsilyloxy)octa-1,7-diyne-1,8-diyl)dibenzene **17**.

$\delta_H$  (500 MHz,  $CDCl_3$ )

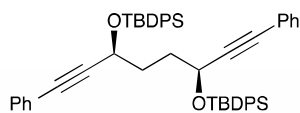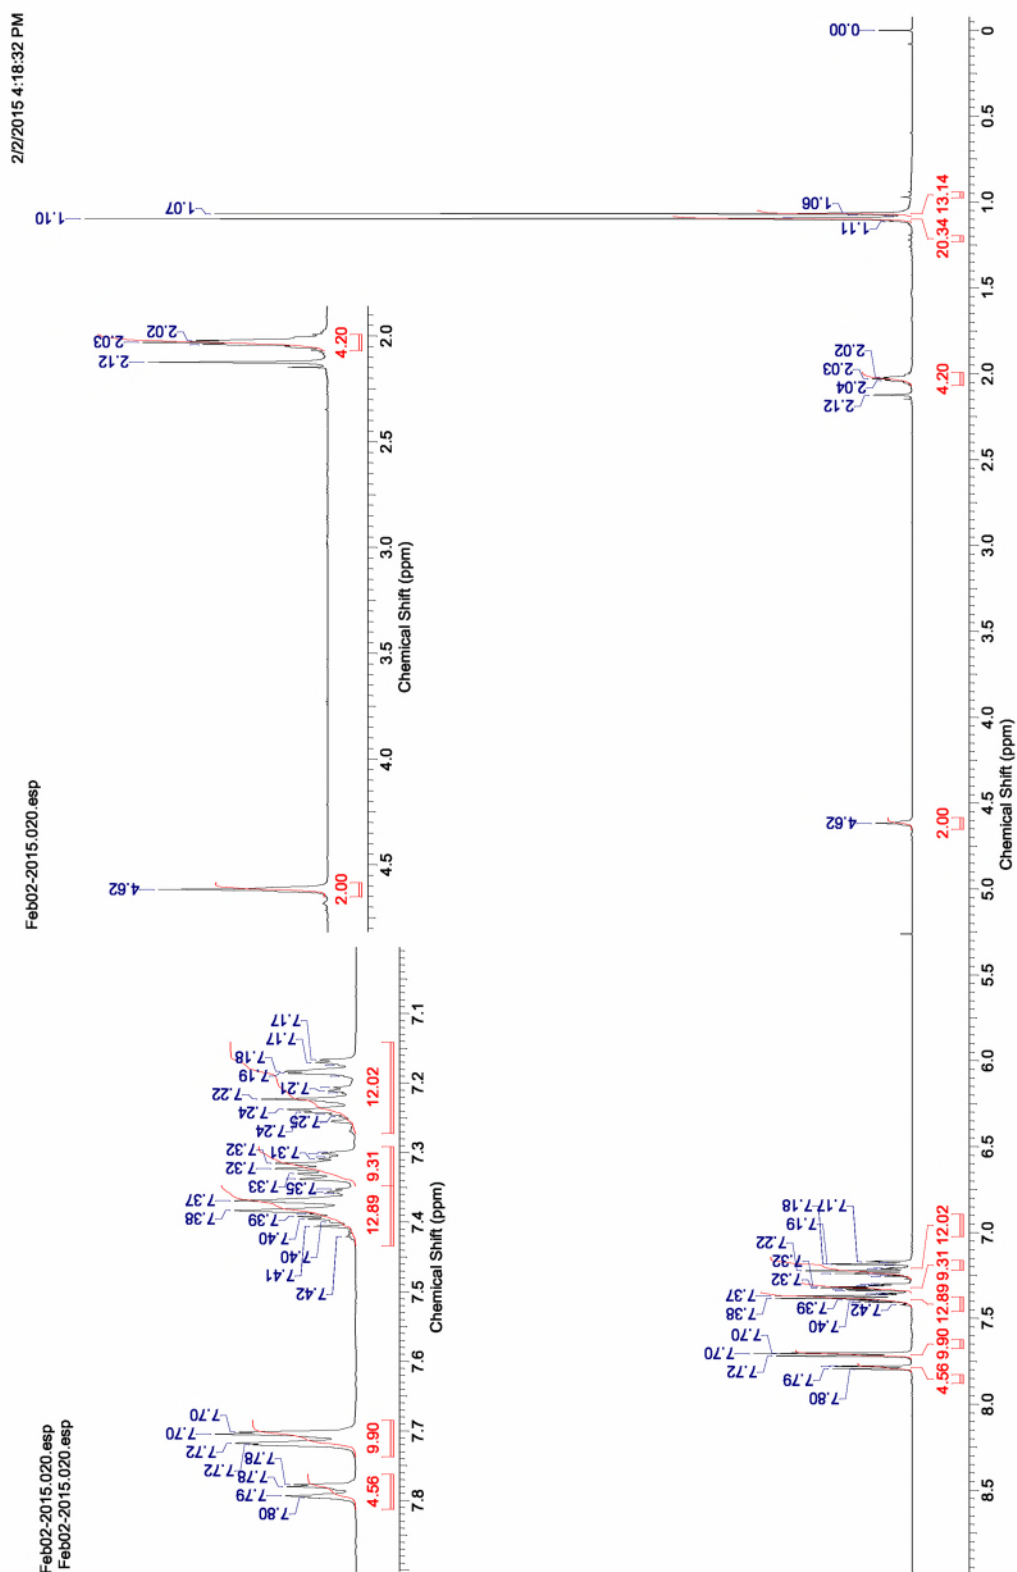

4/2/2015 3:50:27 PM

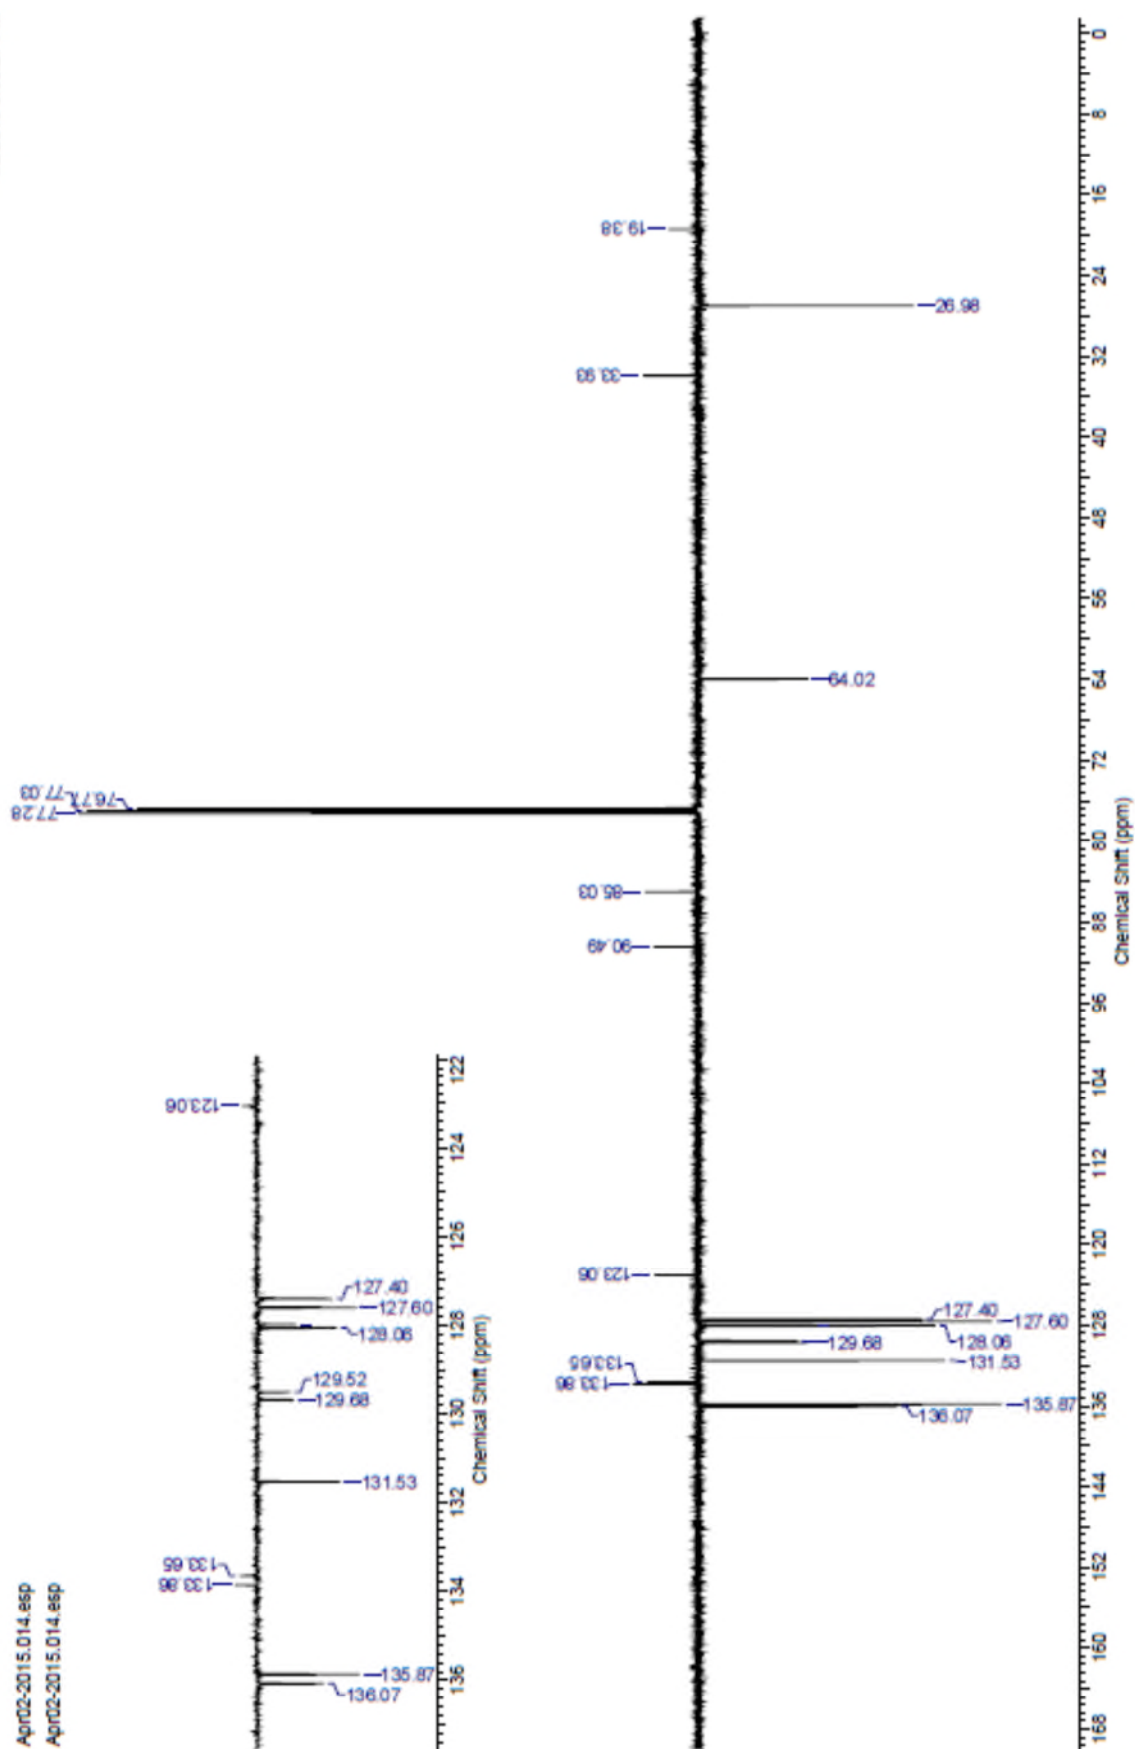

Tricarbonyl ((4*S*,7*S*)-4,7-bis((tert-butyl)phenylsilyl)oxy)-1,3-diphenyl-4,5,6,7-tetrahydro-2*H*-inden-2-one) iron **21**.

$\delta_H$  (500 MHz,  $CDCl_3$ )

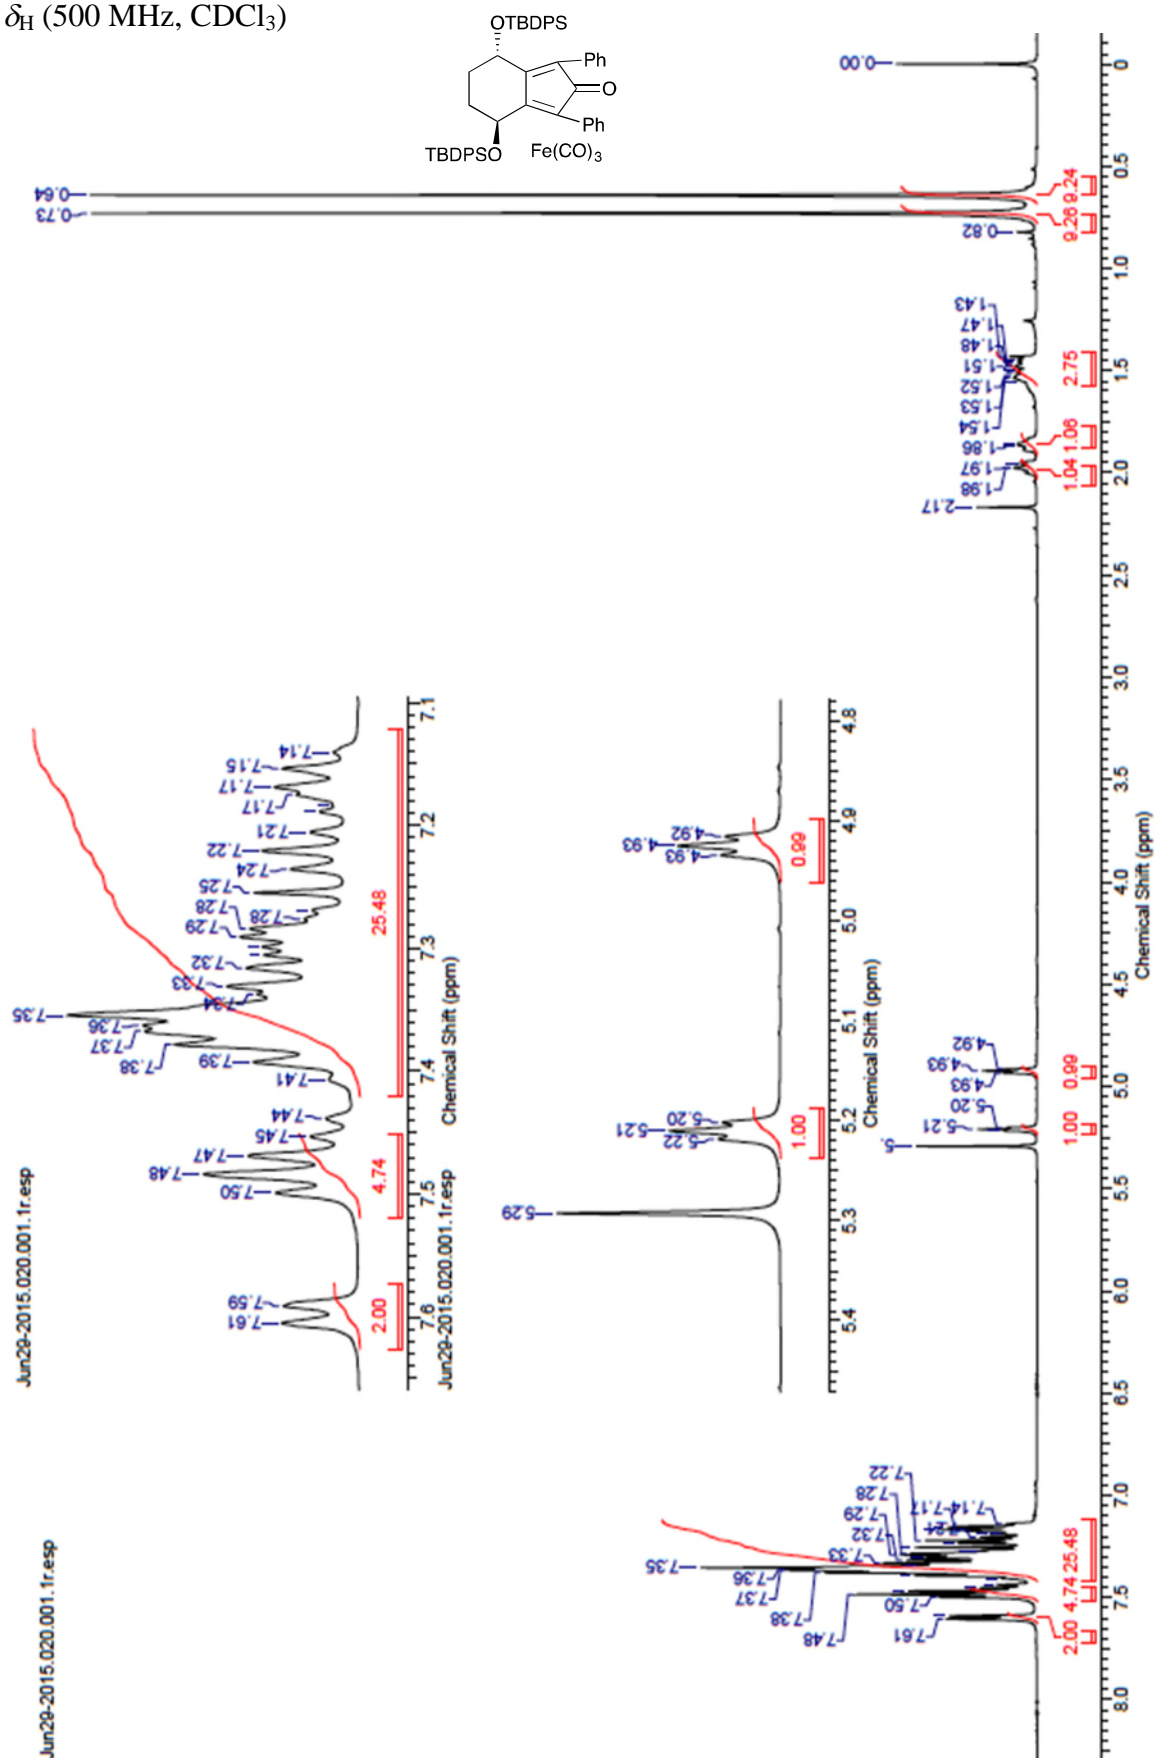



$\delta_{\text{C}}$  (125 MHz,  $\text{CDCl}_3$ )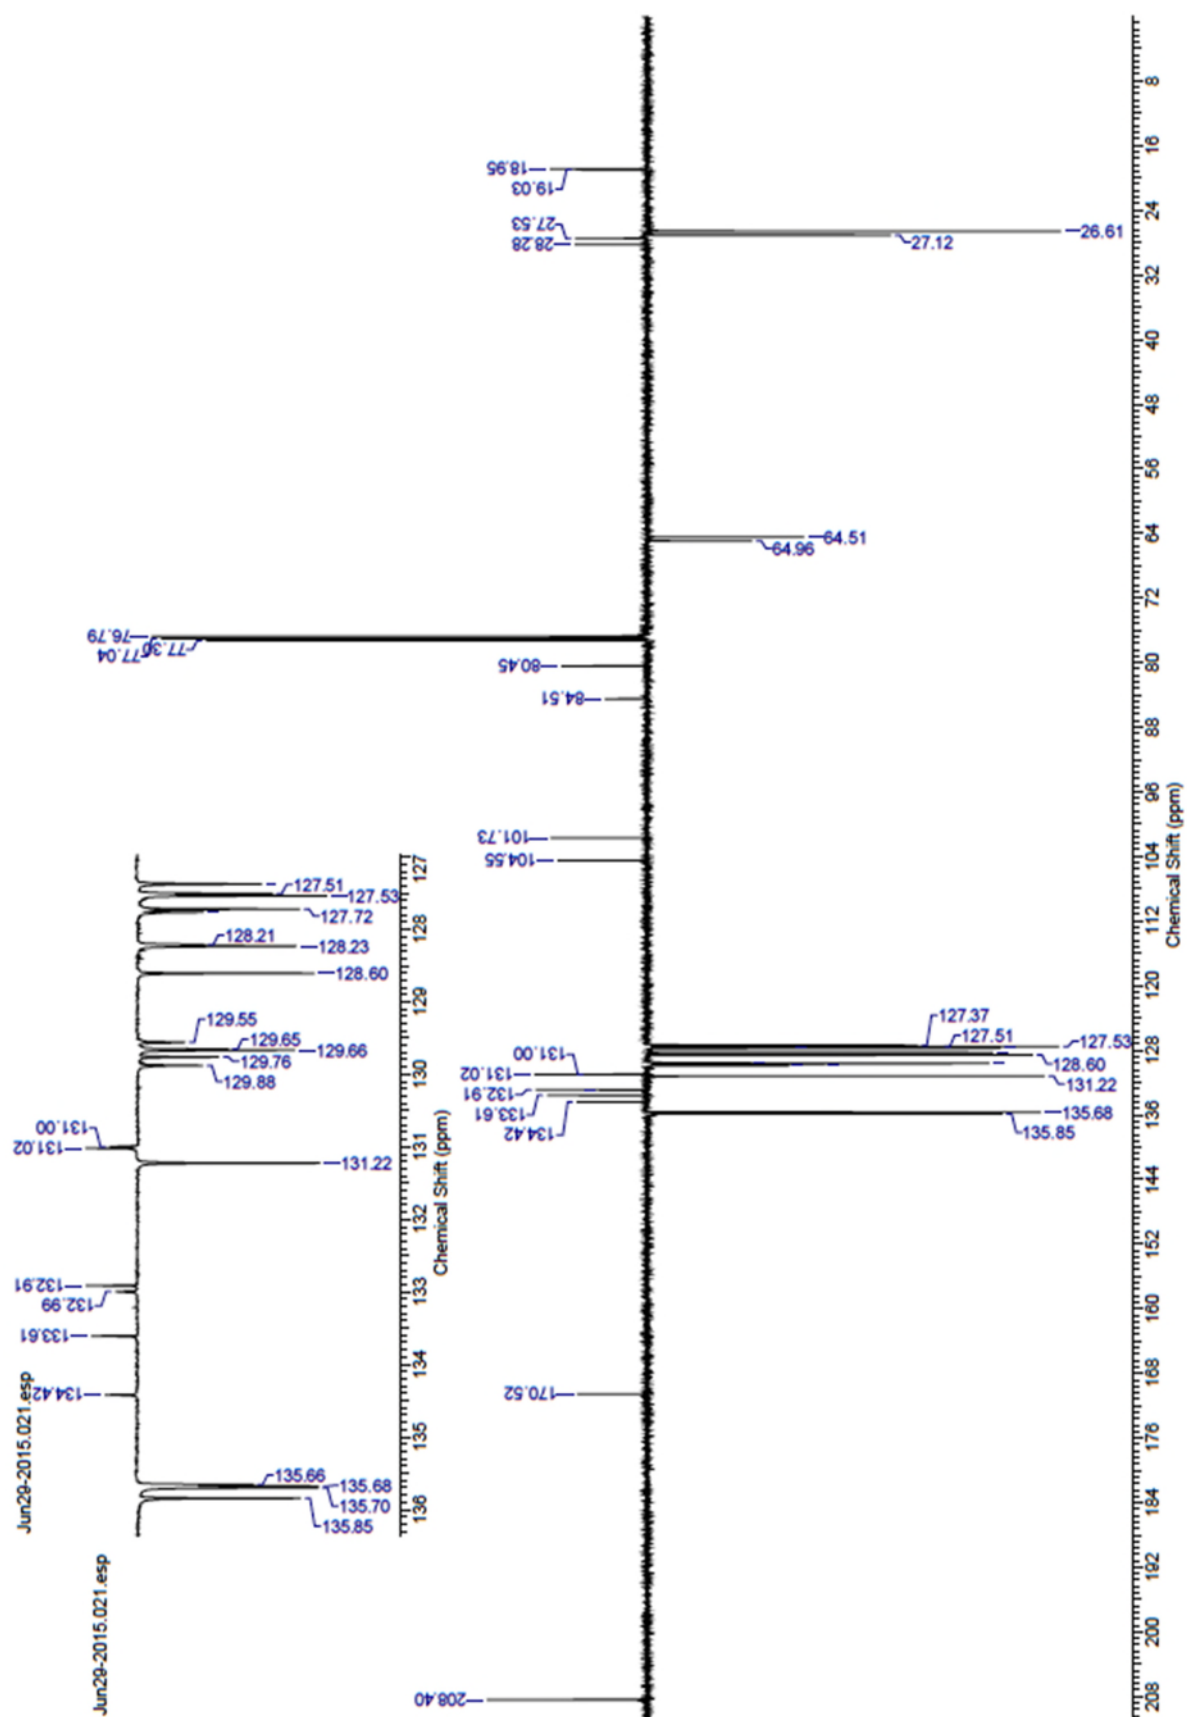

((S)-N,N-Dimethyldinaphtho[2,1-d:1',2'-f][1,3,2]dioxaphosphepin-4-amine  
MONOPHOS).

((S)-

$\delta_H$  (500 MHz,  $CDCl_3$ )

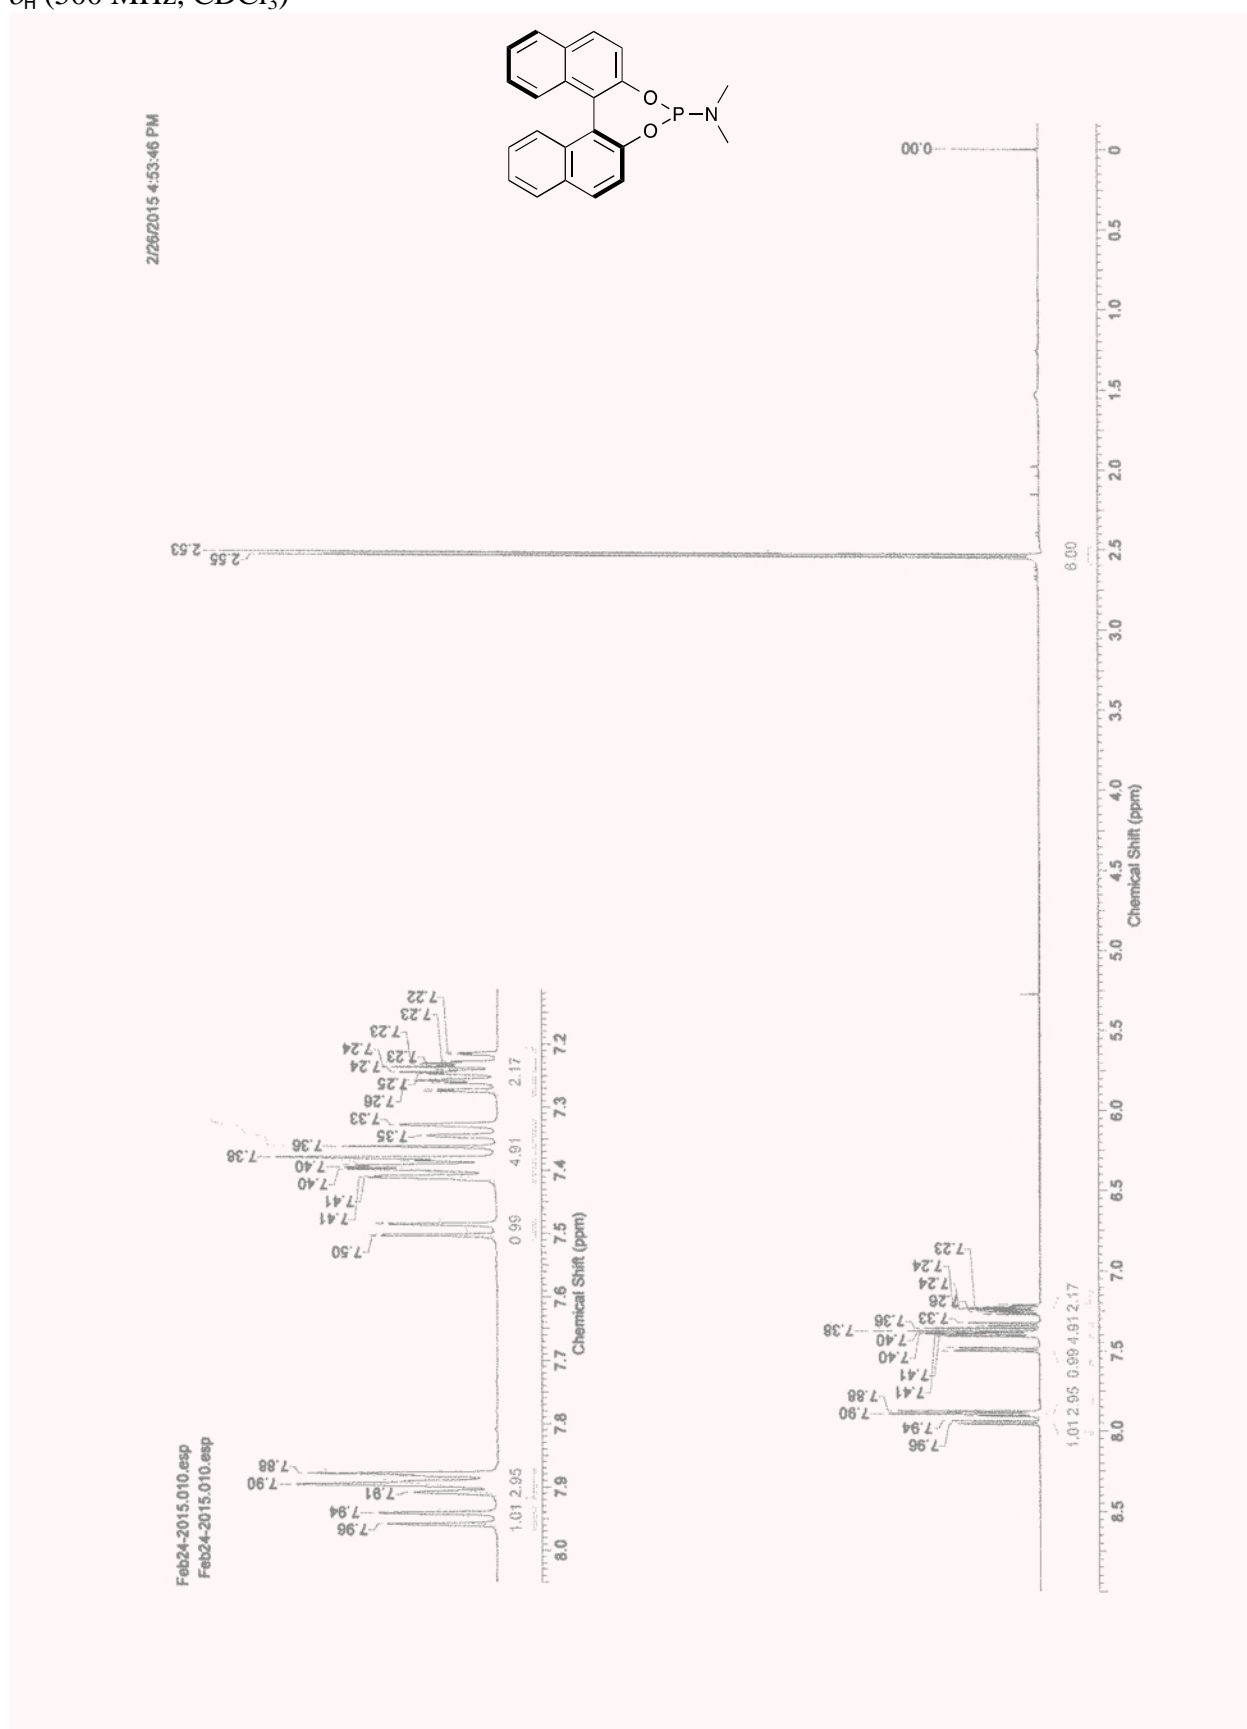

$\delta_C$  (125 MHz,  $CDCl_3$ )

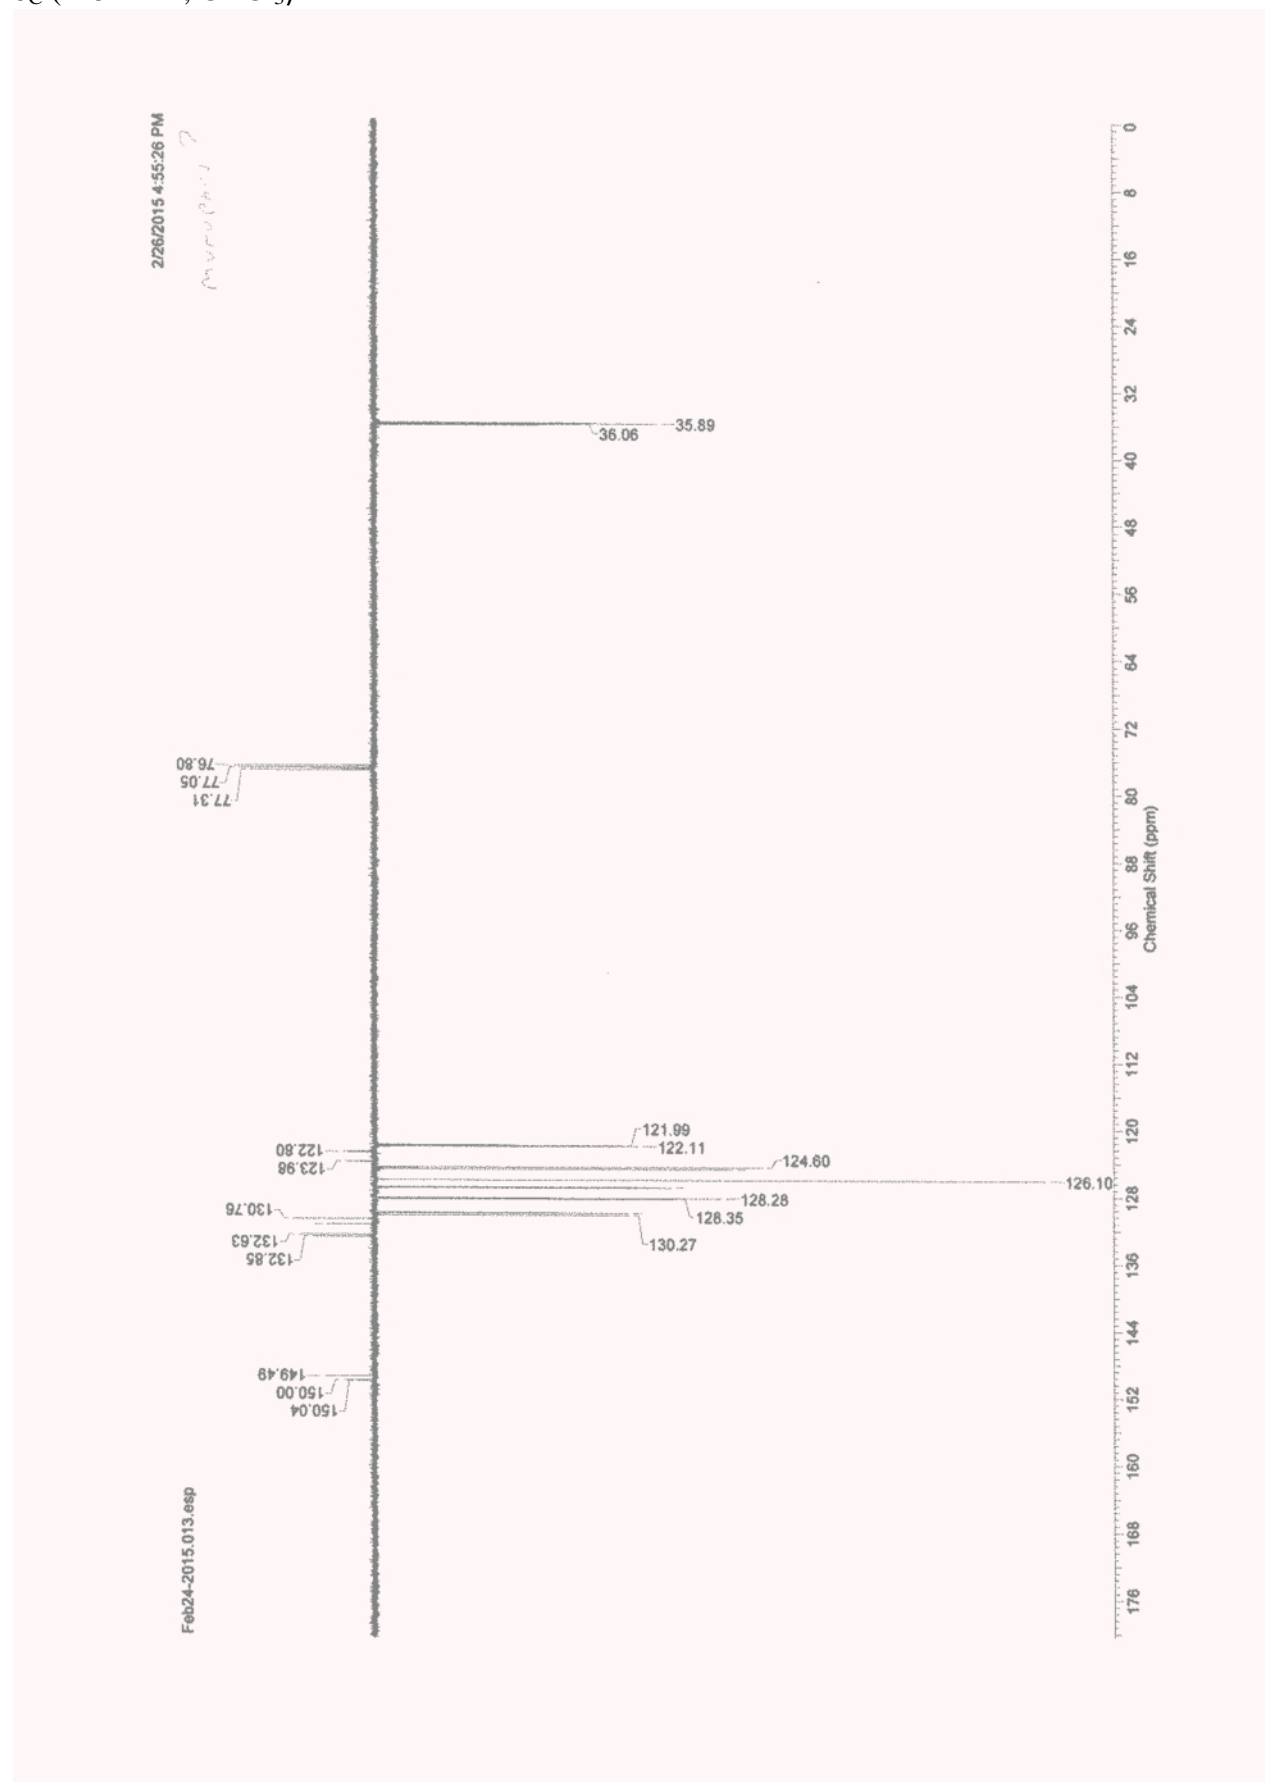

Expanded:

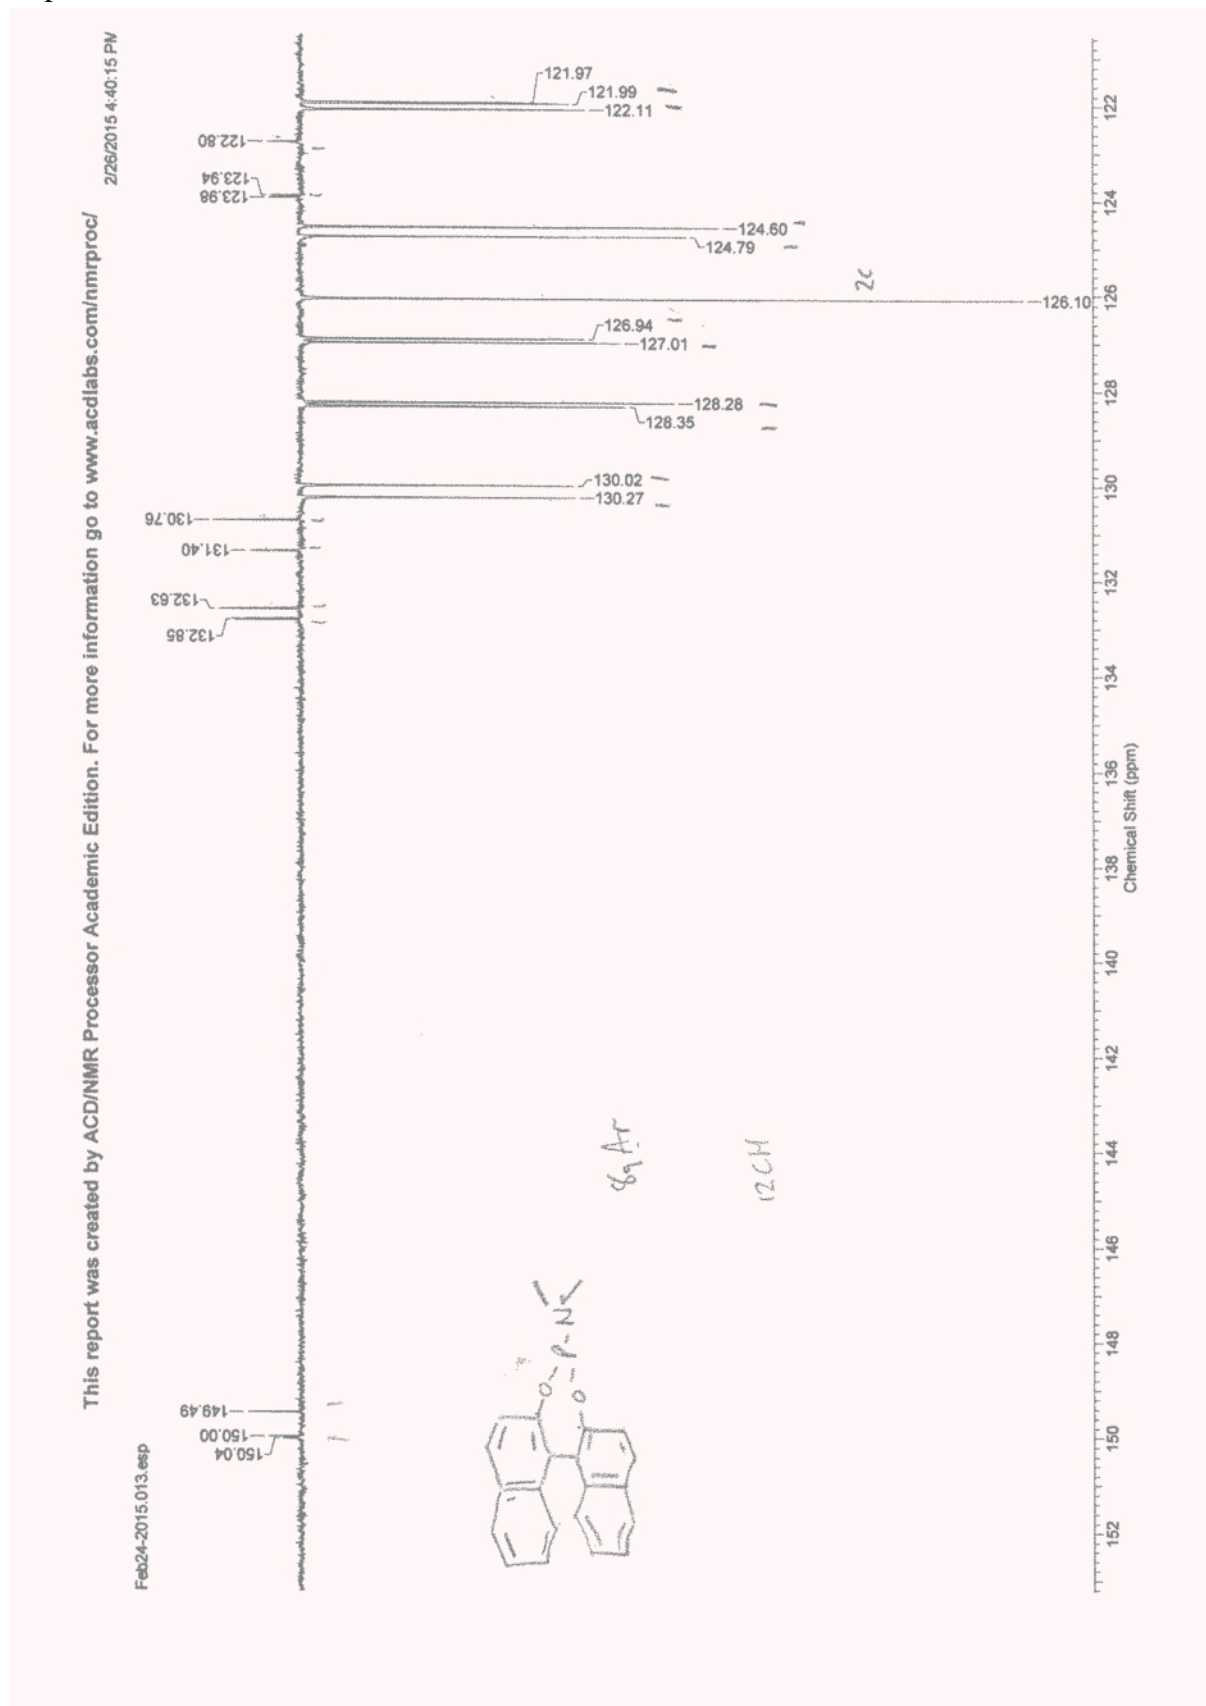

P-NMR

$\delta_p$  (202 MHz,  $\text{CDCl}_3$ )

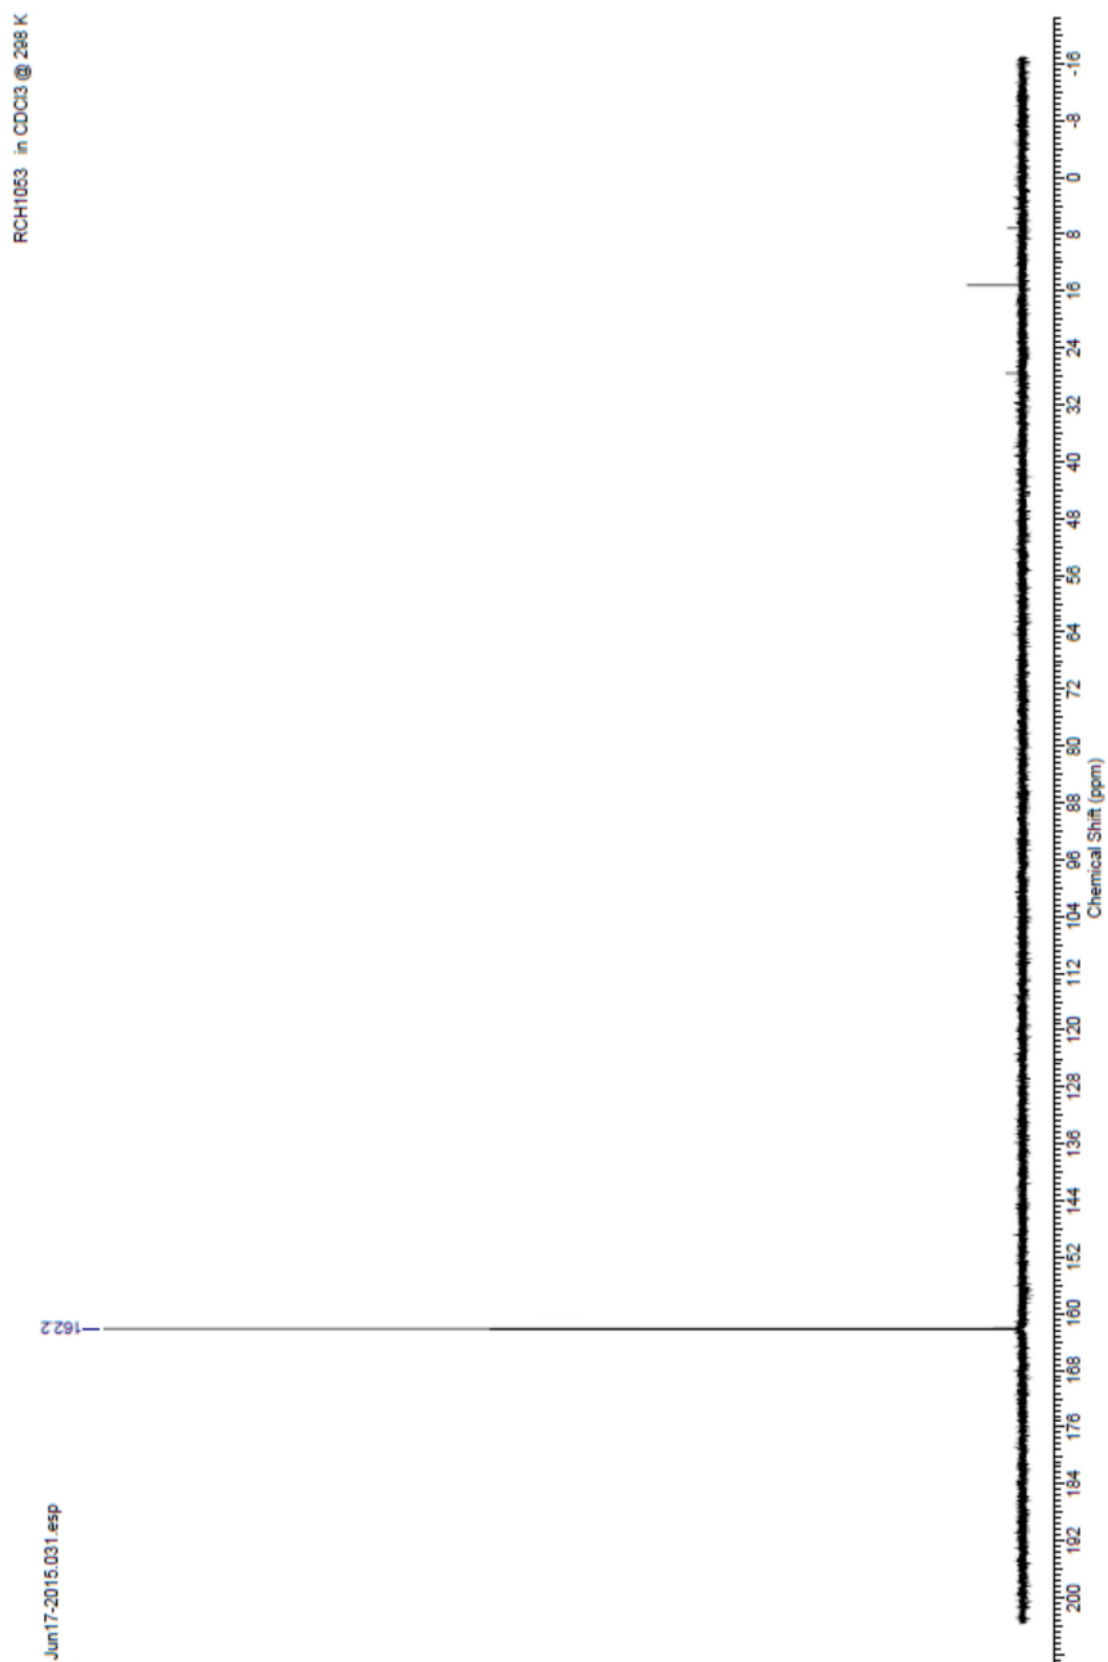

(*R*)-*N,N*-Dimethyldinaphtho[2,1-*d*:1',2'-*f*][1,3,2]dioxaphosphepin-4-amine  
MONOPHOS).

((*R*)-

$\delta_H$  (500 MHz,  $CDCl_3$ )

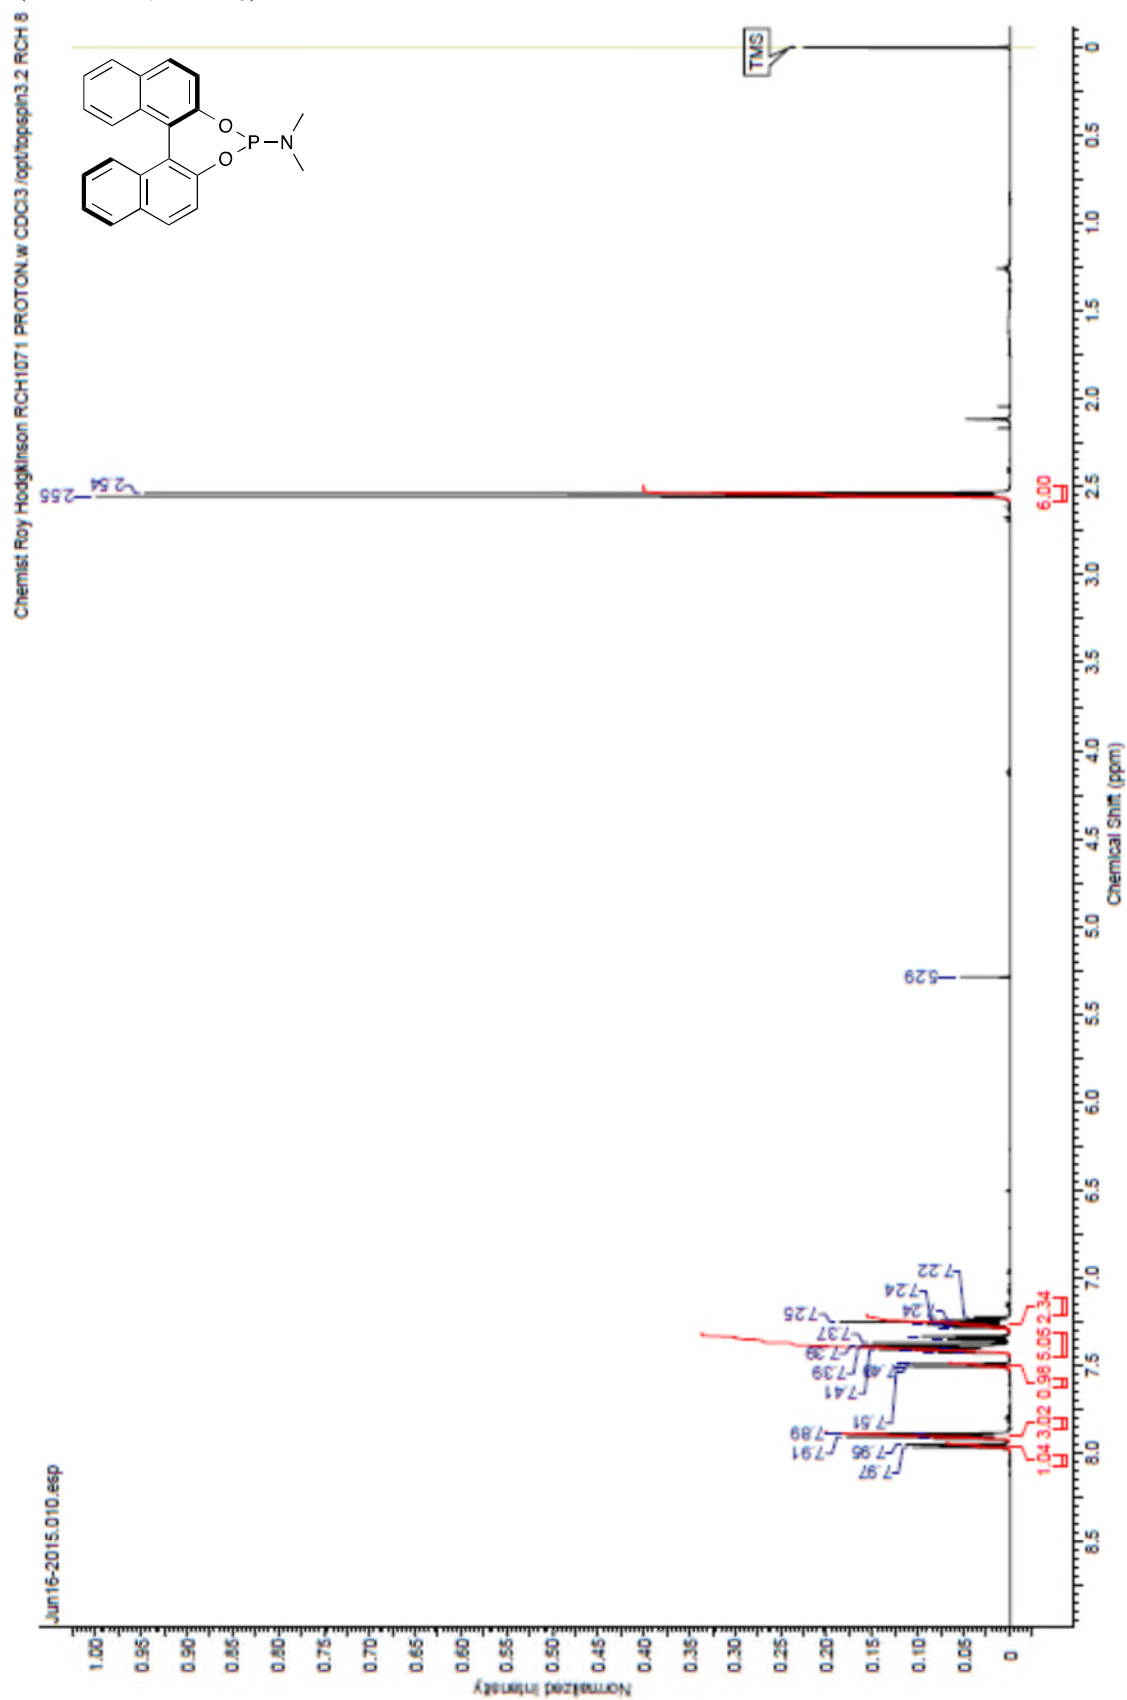

$\delta_c$  (125 MHz,  $\text{CDCl}_3$ )

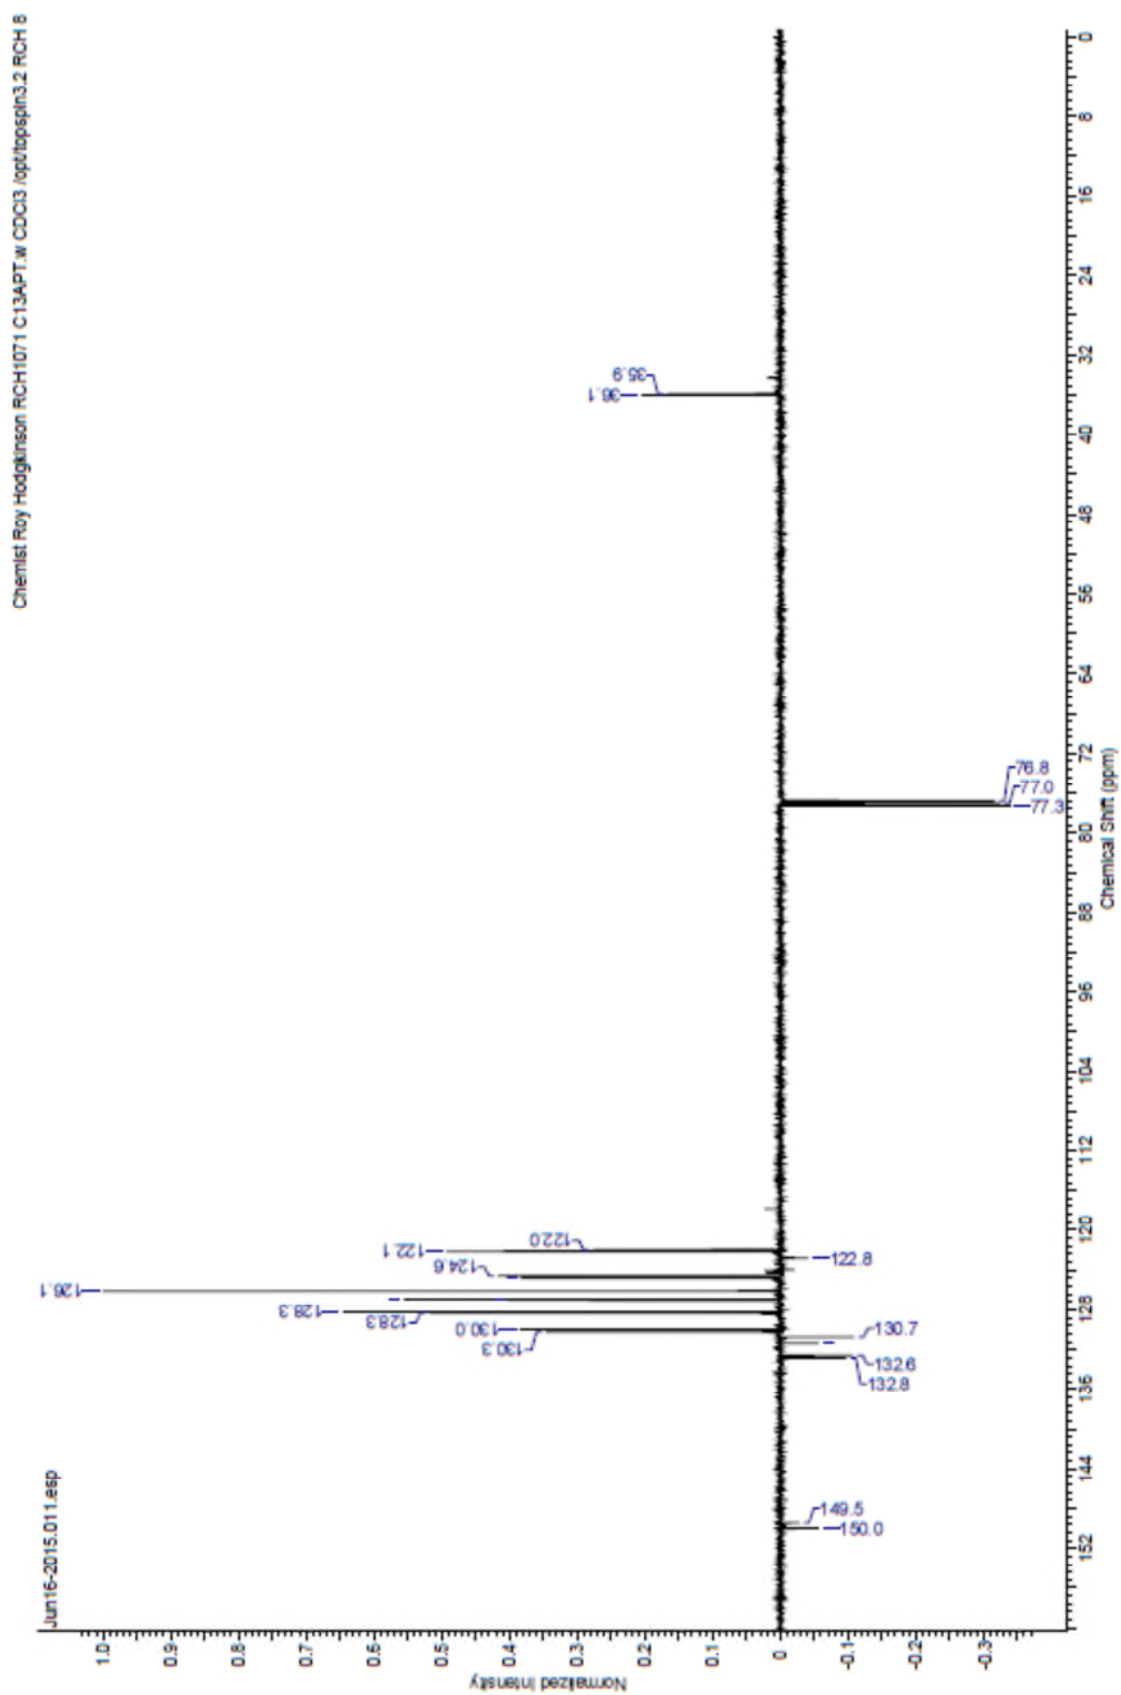

P-NMR

$\delta_p$  (202 MHz,  $\text{CDCl}_3$ )

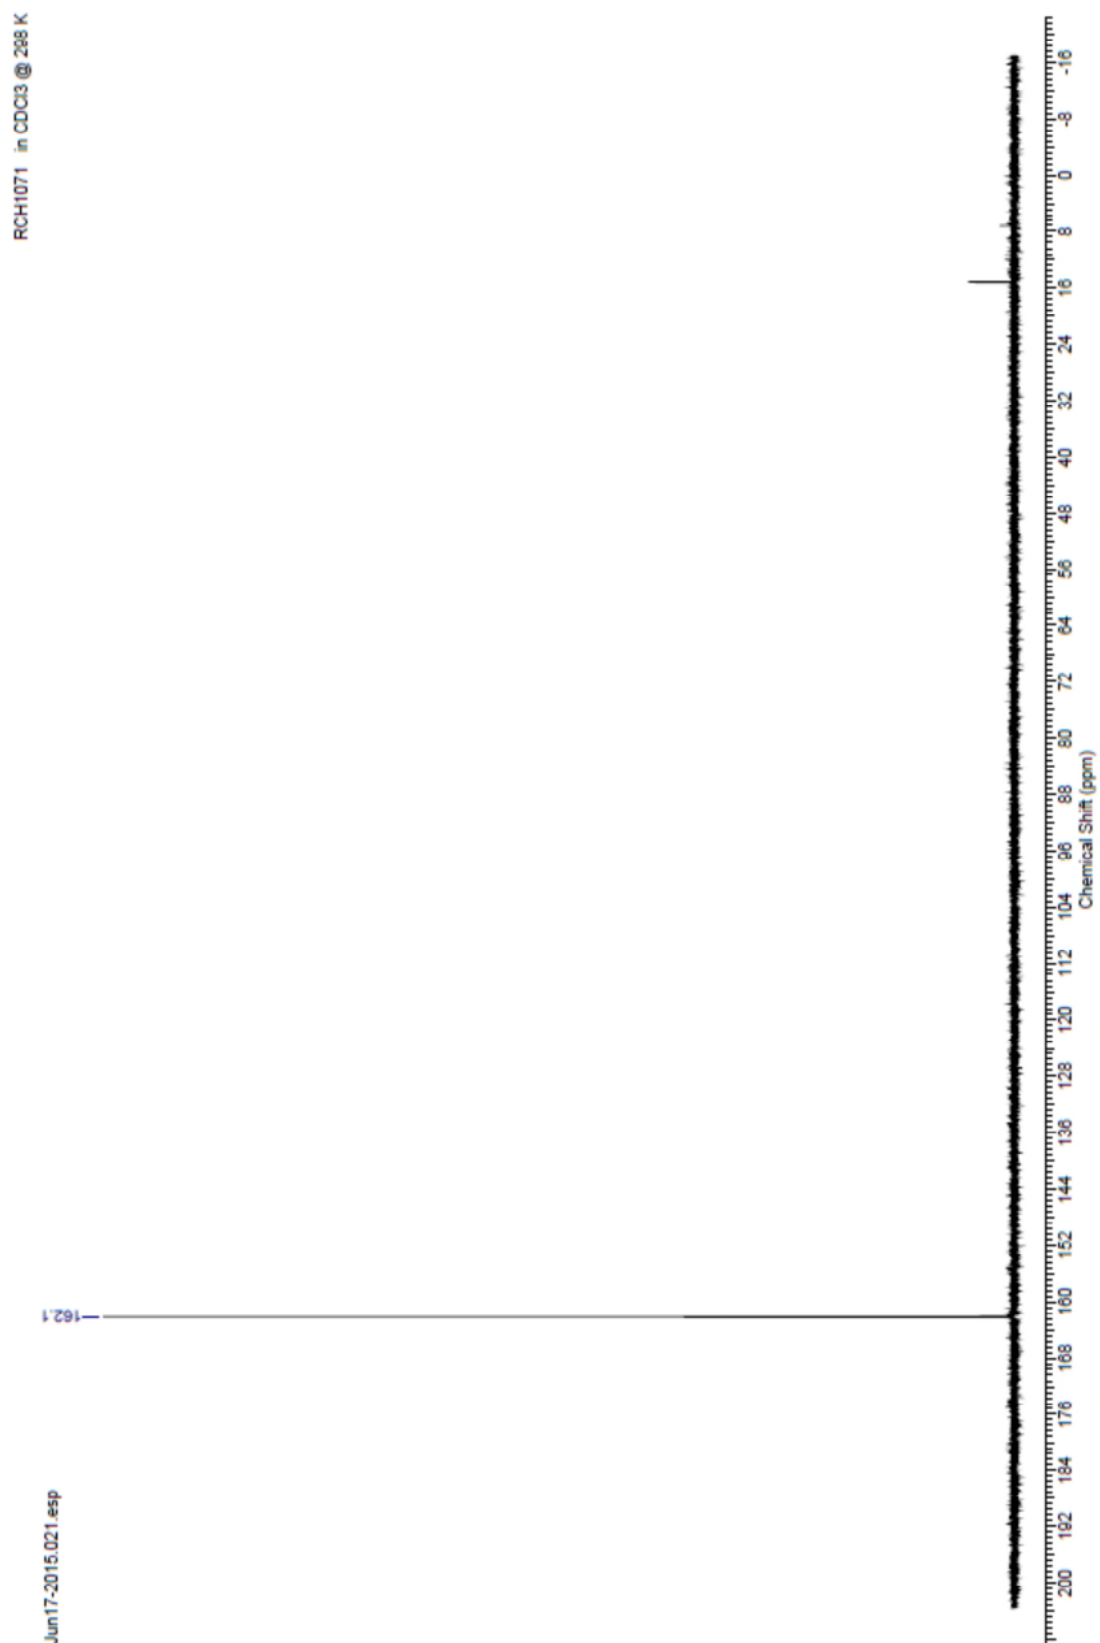



$\delta_{\text{H}}$  (500 MHz, CDCl<sub>3</sub>)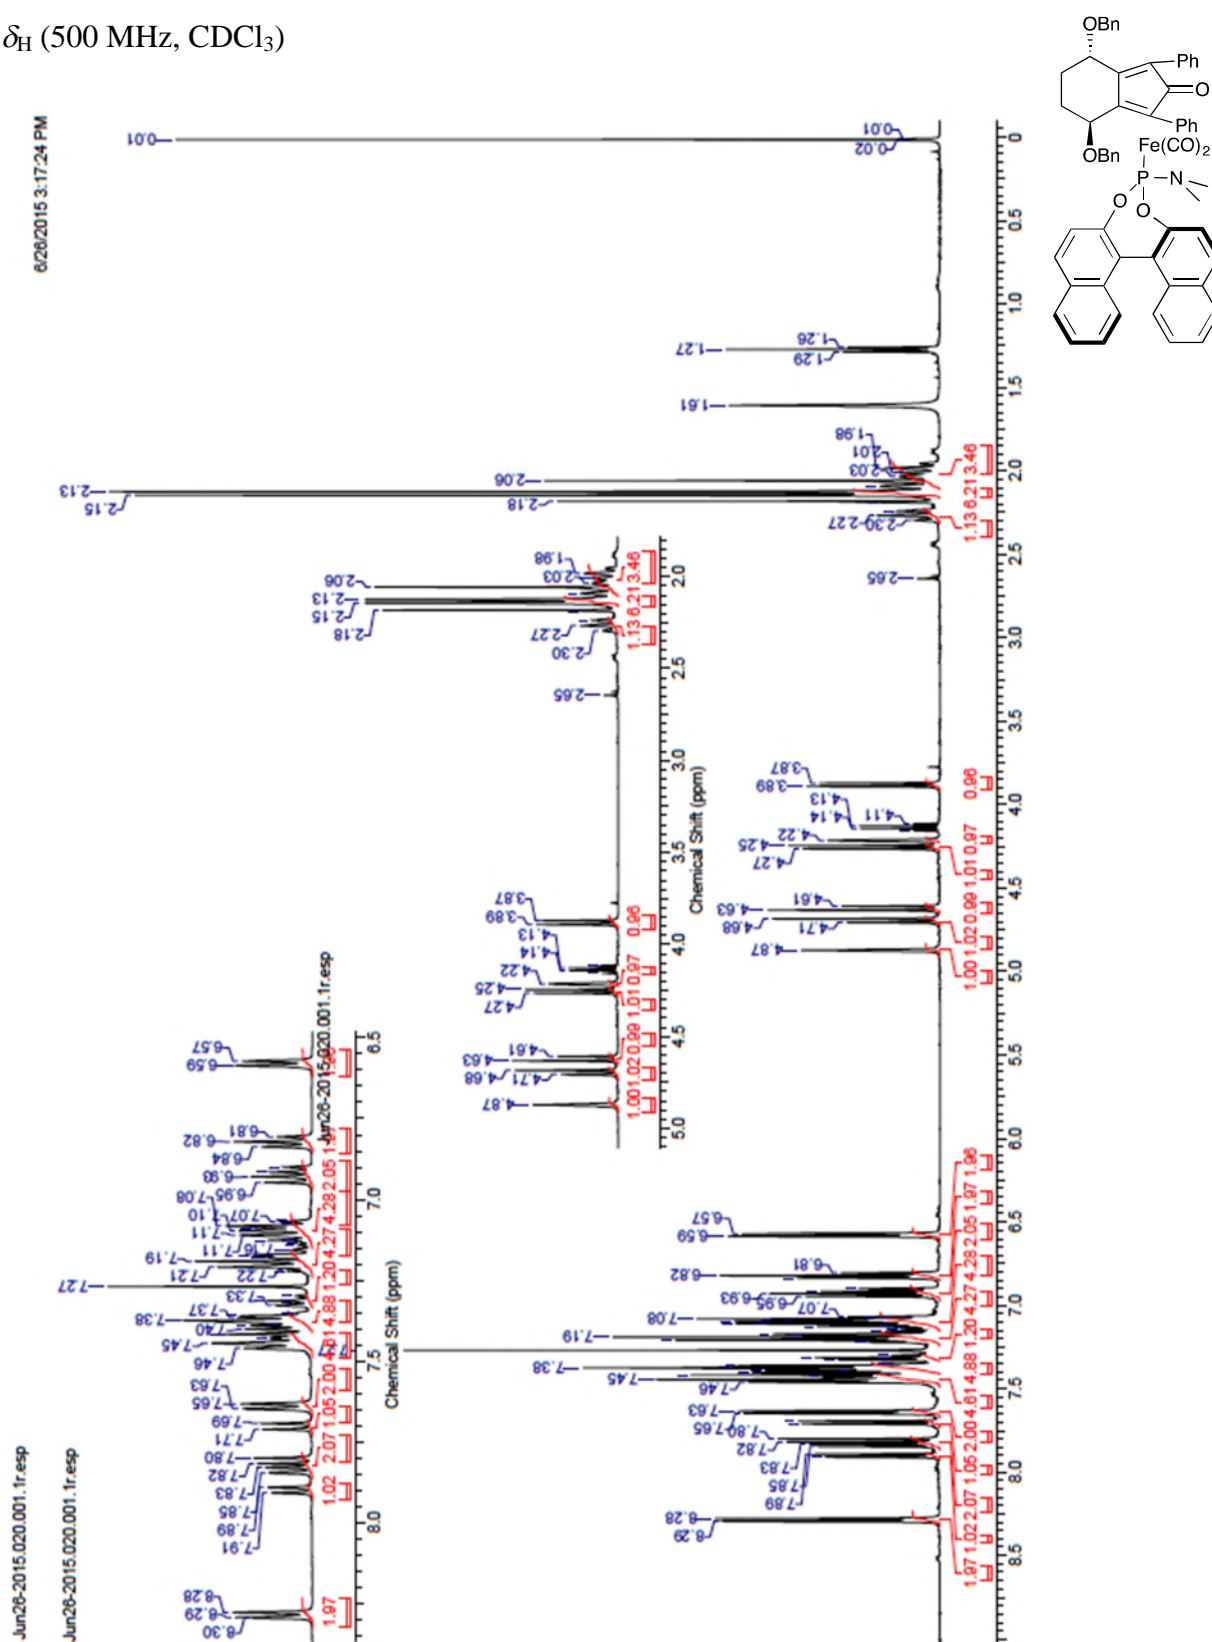

$\delta_{\text{C}}$  (125 MHz,  $\text{CDCl}_3$ )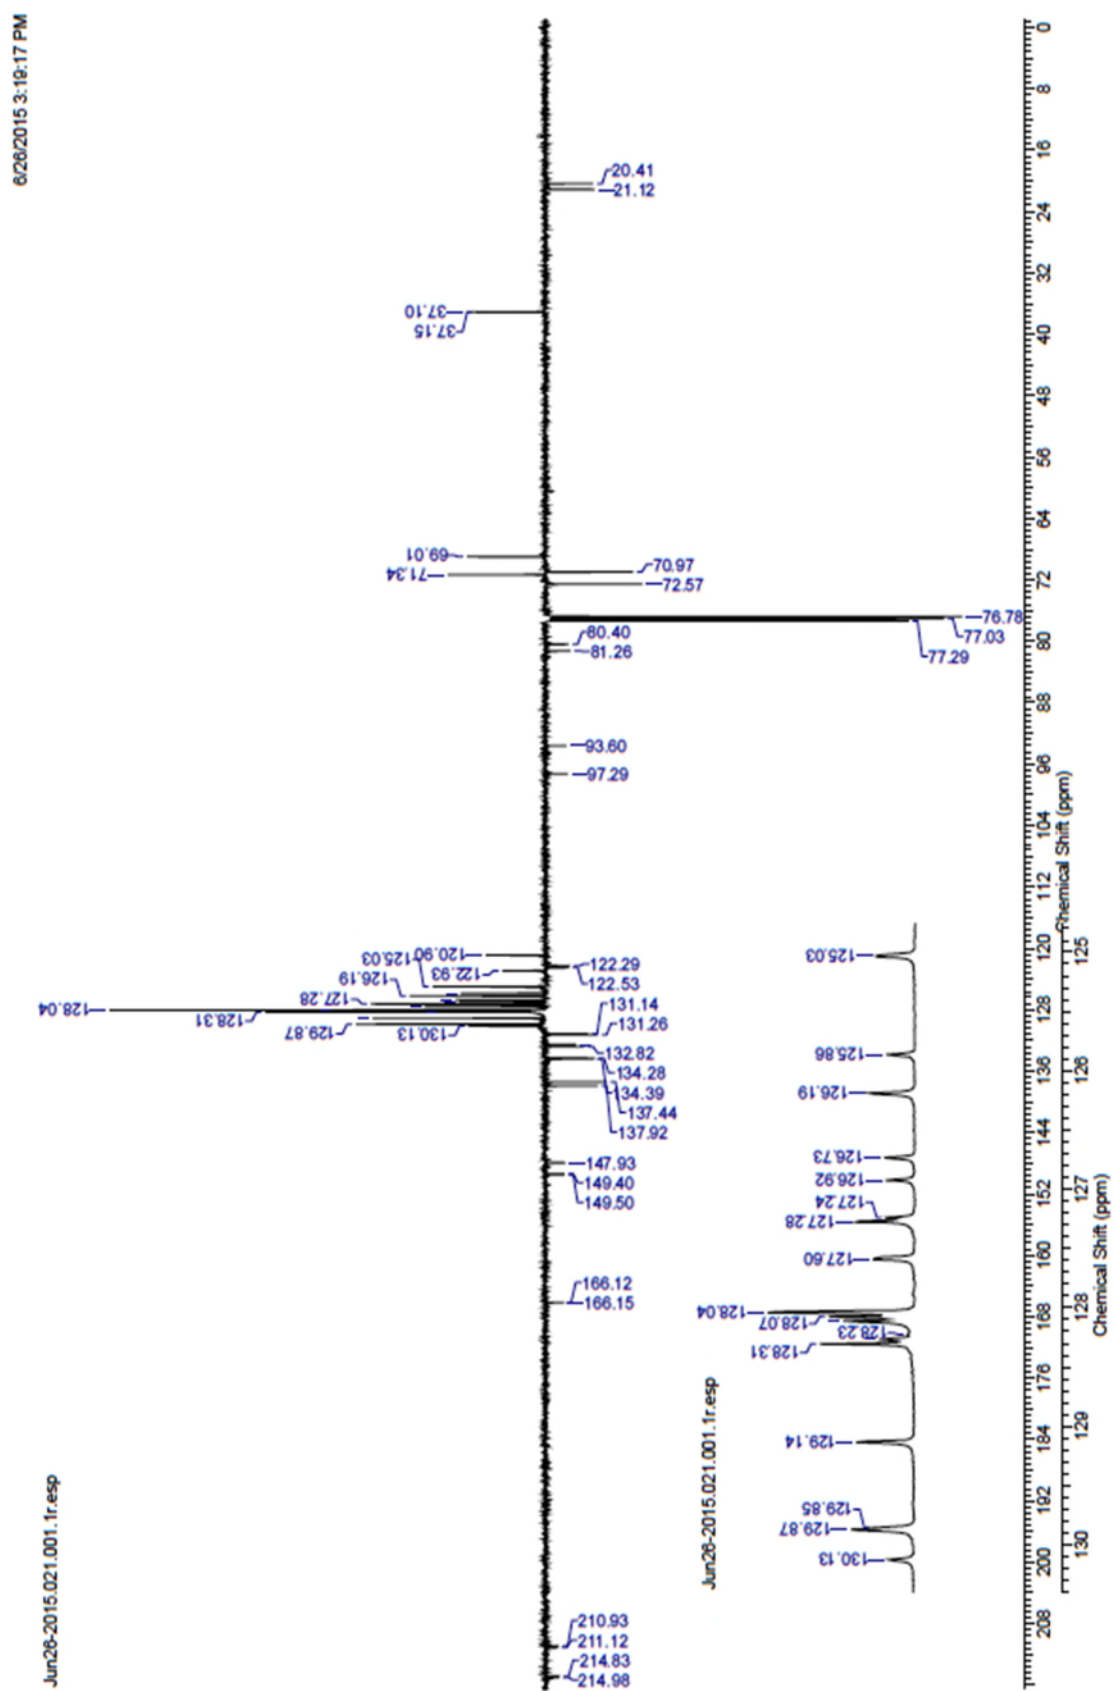

P-NMR

$\delta_P$  (242 MHz,  $\text{CDCl}_3$ )

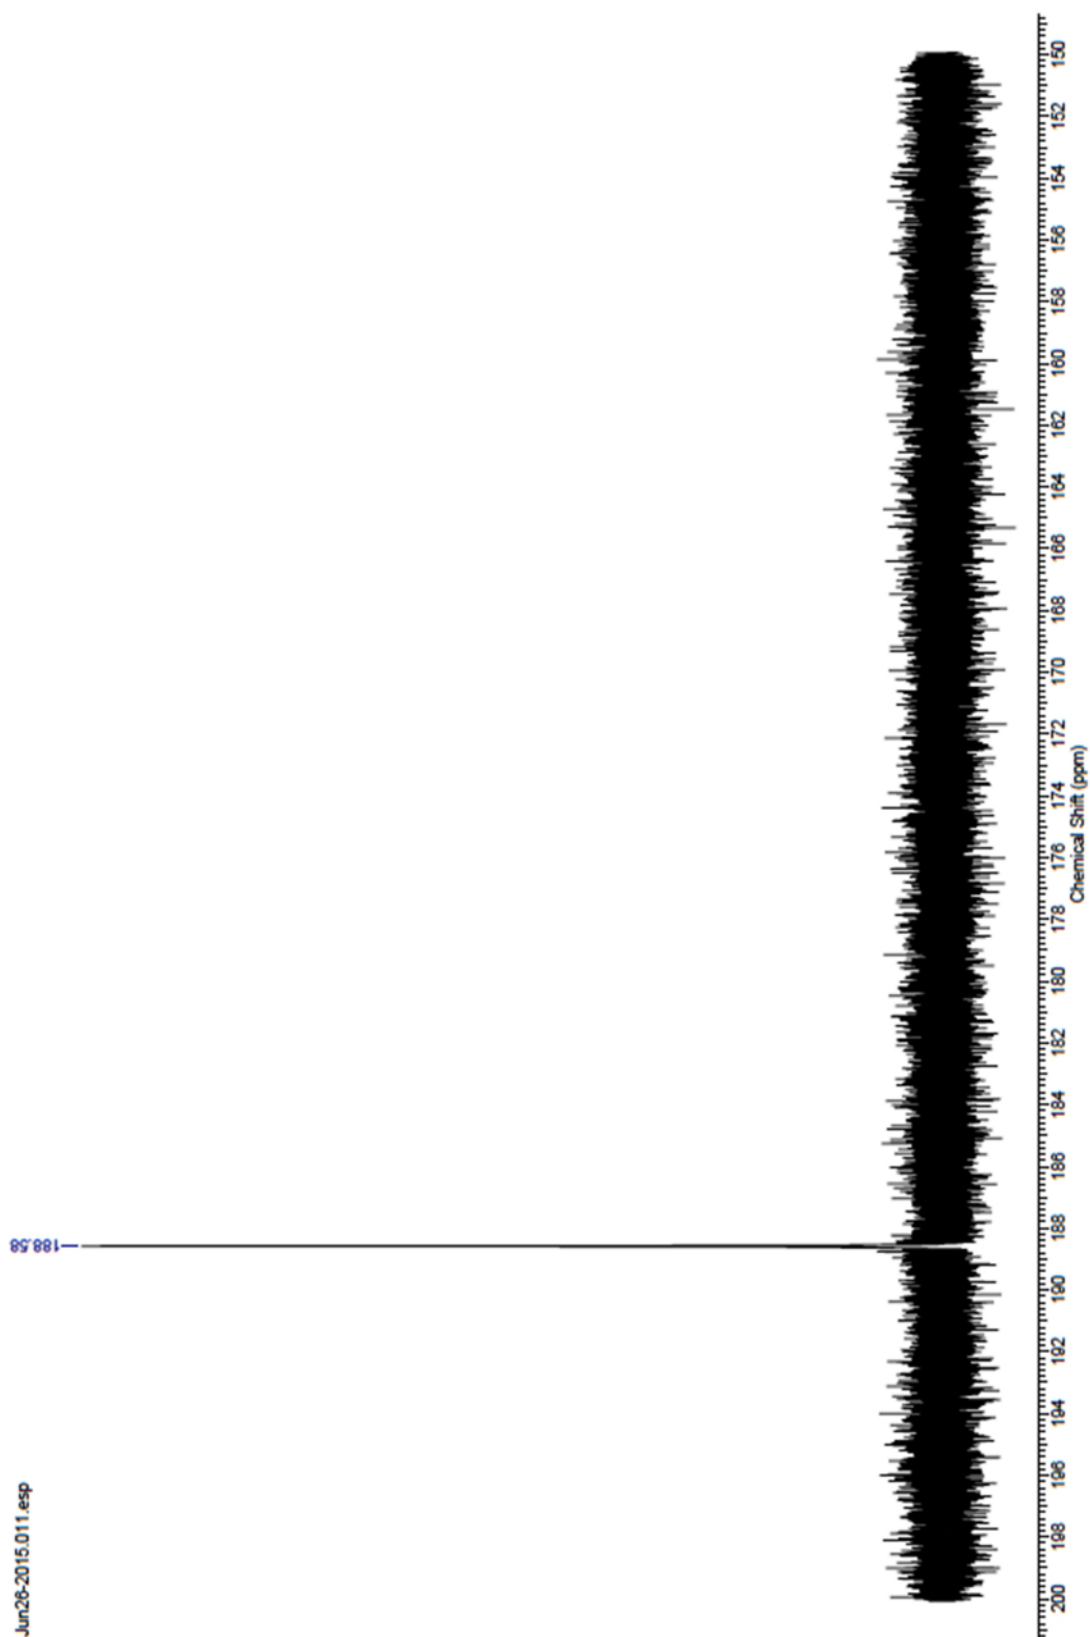

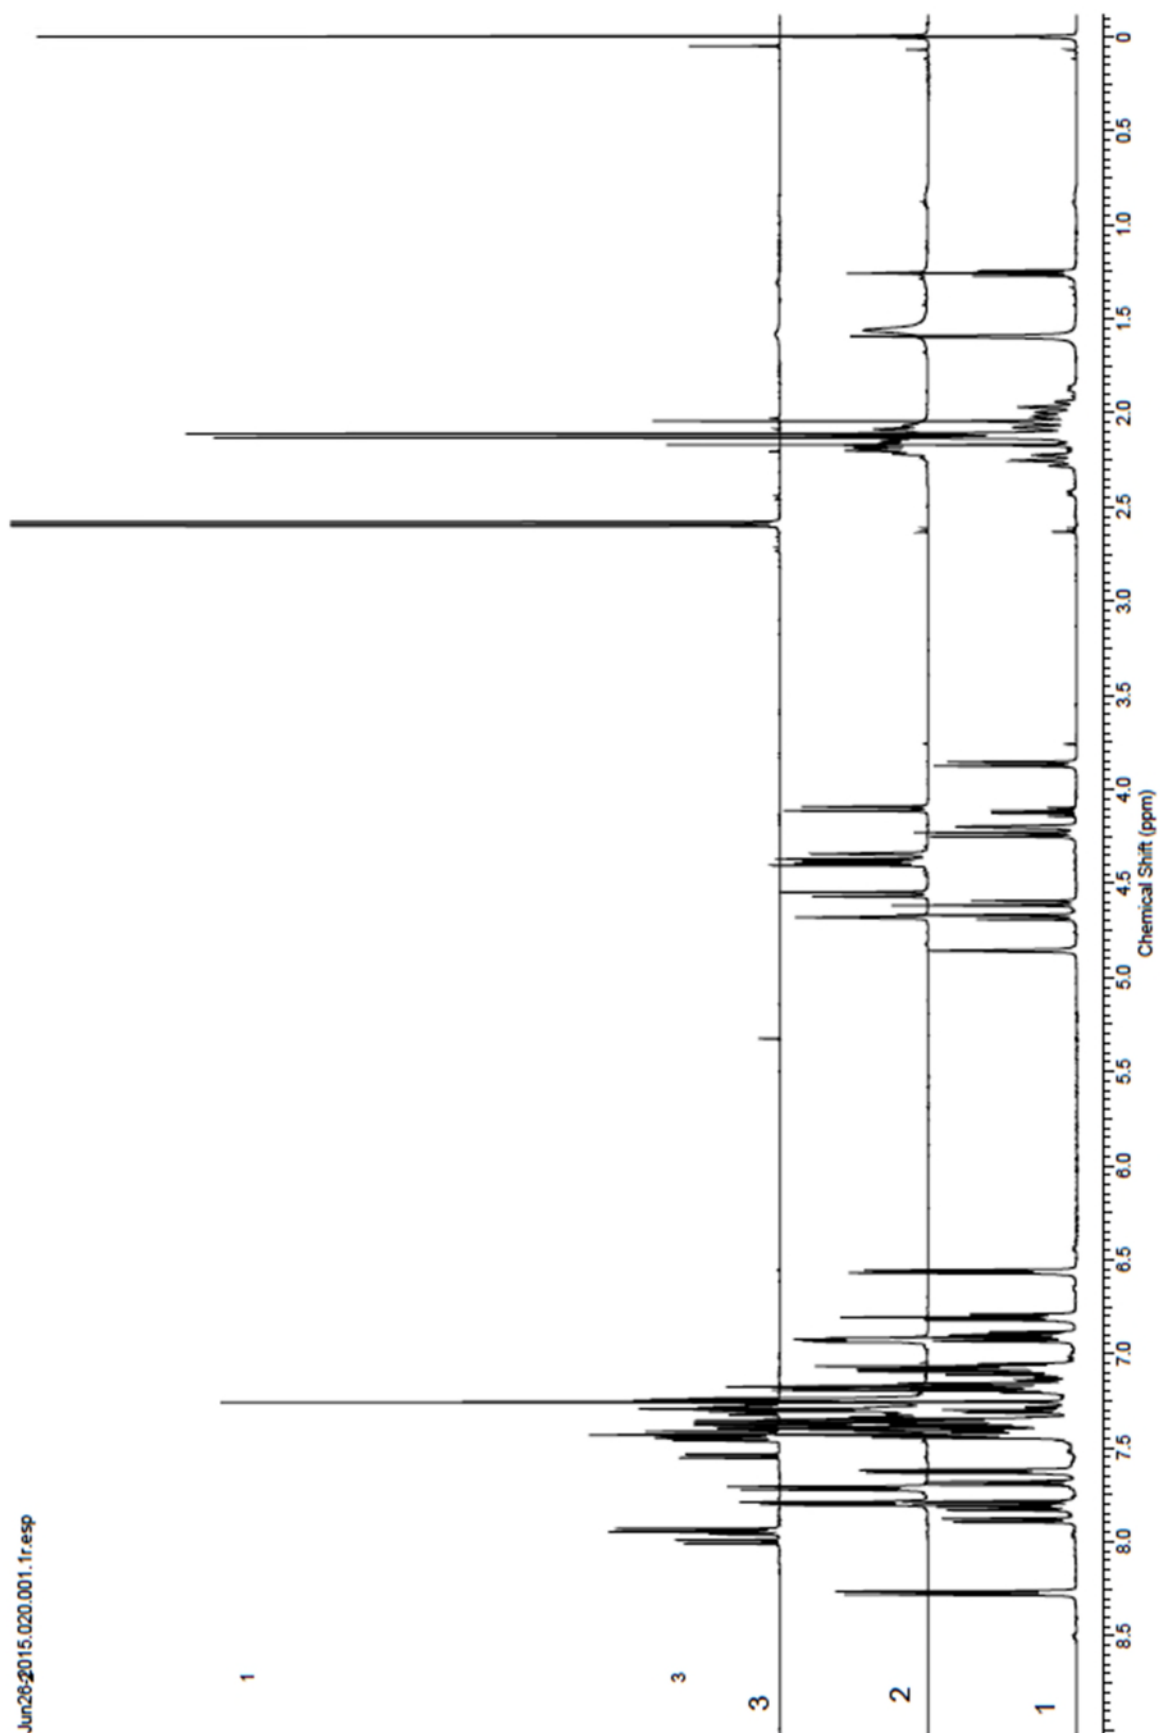

1) OBn catalyst with S-Monophos; 2) OBn Catalyst; 3) S-Monophos.

$\delta_{\text{H}}$  (500 MHz,  $\text{CDCl}_3$ )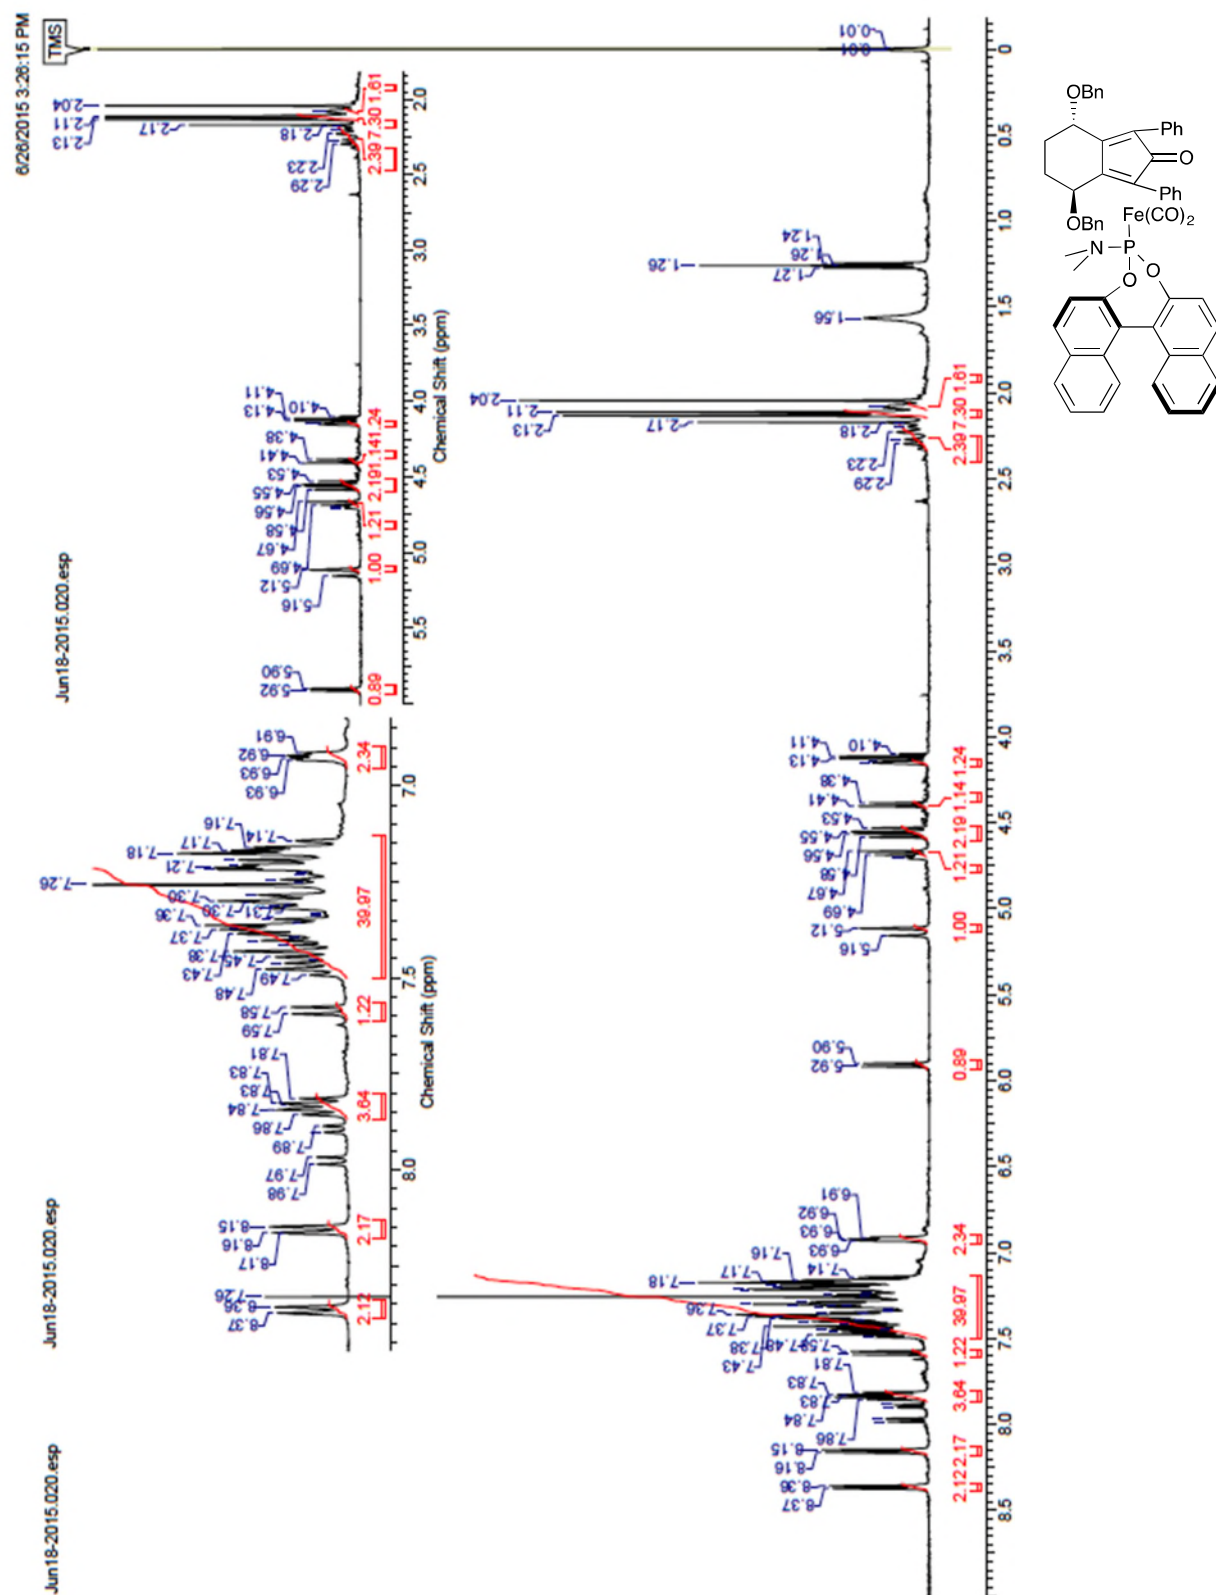

$\delta_C$  (125 MHz,  $CDCl_3$ )

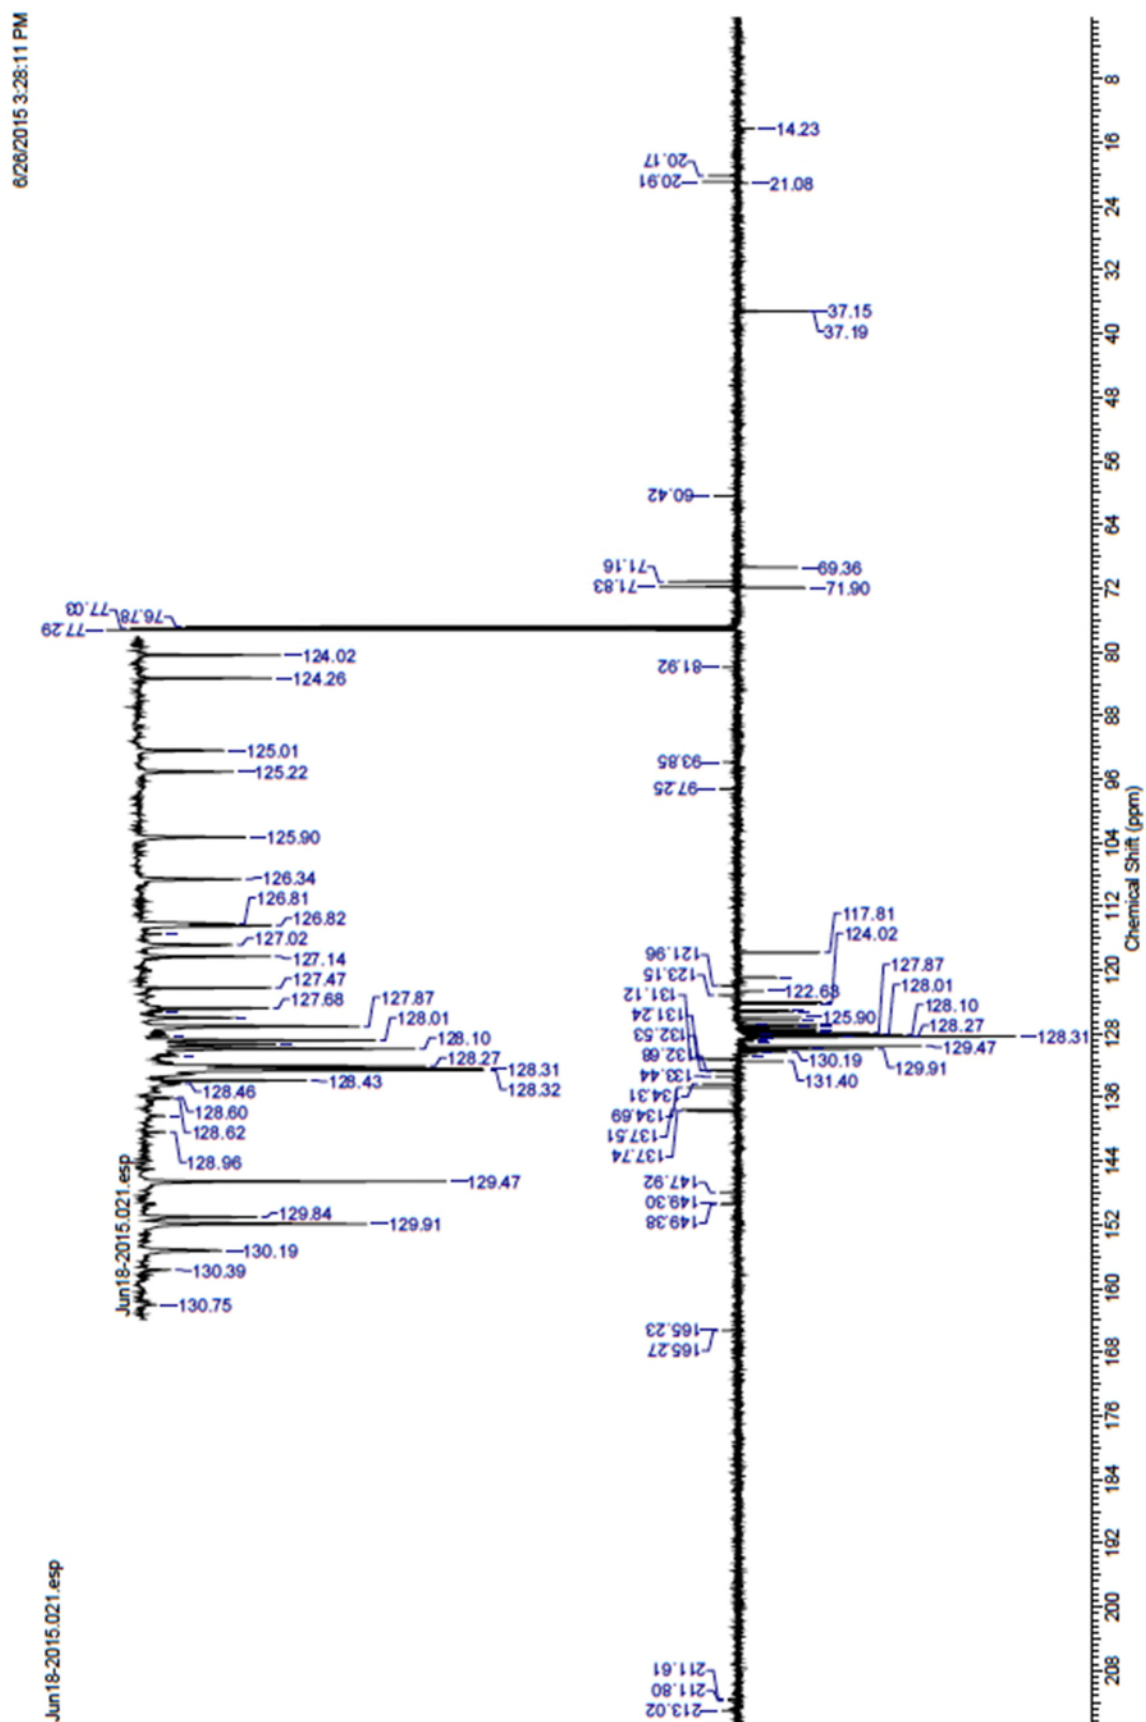

P-NMR

$\delta_P$  (242 MHz,  $\text{CDCl}_3$ )

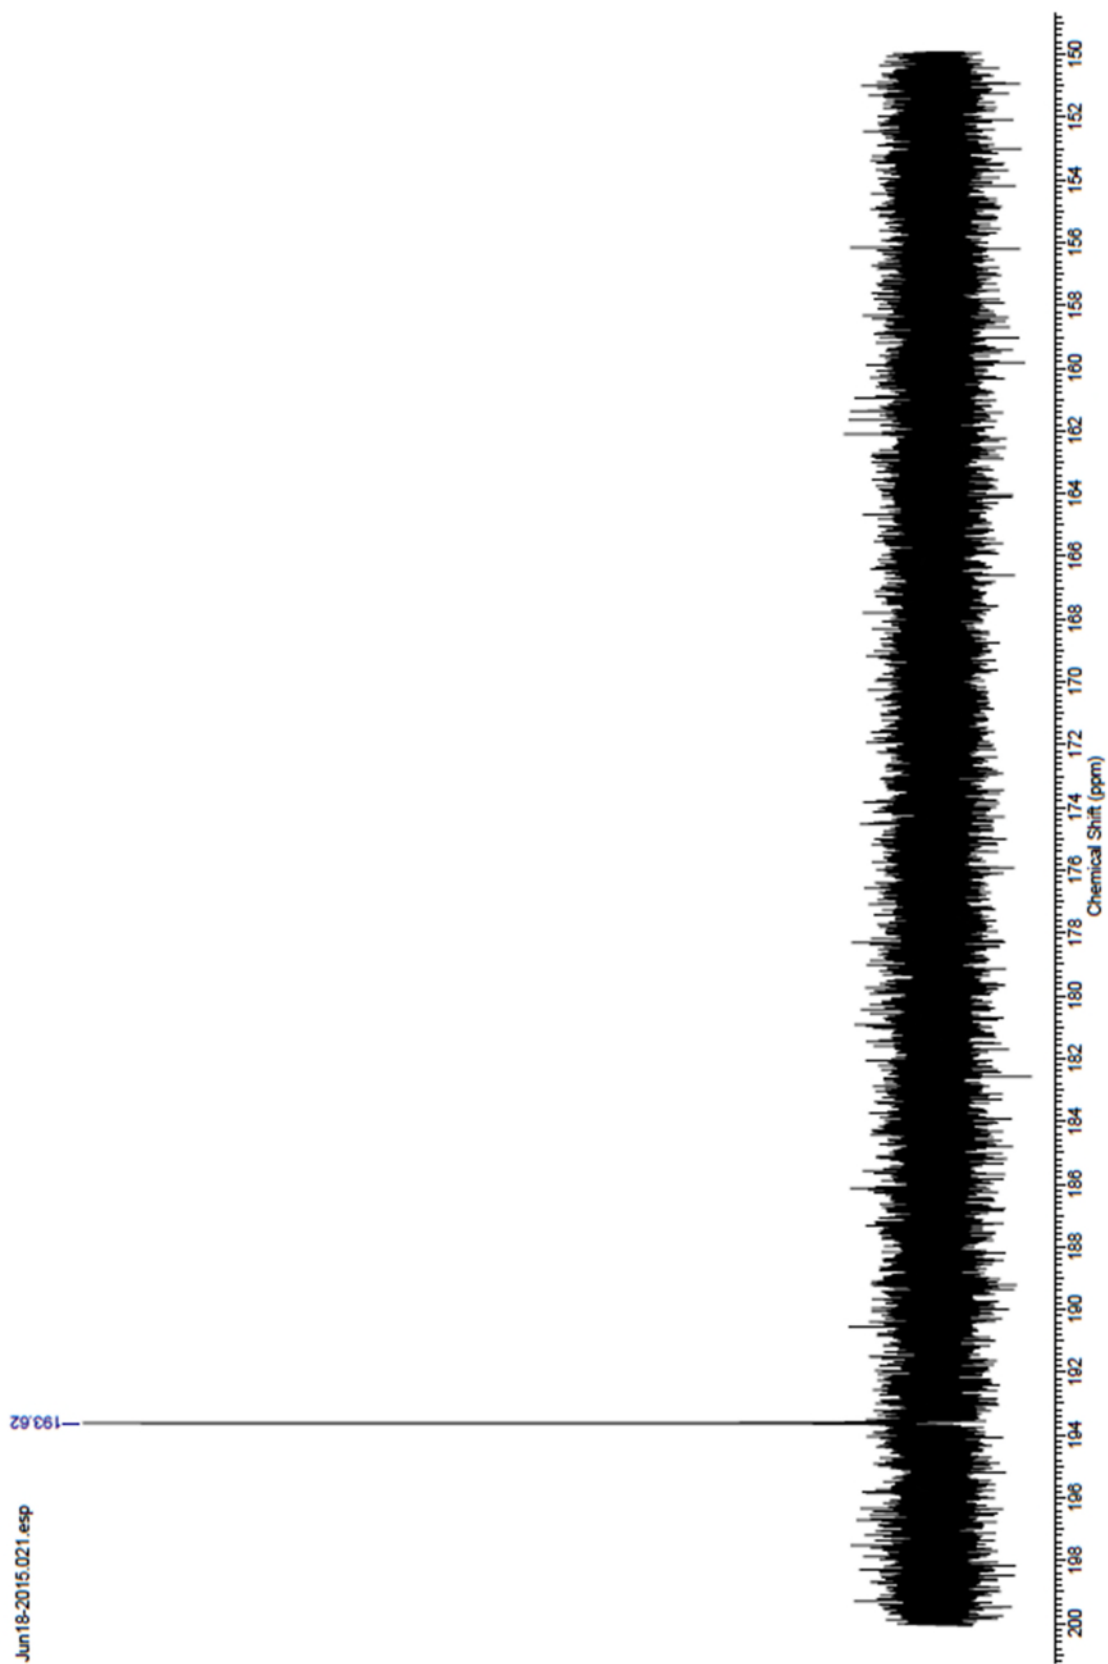

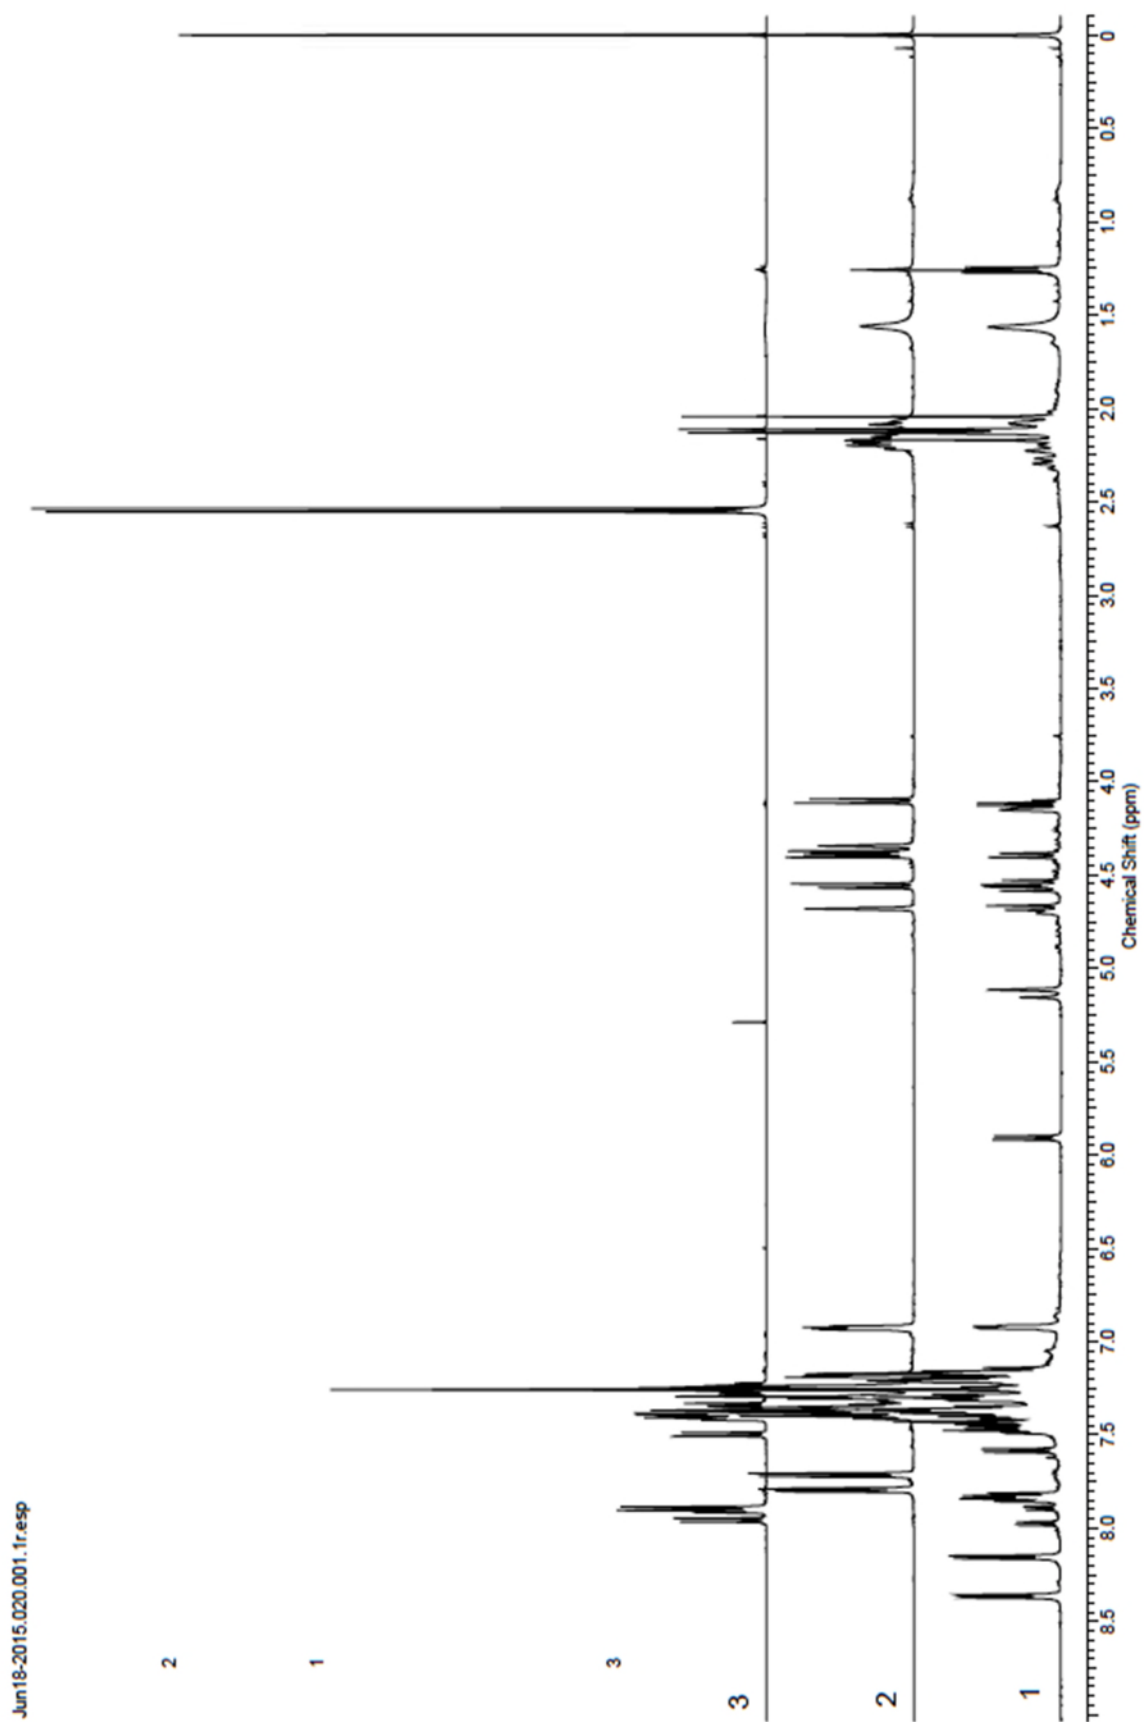

1) OBn catalyst with R-Monophos; 2) OBn Catalyst; 3) R-Monophos.



Jun18-2015.020.001.1r.esp

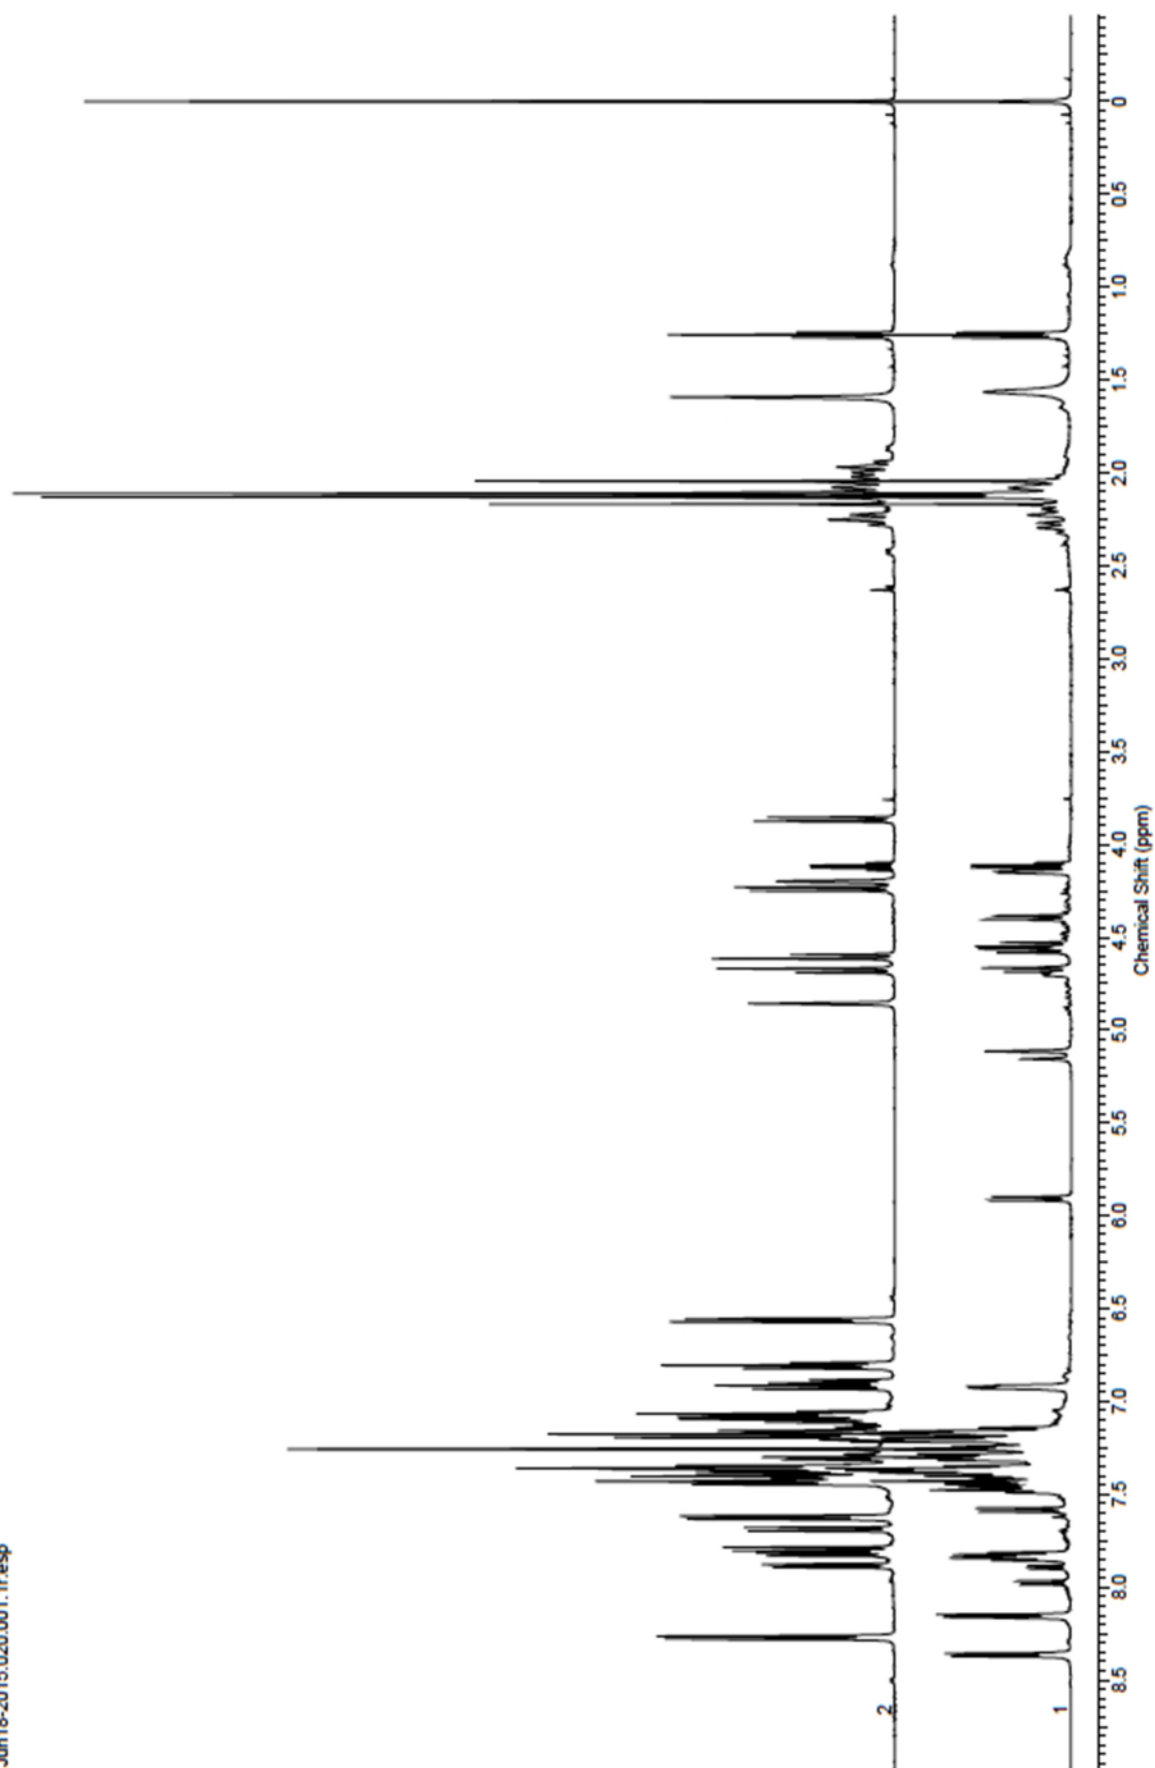

1) OBn Catalyst with R-Monophos; 2) OBn Catalyst with S-Monophos.

Dicarbonyl-((4*S*,7*S*)-4,7-bis((*tert*-butyldimethylsilyl)oxy)-1,3-diphenyl-4,5,6,7-tetrahydro-2*H*-inden-2-one-(*S*)-*N,N*-dimethyldinaphtho[2,1-*d*:1',2'-*f*][1,3,2]dioxaphosphepin-4-amine) iron **24**.

$\delta_H$  (500 MHz, CDCl<sub>3</sub>)

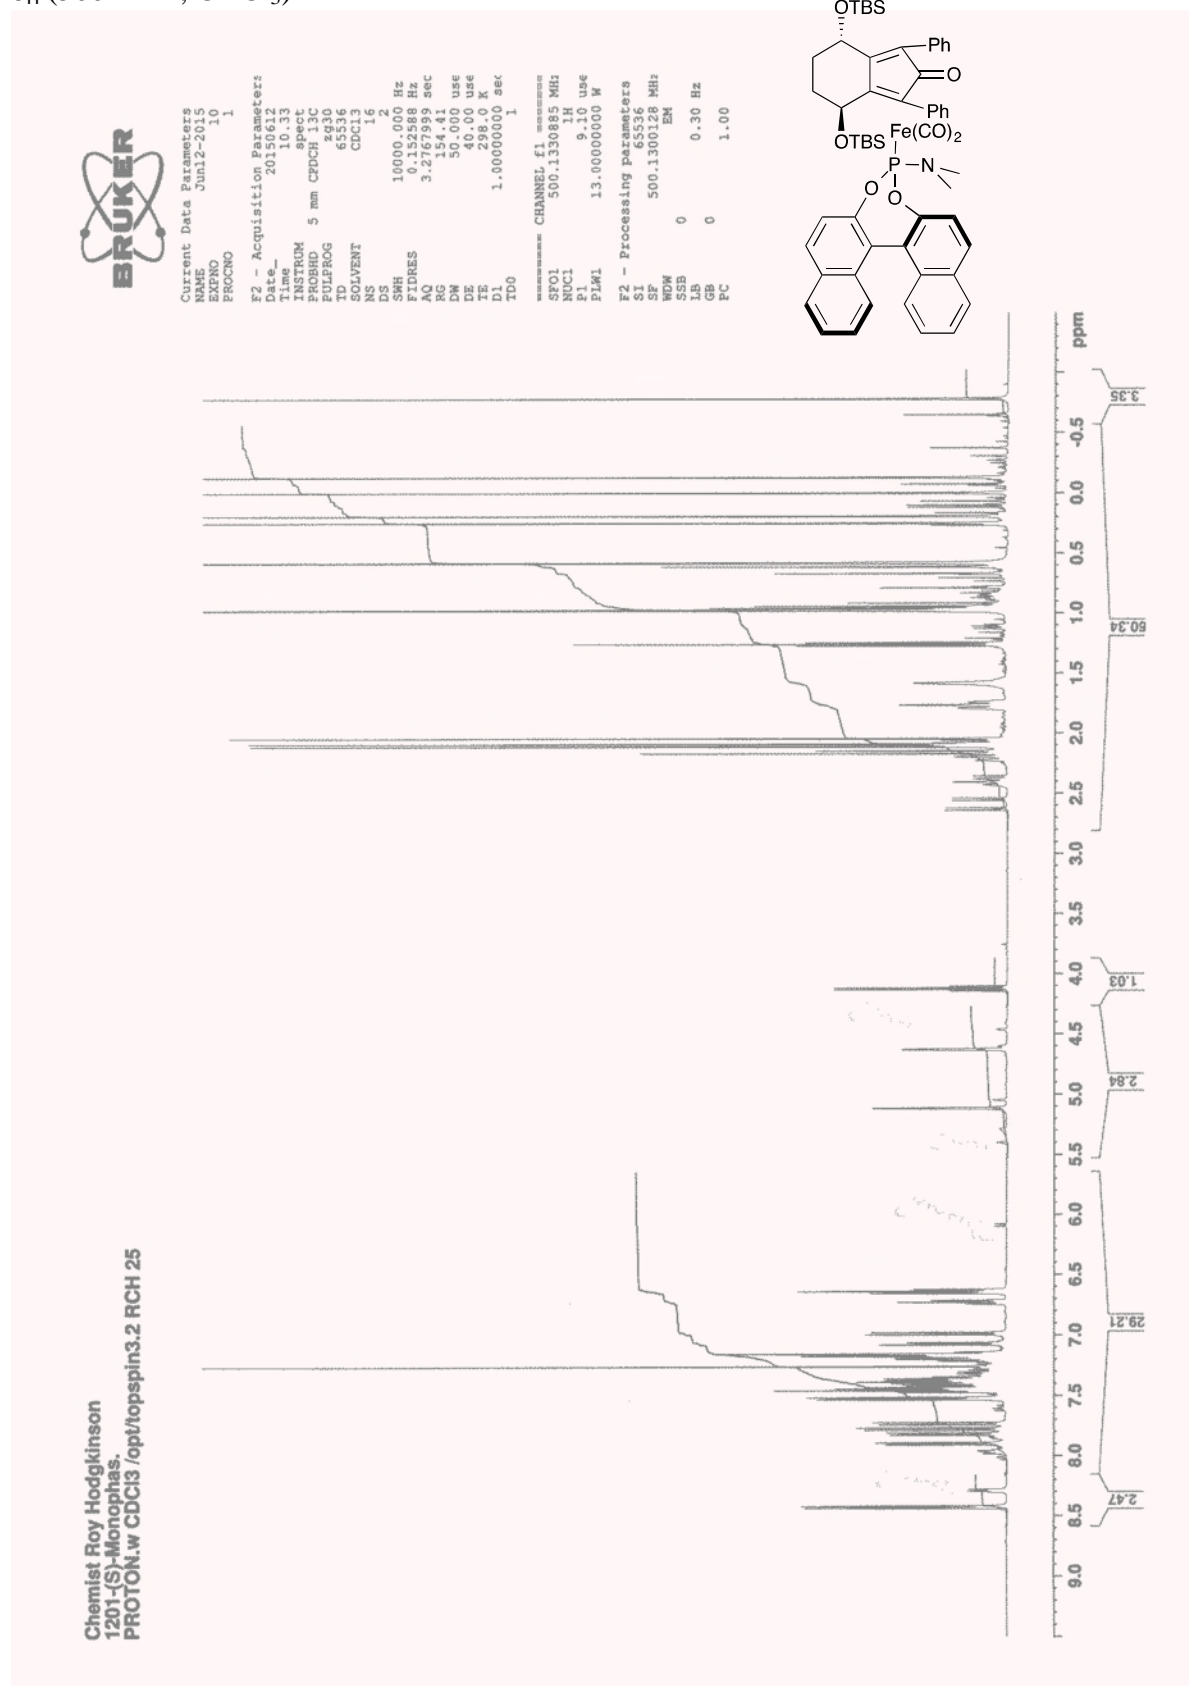

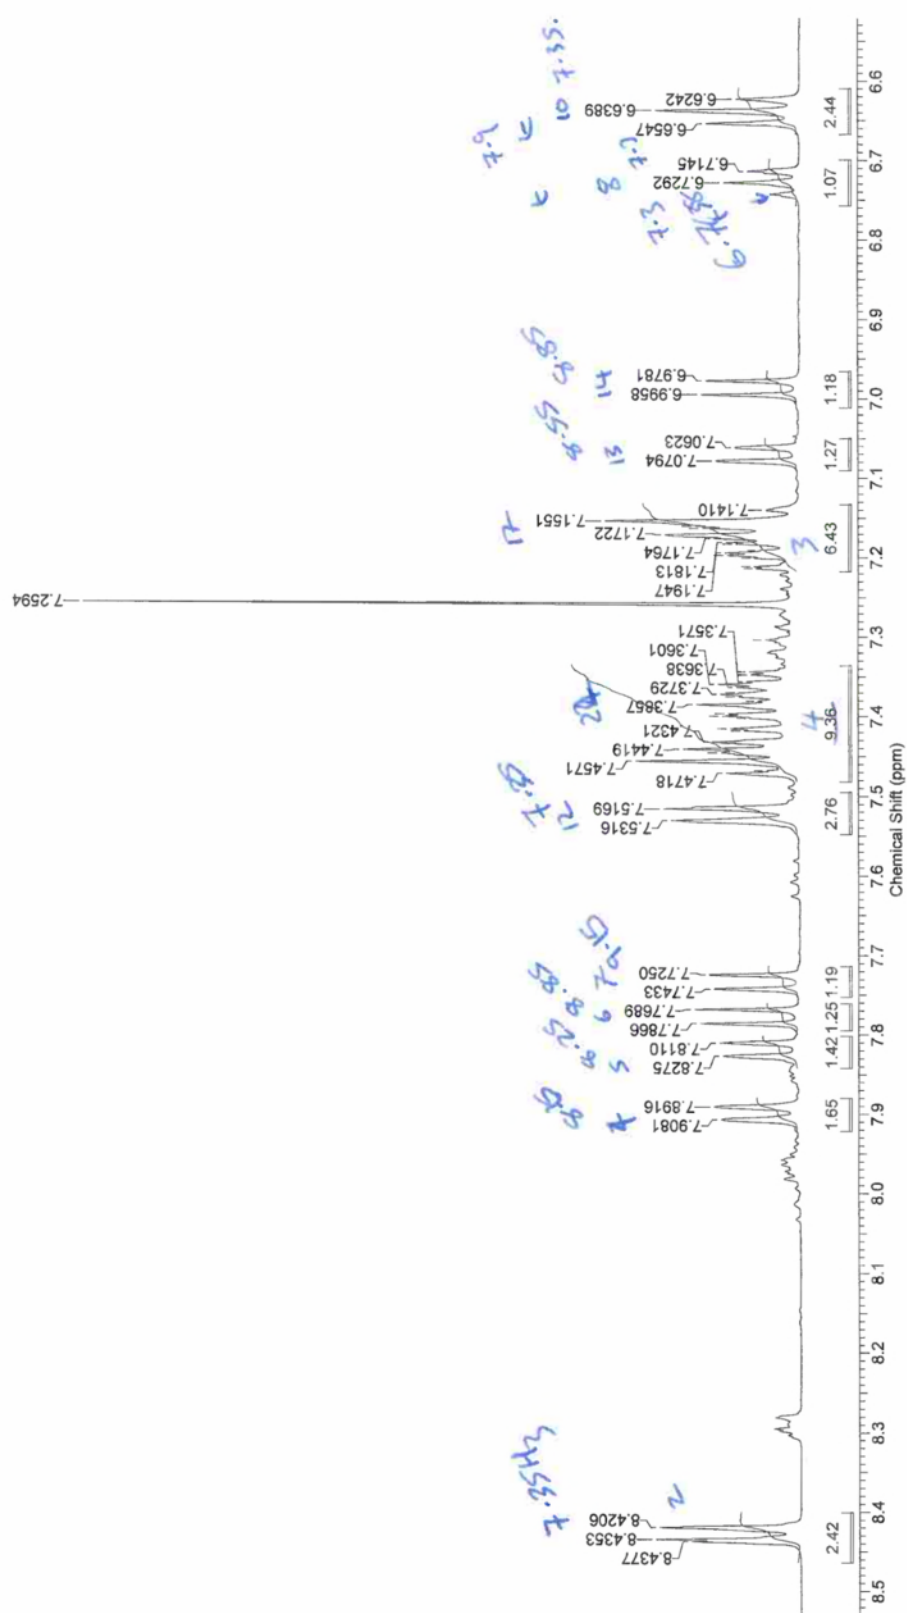

Jun12-2015.010.esp

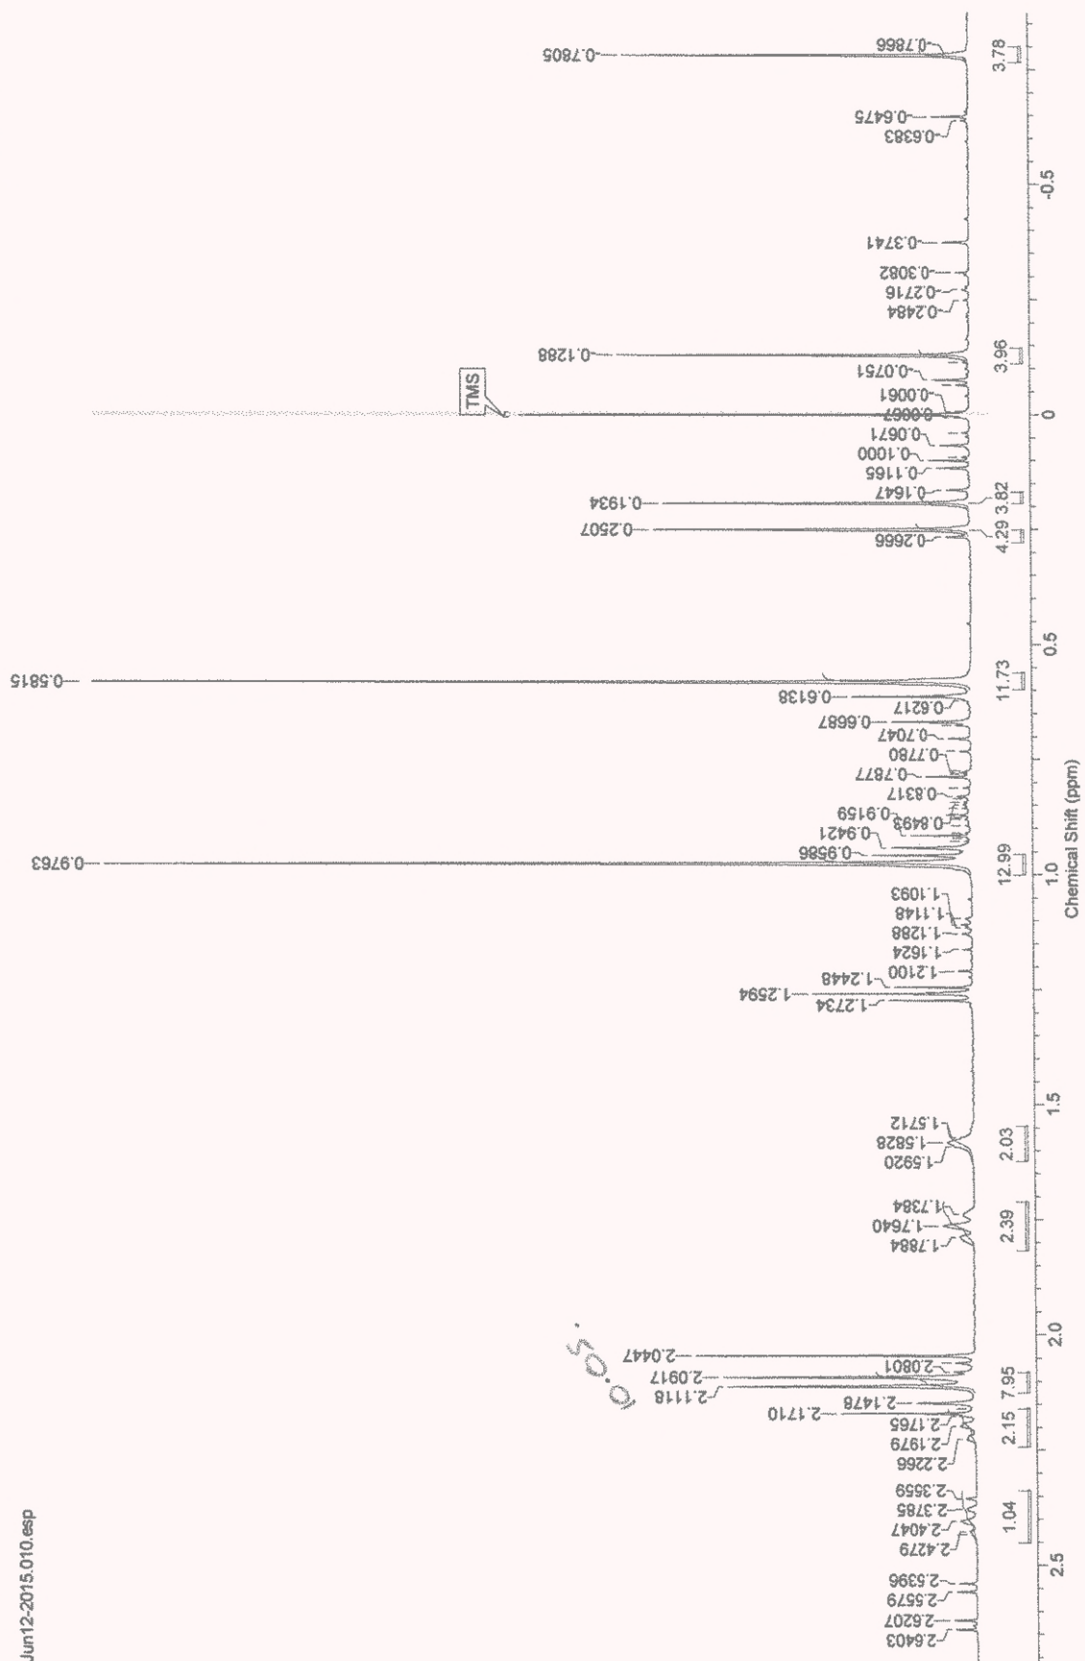

$\delta_c$  (125 MHz,  $\text{CDCl}_3$ )

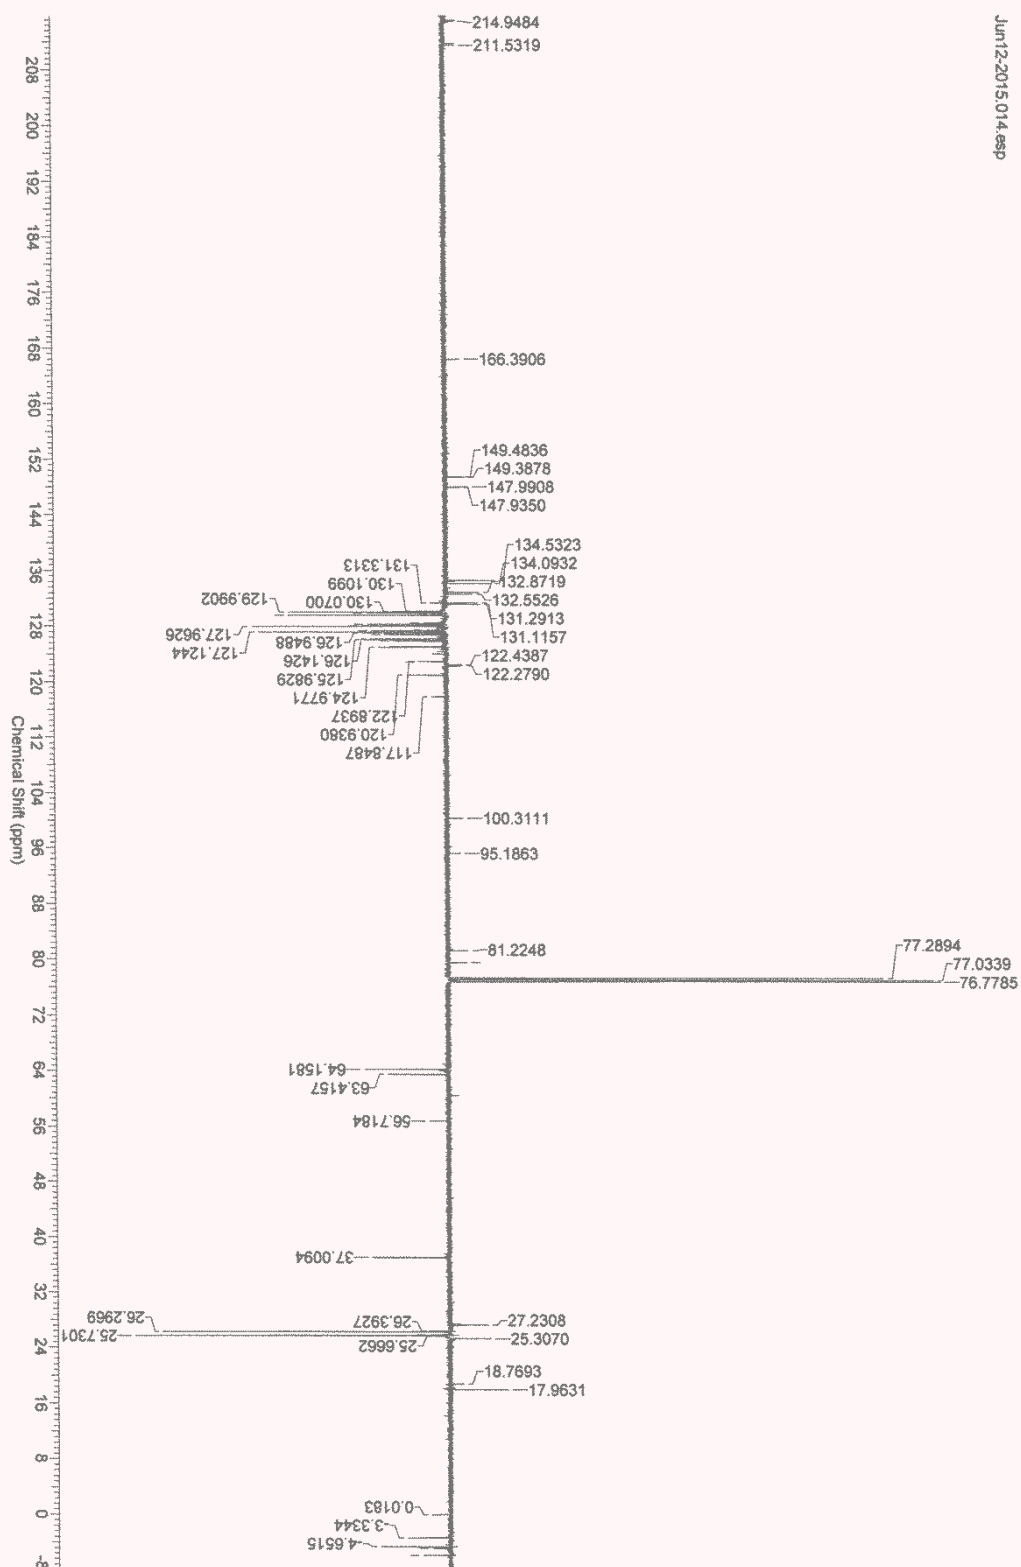

Jun12-2015.014.esp

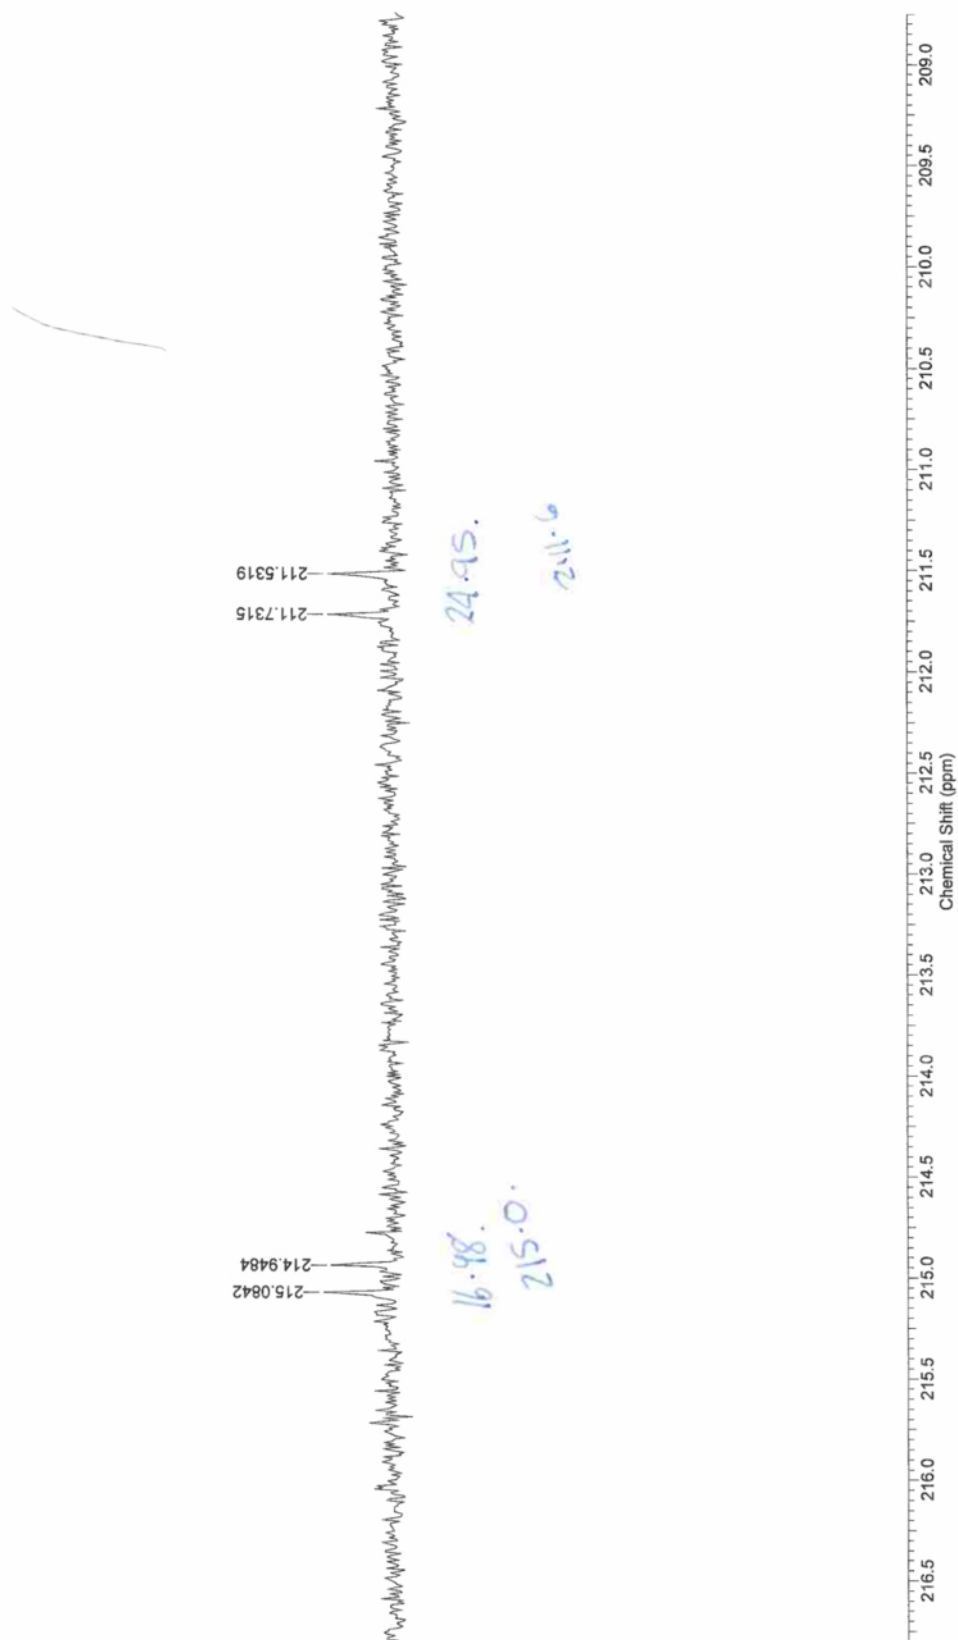

Jun12-2015.014.esp

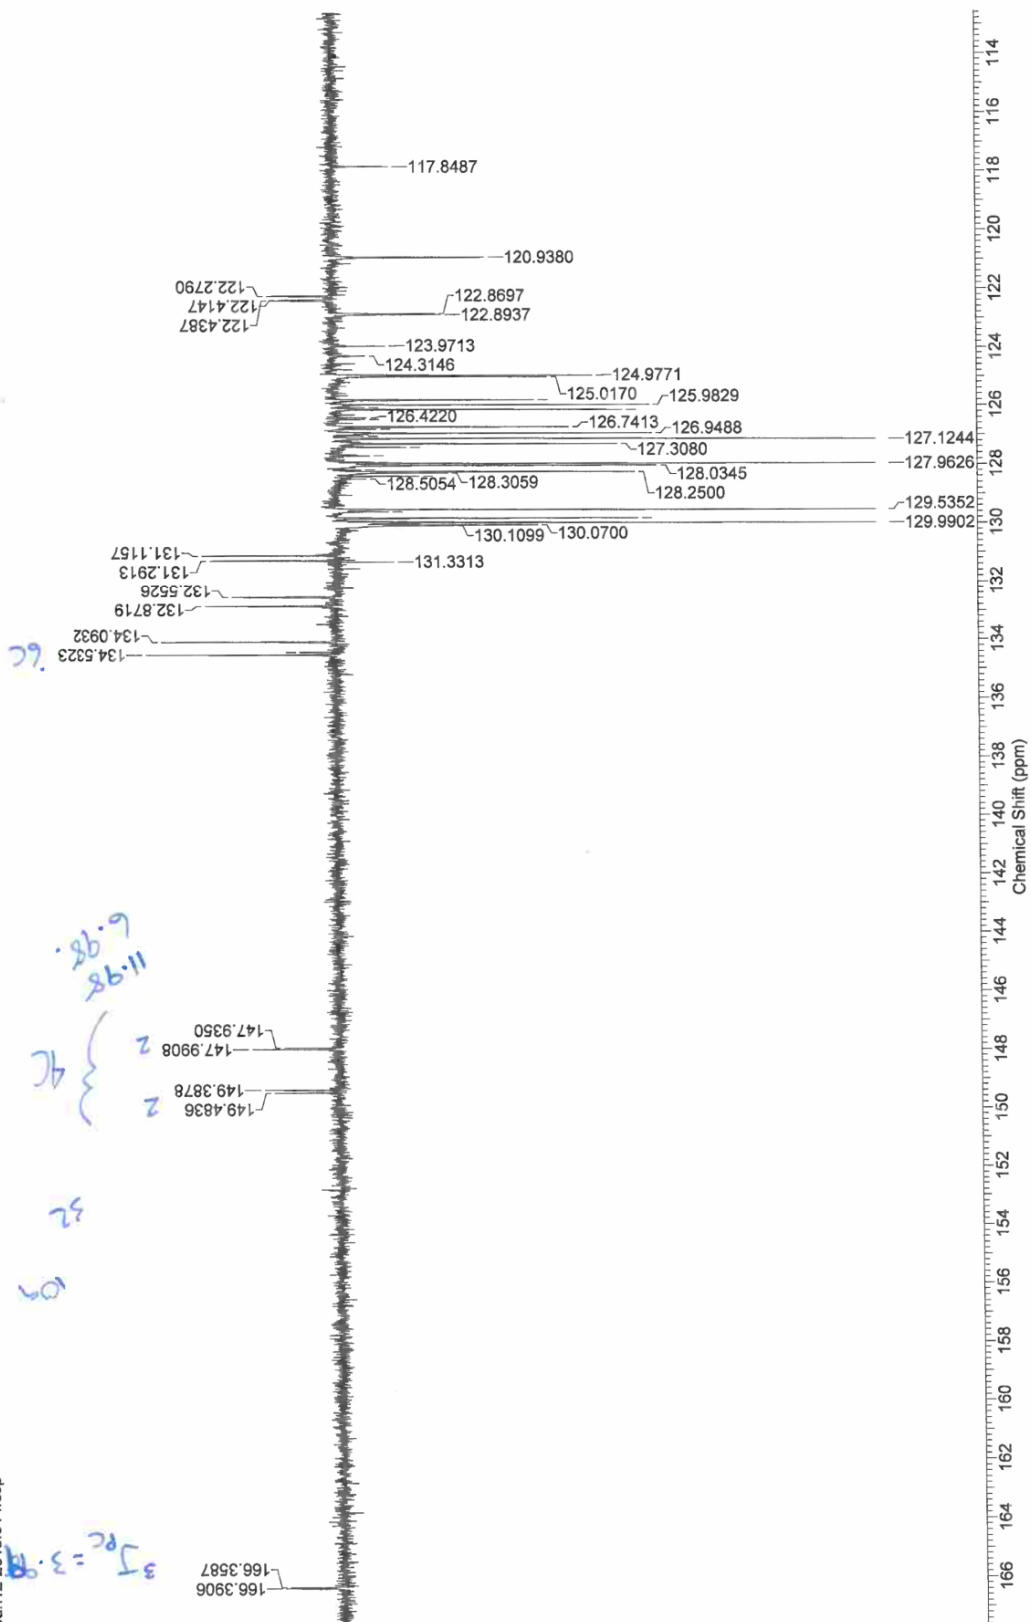

Jun12-2015.014.esp

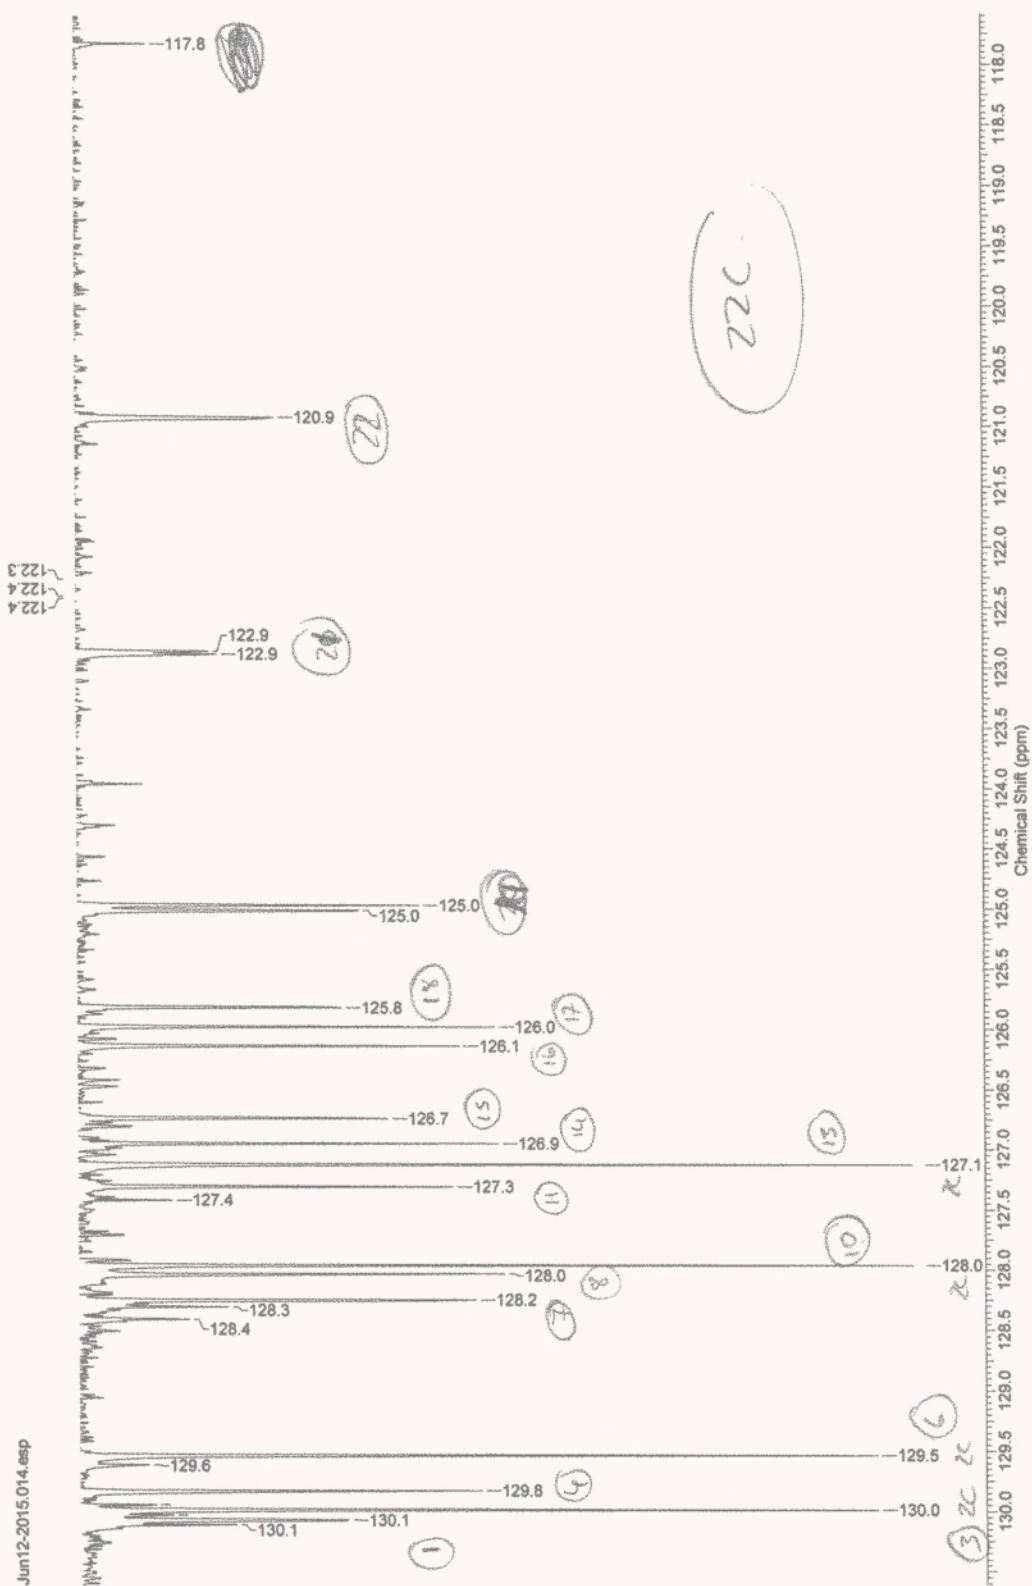



Jun12-2015.014.esp

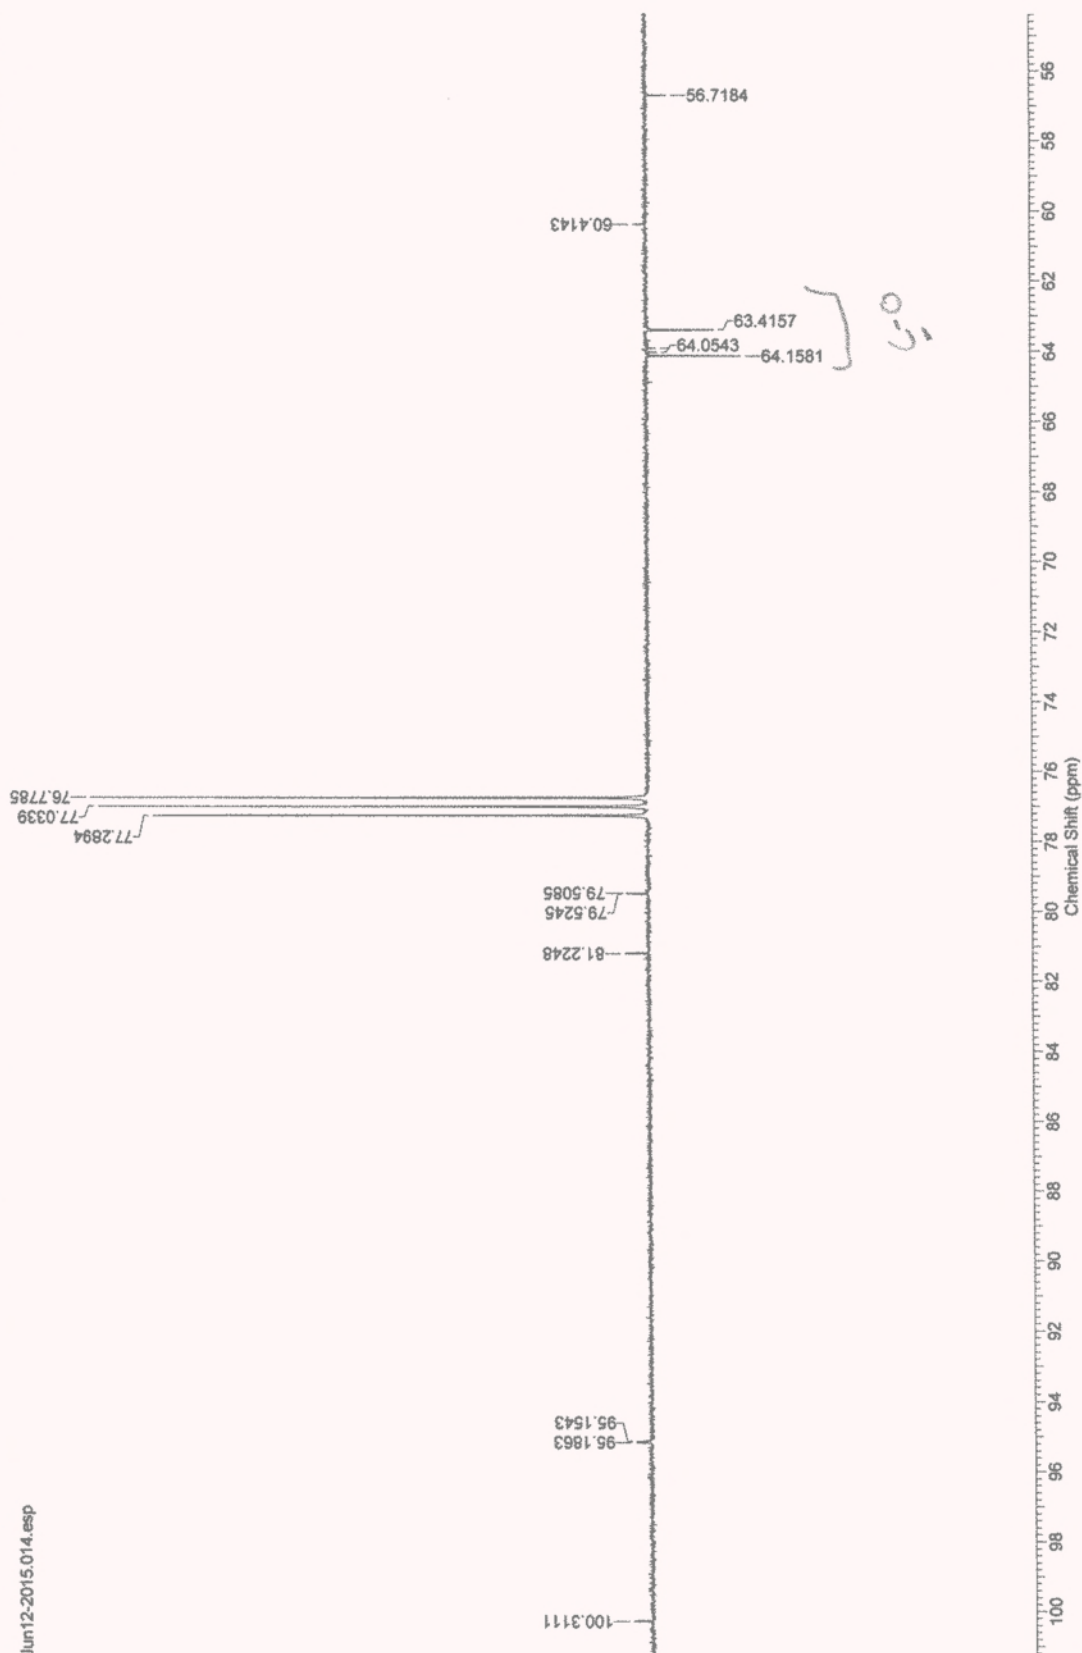

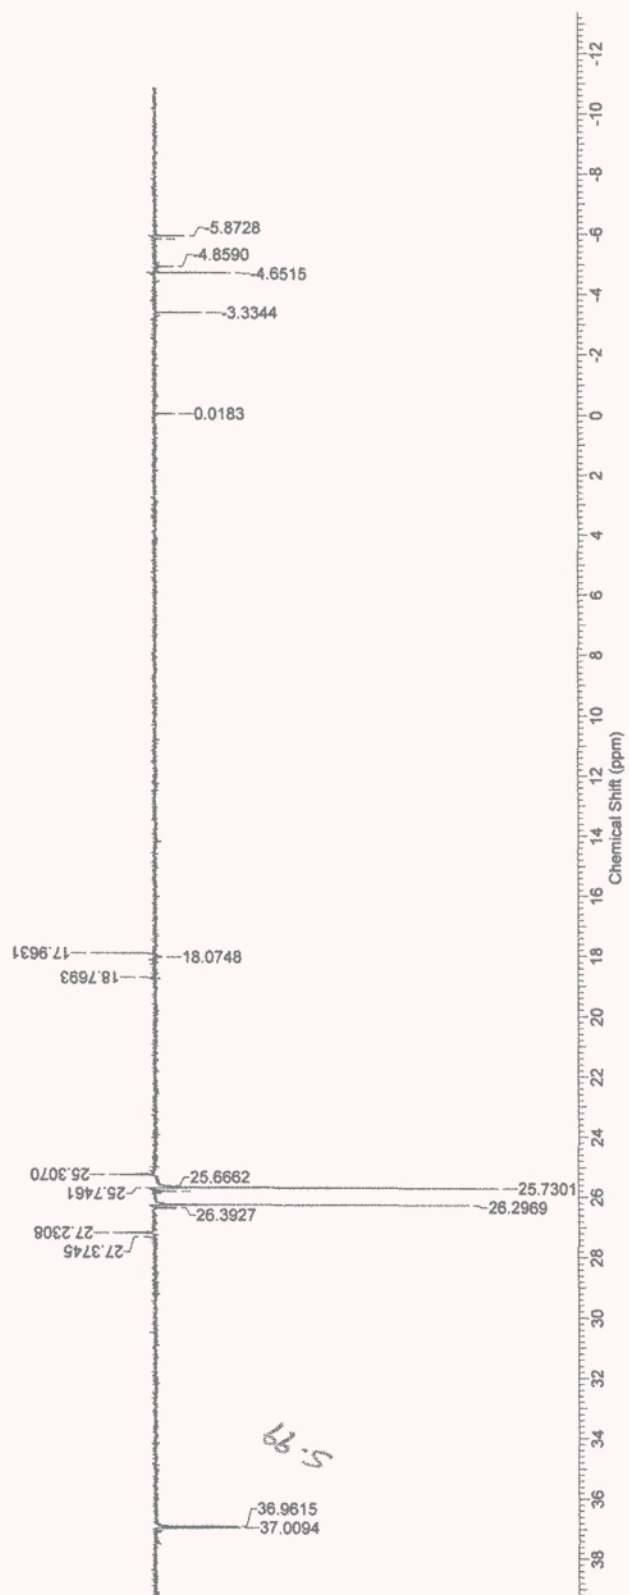

Chemist Roy Hodgkinson  
 1201-(S)-Monophas.  
 COSY.w CDC13 /opt/topspin3.2 RCH 25

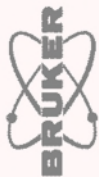

Current Data Parameters  
 NAME 1201-(S)-Monophas.  
 EXPNO 11  
 PROCNO 1  
 F2 - Acquisition Parameters  
 Date\_ 20150612  
 Time 14:04  
 INSTRUM spect  
 PROBHD 5 mm CPCHN 13C  
 PULPROG cosypprog4  
 F1 125.00 MHz  
 SOLVENT CDCl3  
 NS 1  
 DS 8  
 SWH 8964.518 Hz  
 FIDRES 3.197752 Hz  
 AQ 0.1269760 sec  
 RG 60.07  
 DE 65.000 usec  
 TE 298.0 K  
 D0 0.0000300 sec  
 D1 0.0001992 sec  
 D11 0.0002000 sec  
 D12 0.0002000 sec  
 D13 0.0000400 sec  
 D16 0.0002000 sec  
 D18 0.0002000 sec  
 D19 0.0002000 sec  
 CHANF1 500.1315872 MHz  
 SFO1 500.1315872 MHz  
 P1 9.10 usec  
 PC1 9.10 usec  
 P17 2500.00 usec  
 P18 13.000000 M  
 P19 1.000000 M  
 P210 1.000000 M  
 GRADIENT CHANNEL  
 GPCPM1[1] 500.1315872 MHz  
 GPCPM2[1] 500.1315872 MHz  
 GPCPM3[1] 500.1315872 MHz  
 P16 1000.00 usec  
 F1 - Acquisition Parameters  
 SFO1 500.1315872 MHz  
 FIDRES 63.0040322 Hz  
 SW 16.125 ppm  
 FWHM 0.00  
 F2 - Processing Parameters  
 SI 1024  
 SF 500.1315872 MHz  
 WDW 0  
 LB 0 Hz  
 GB 0  
 PC 1.40  
 F1 - Processing Parameters  
 SI 1024  
 SF 500.1315872 MHz  
 WDW 0  
 LB 0 Hz  
 GB 0

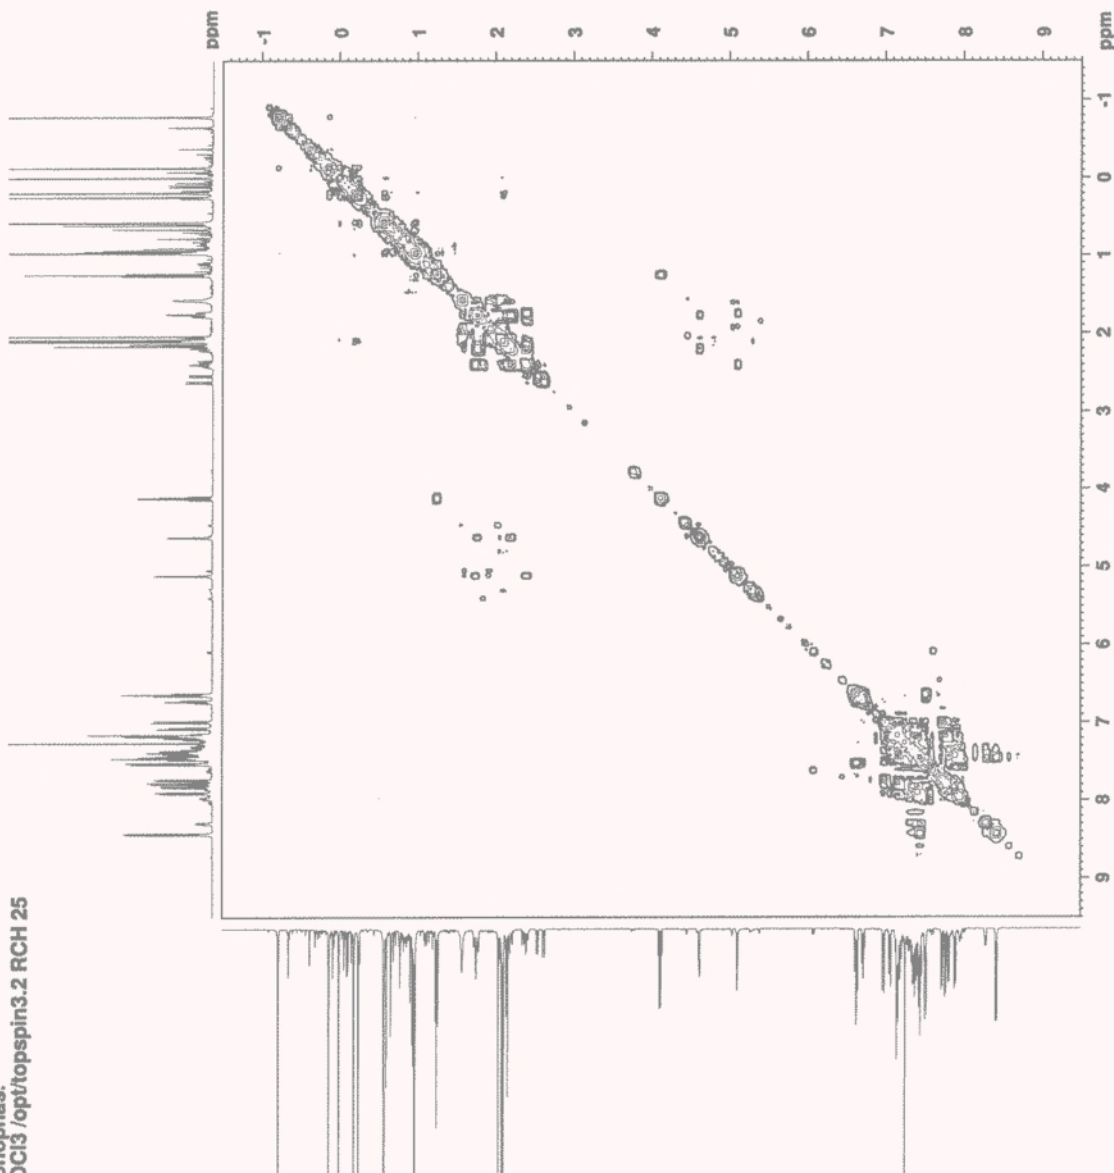

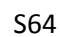

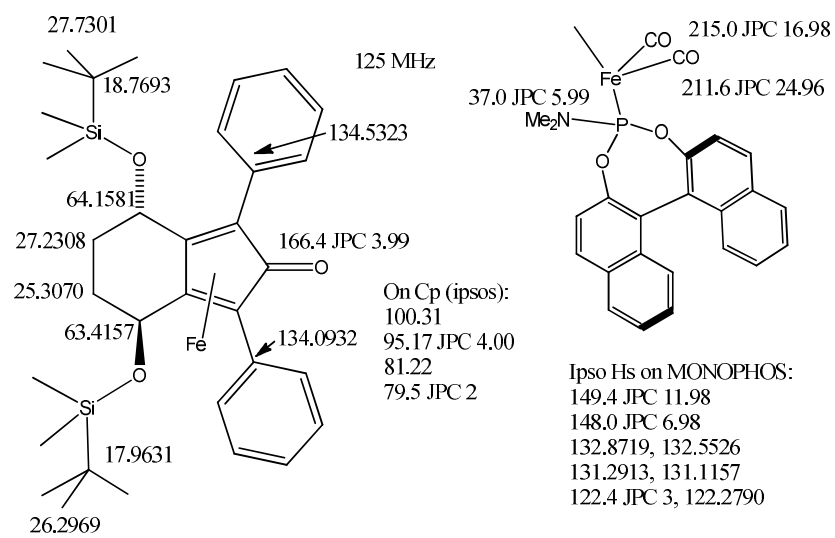

4 x SiMe: -3.3344, -4.6515, -4.8590, -5.8728.

Aromatic CH: 130.07, 129.99 (2C), 129.83, 129.54 (2C), 128.25, 128.03, 127.96 (2C), 127.31, 127.12 (2C), 126.95, 126.74, 126.14, 125.98, 125.82, 125.02, 124.98, 122.88 (JPC 2.5), 120.9. (22 ArH).

# P-NMR

$\delta_p$  (242 MHz,  $\text{CDCl}_3$ )

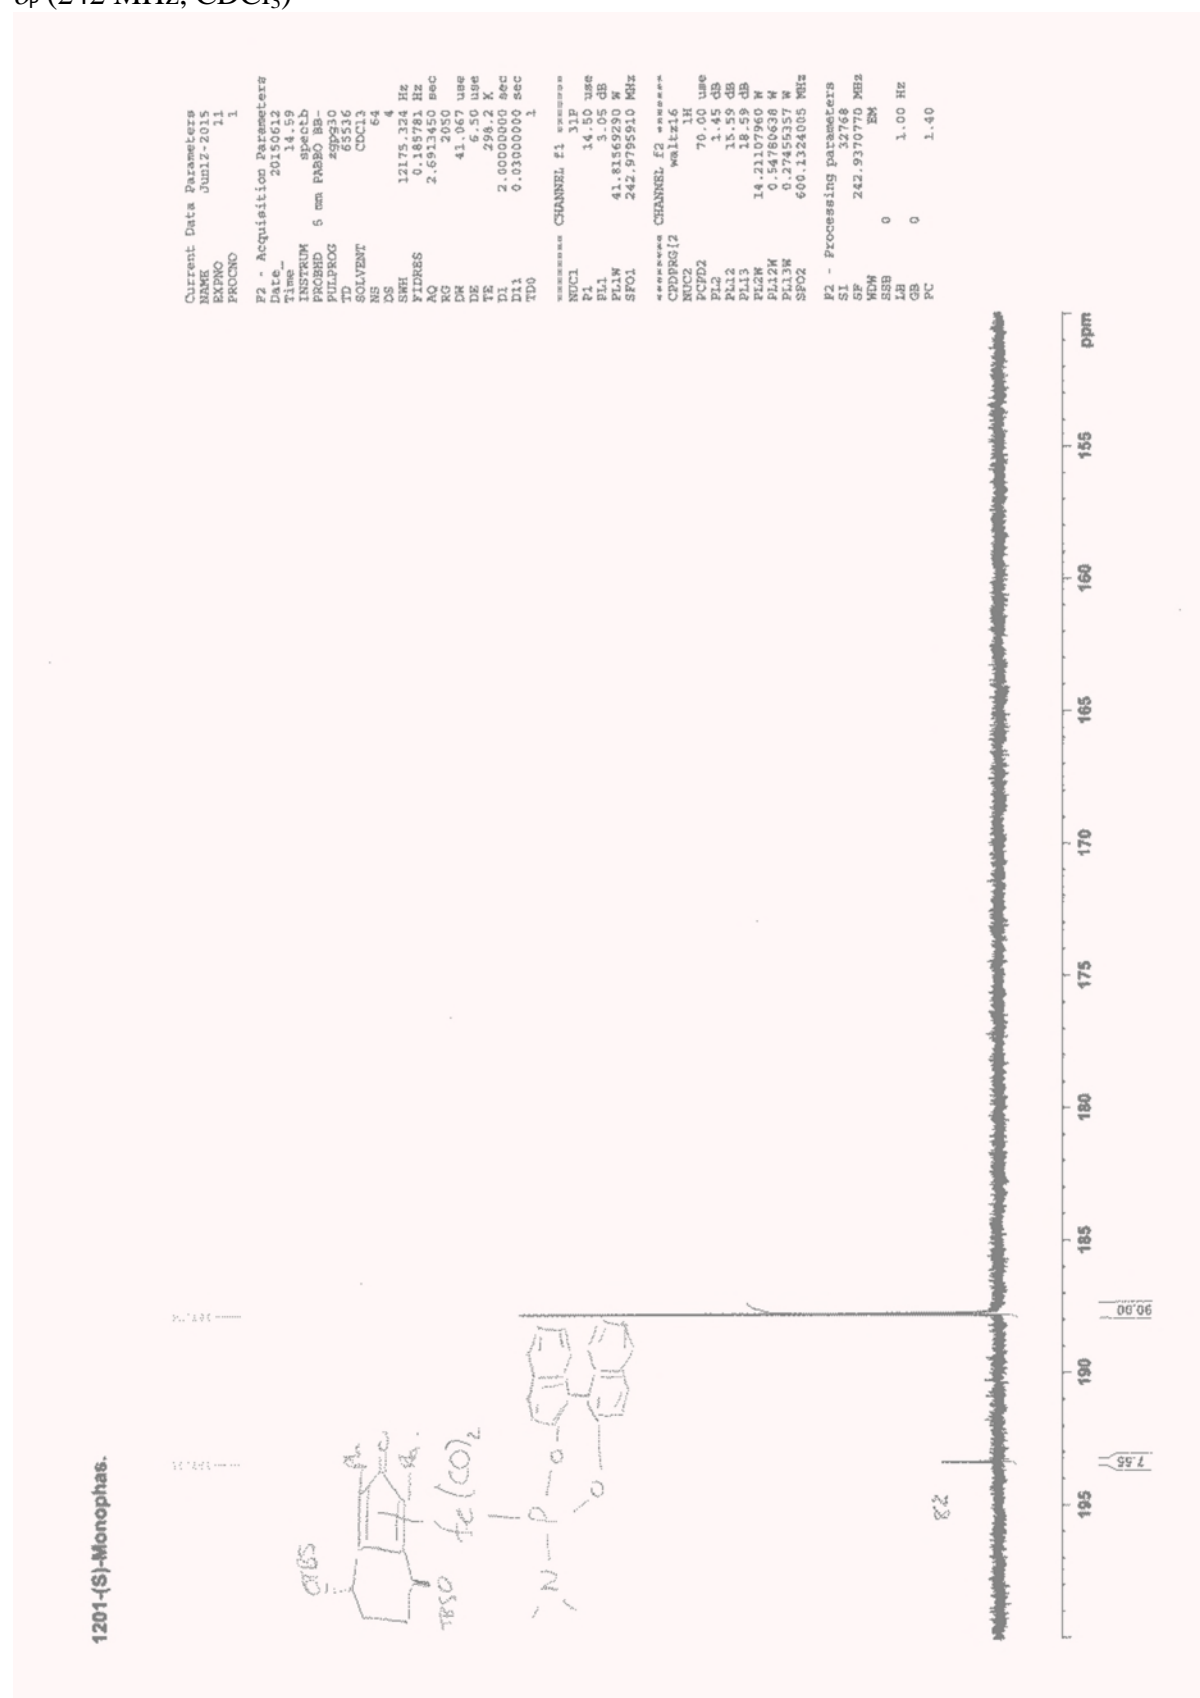

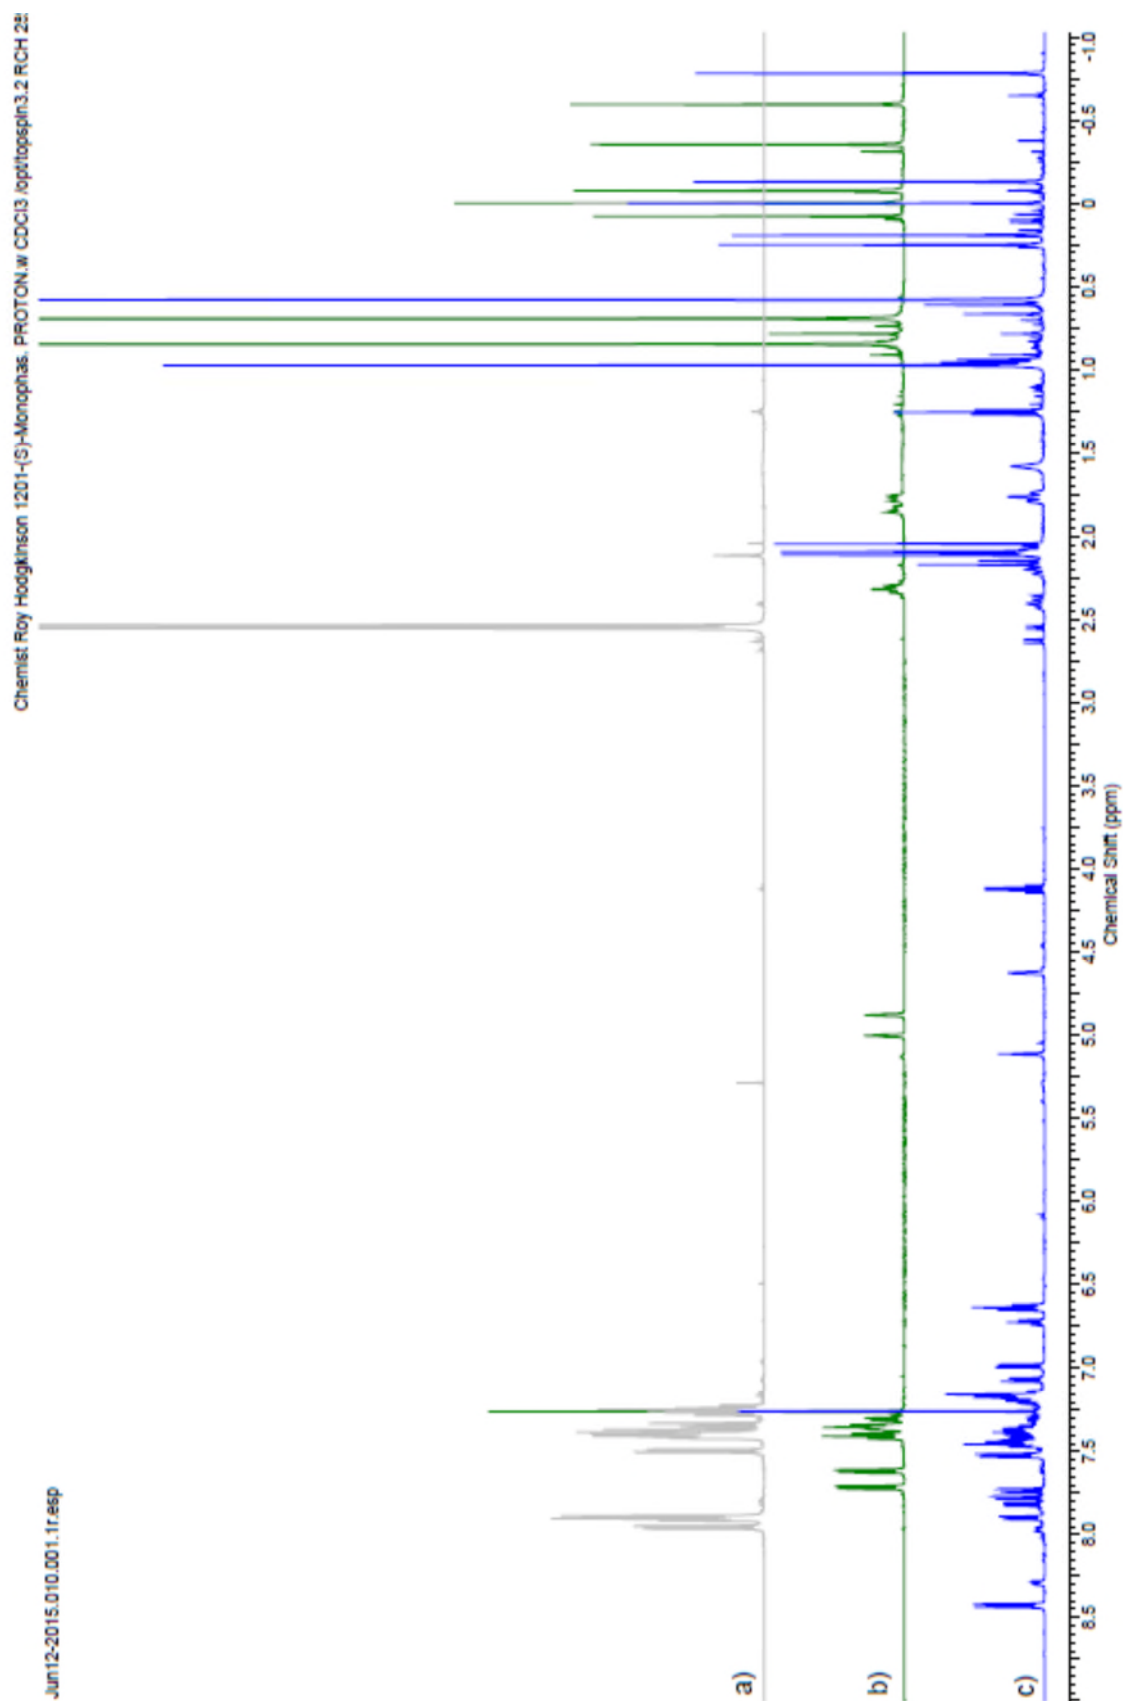

a) S-Monophos; b) OTBS Catalyst; c) OTBS catalyst with S-Monophos

Dicarbonyl-((4*S*,7*S*)-4,7-bis((*tert*-butyldimethylsilyl)oxy)-1,3-diphenyl-4,5,6,7-tetrahydro-2*H*-inden-2-one-(*R*)-*N,N*-dimethyldinaphtho[2,1-*d*:1',2'-*f*][1,3,2]dioxaphosphepin-4-amine) iron **25**.

$\delta_H$  (500 MHz,  $CDCl_3$ )

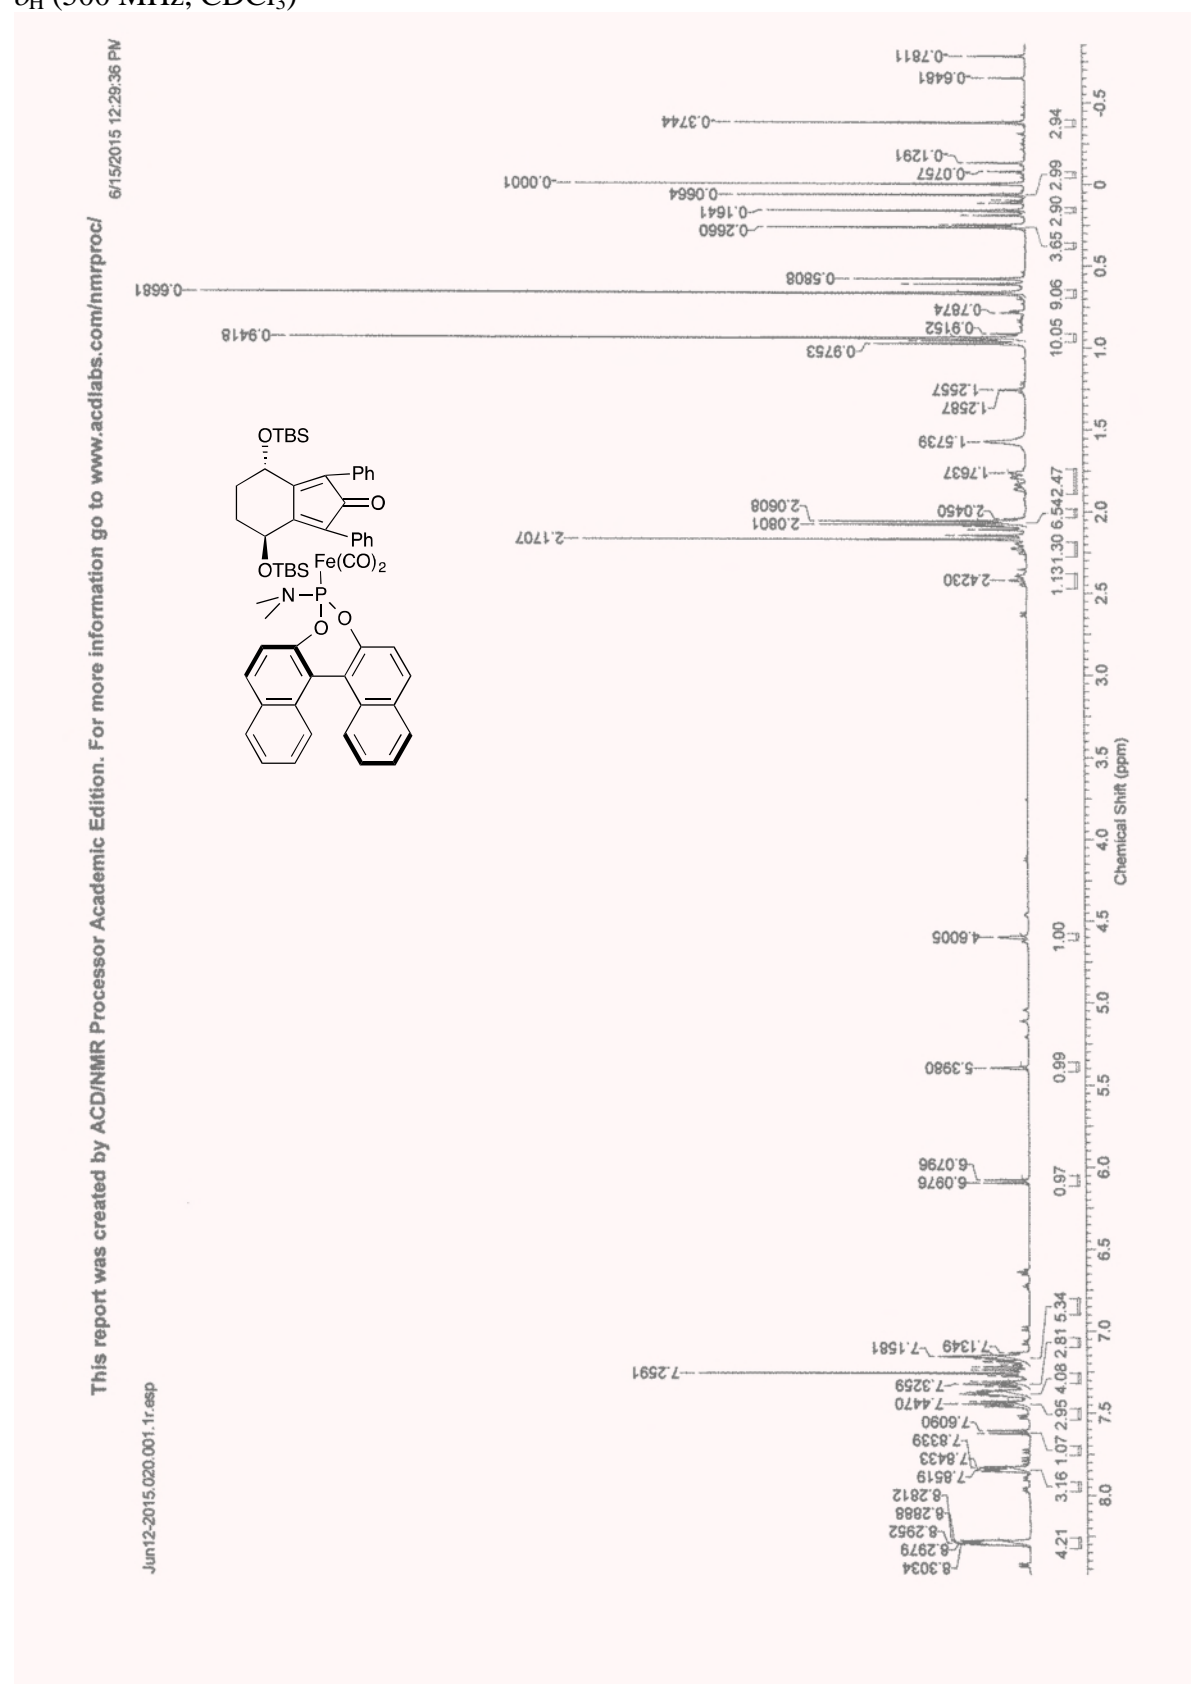



Jun12-2015.020.001.1r.esp

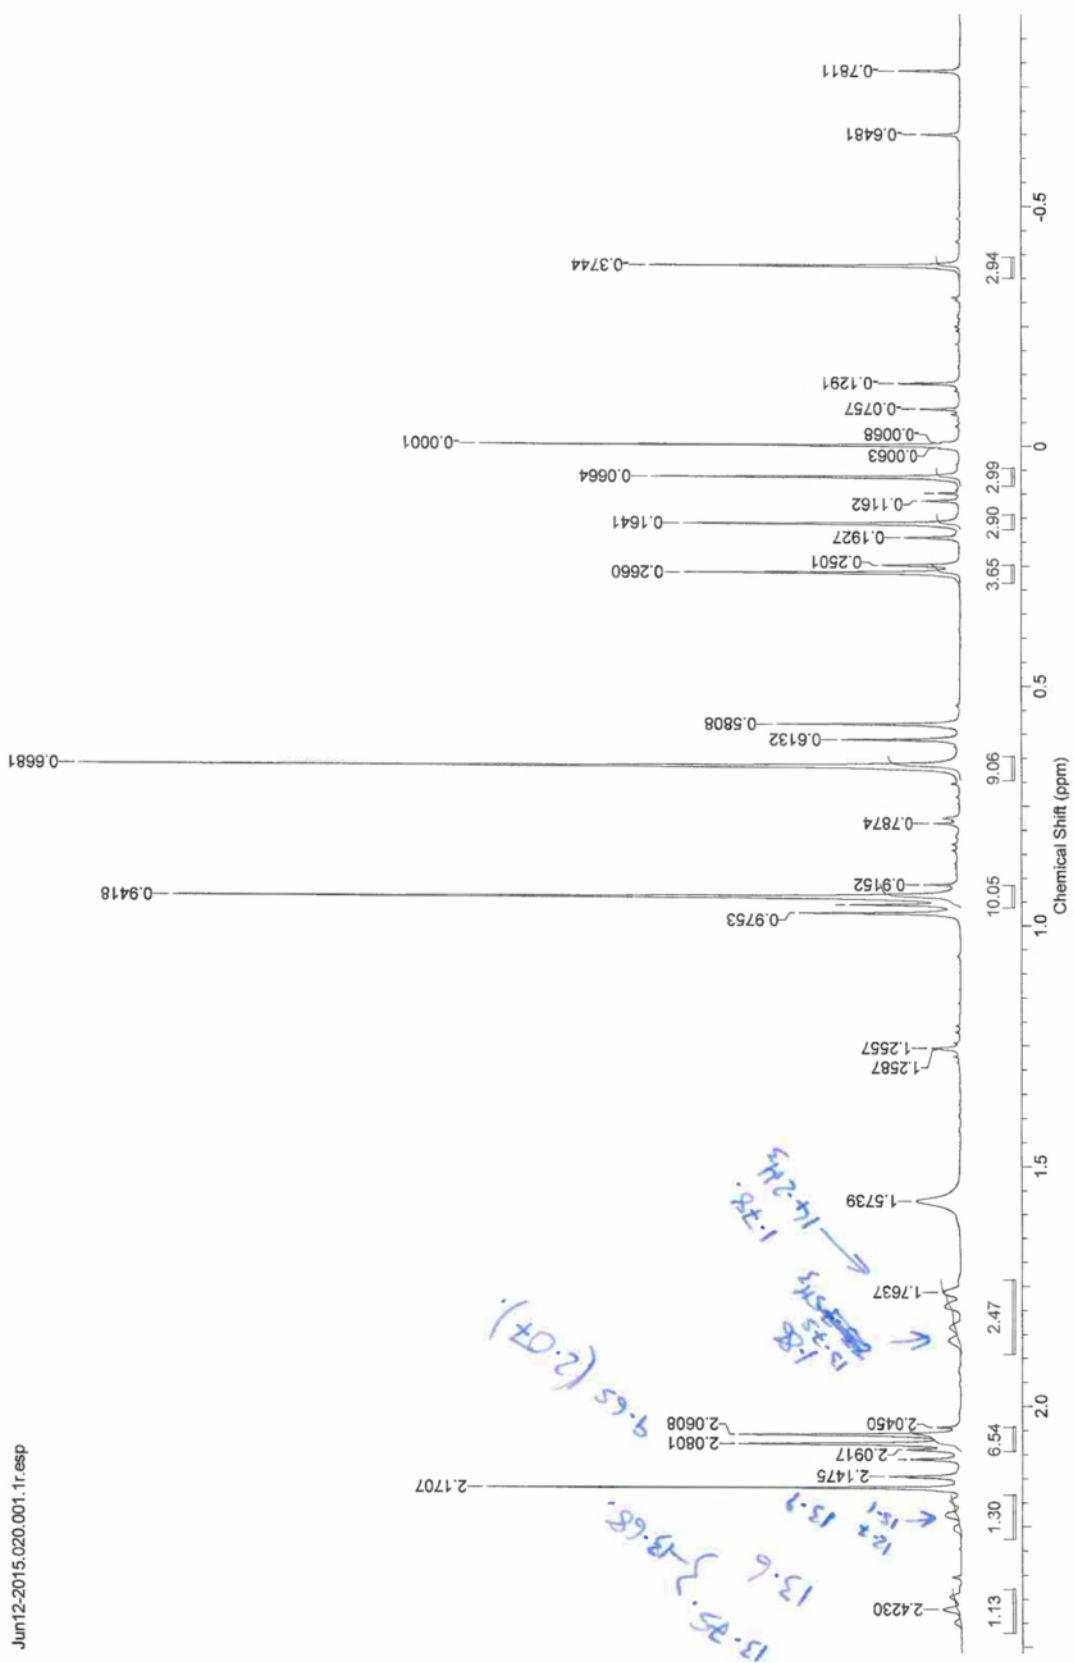

Jun12-2015.020.001.1r.eep

6/15/2015 12:28:50 PM

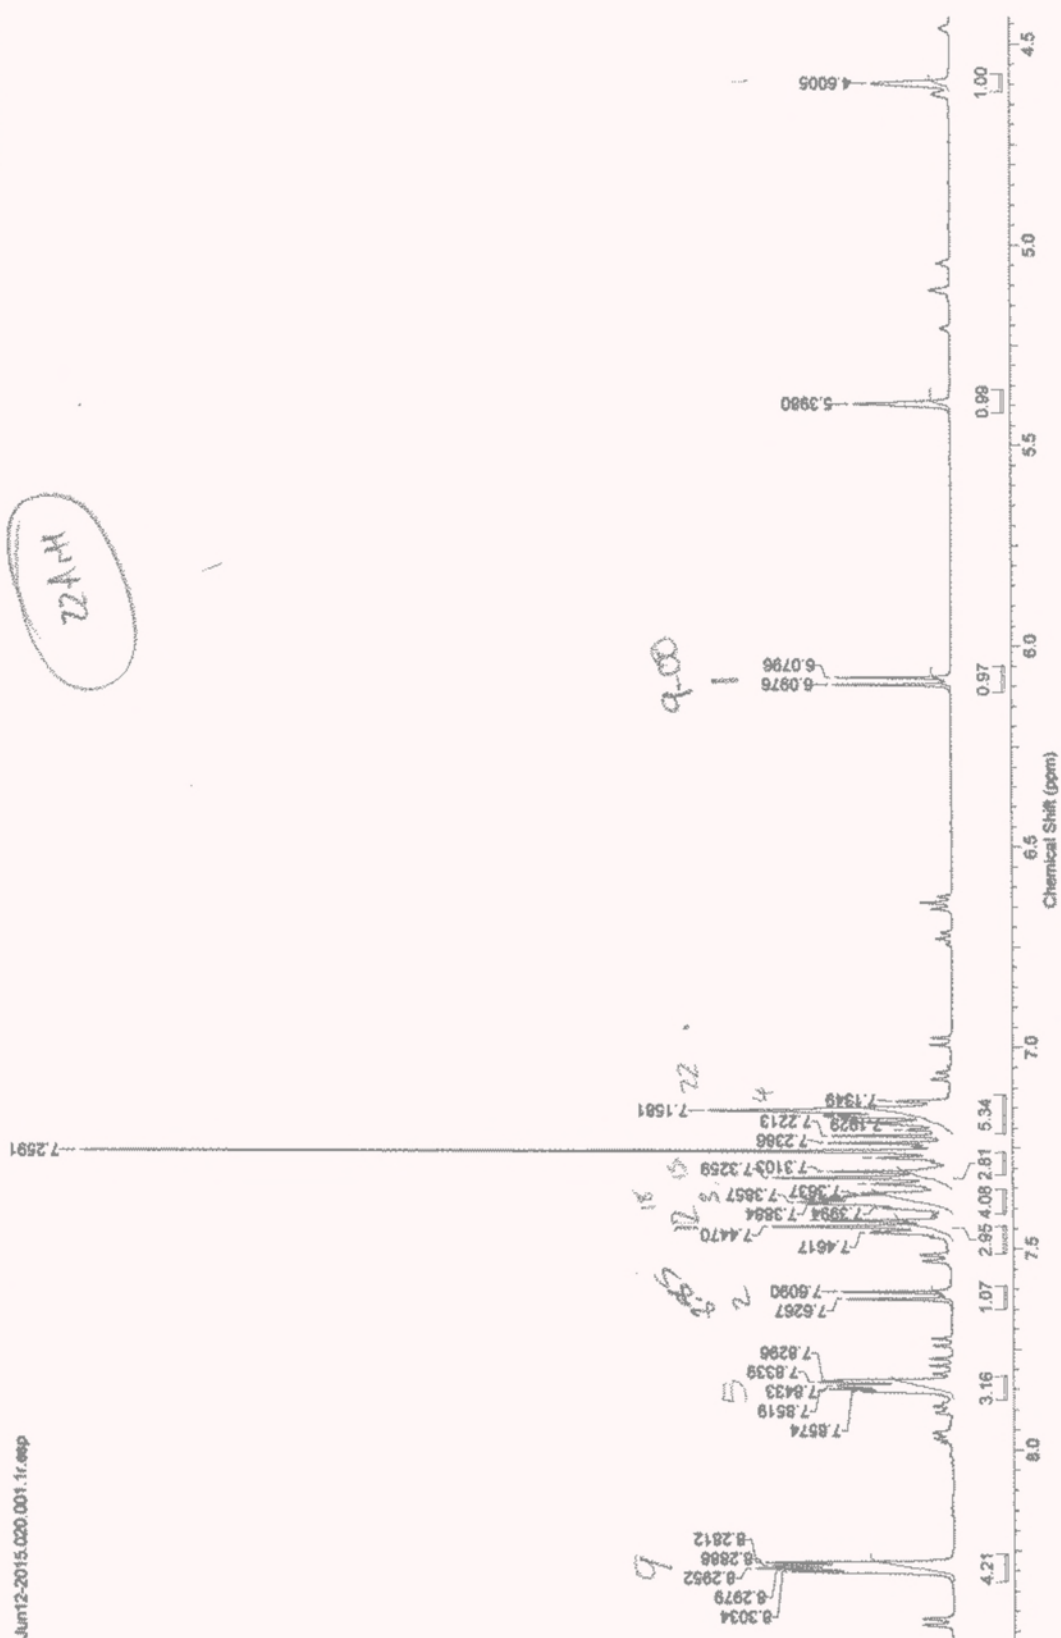

$\delta_C$  (125 MHz,  $CDCl_3$ )

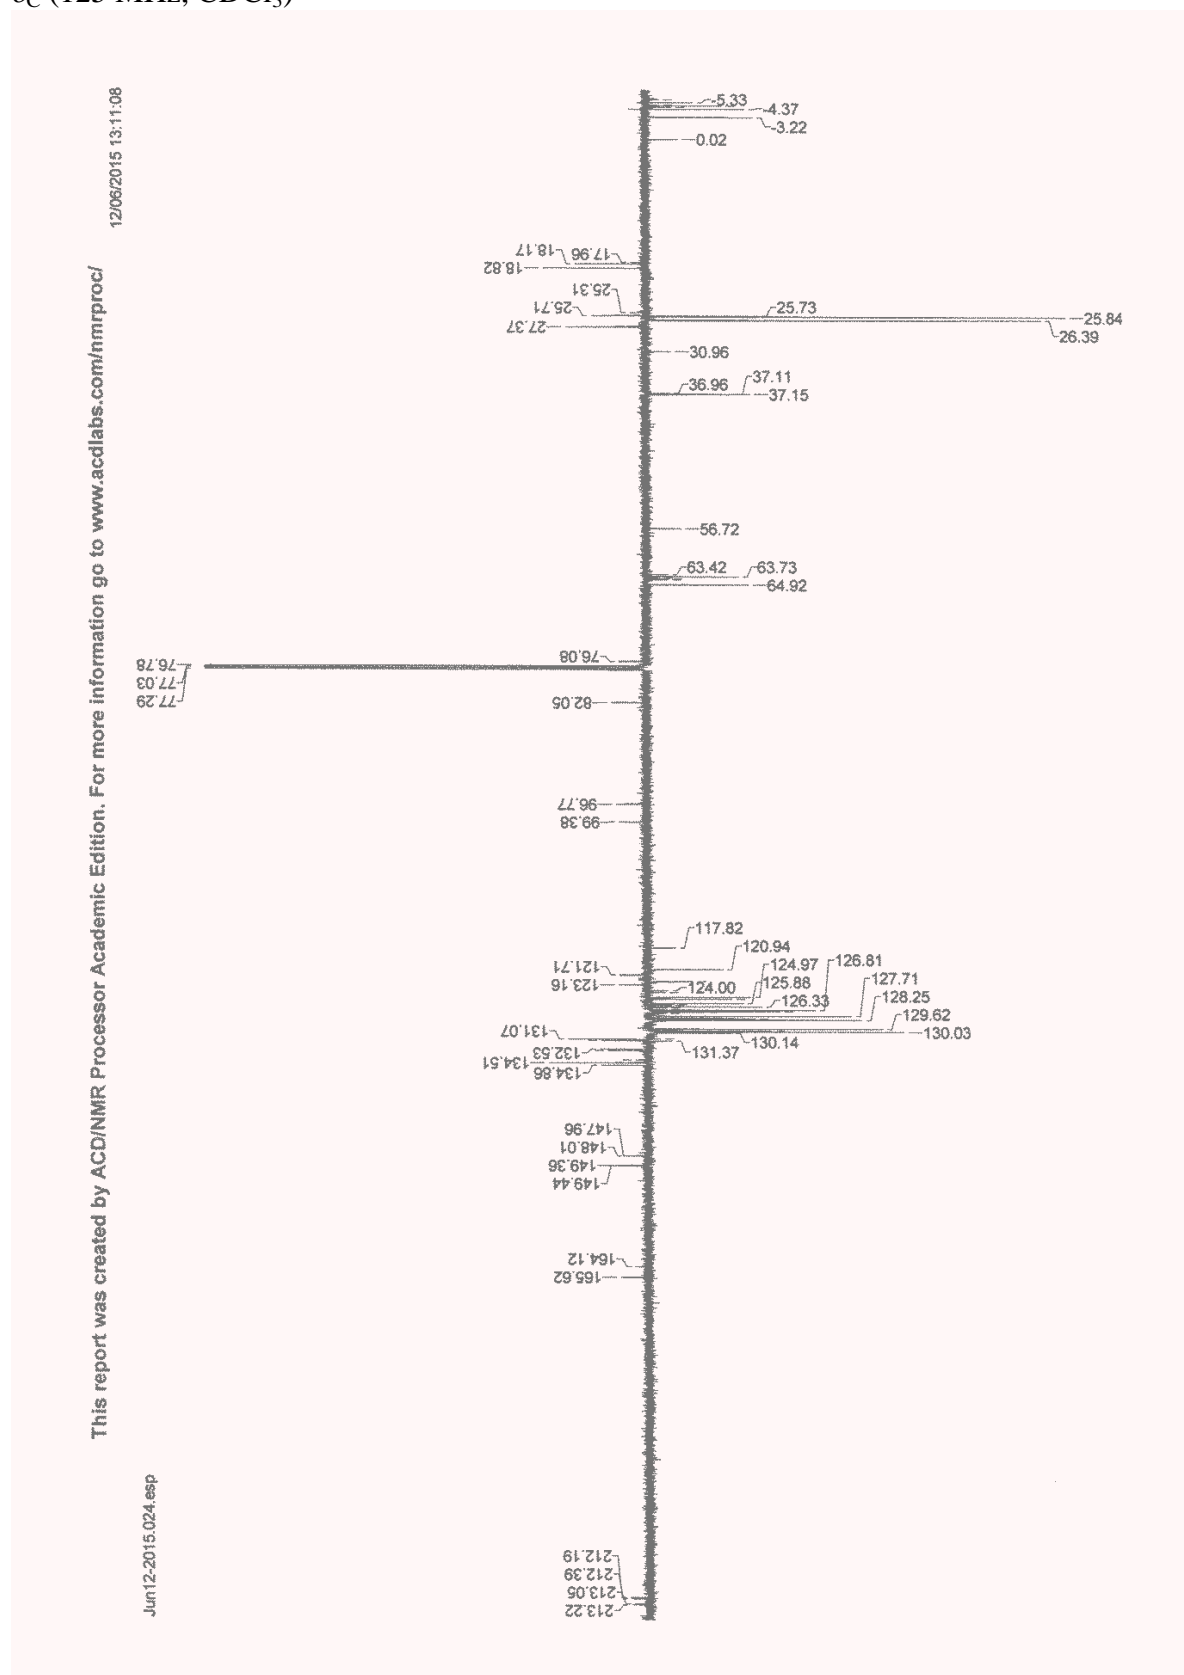

This report was created by ACD/NMR Processor Academic Edition. For more information go to [www.acdlabs.com/nmrproc/](http://www.acdlabs.com/nmrproc/)

6/15/2015 12:32:29 PM

Jun12-2015.024.001.1r.esp

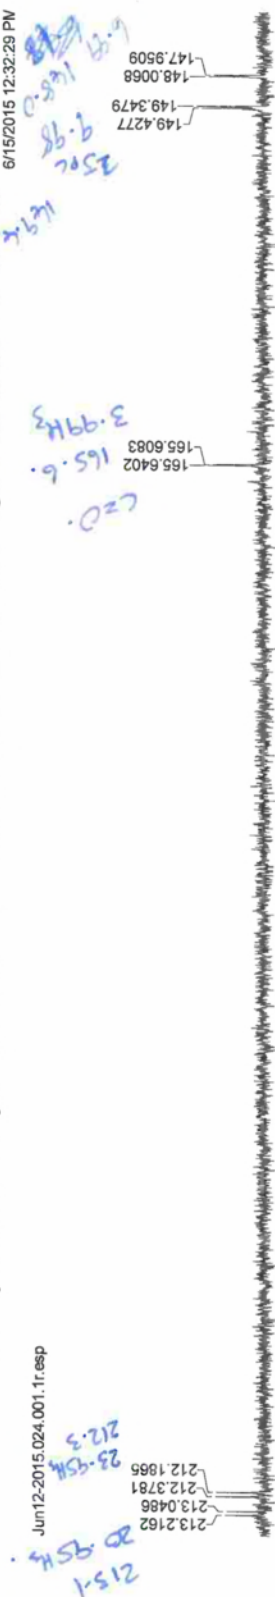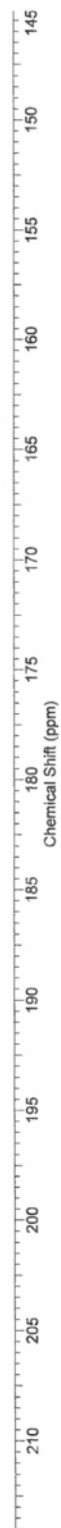

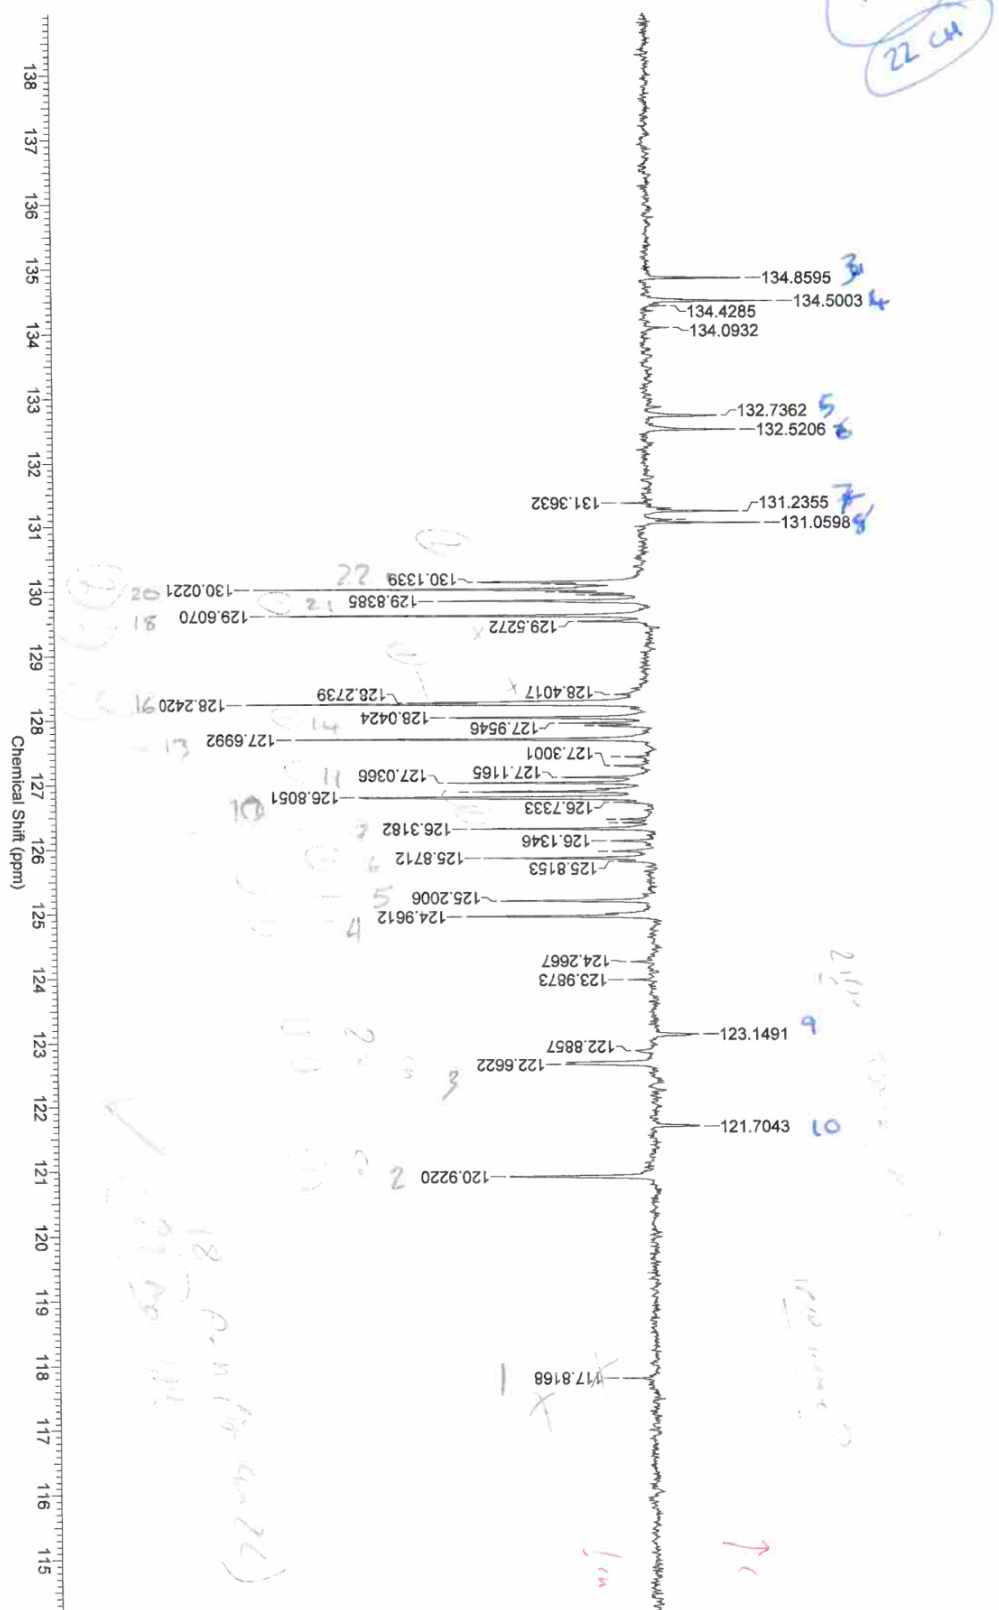



Jun12-2015.024.001.1.resp

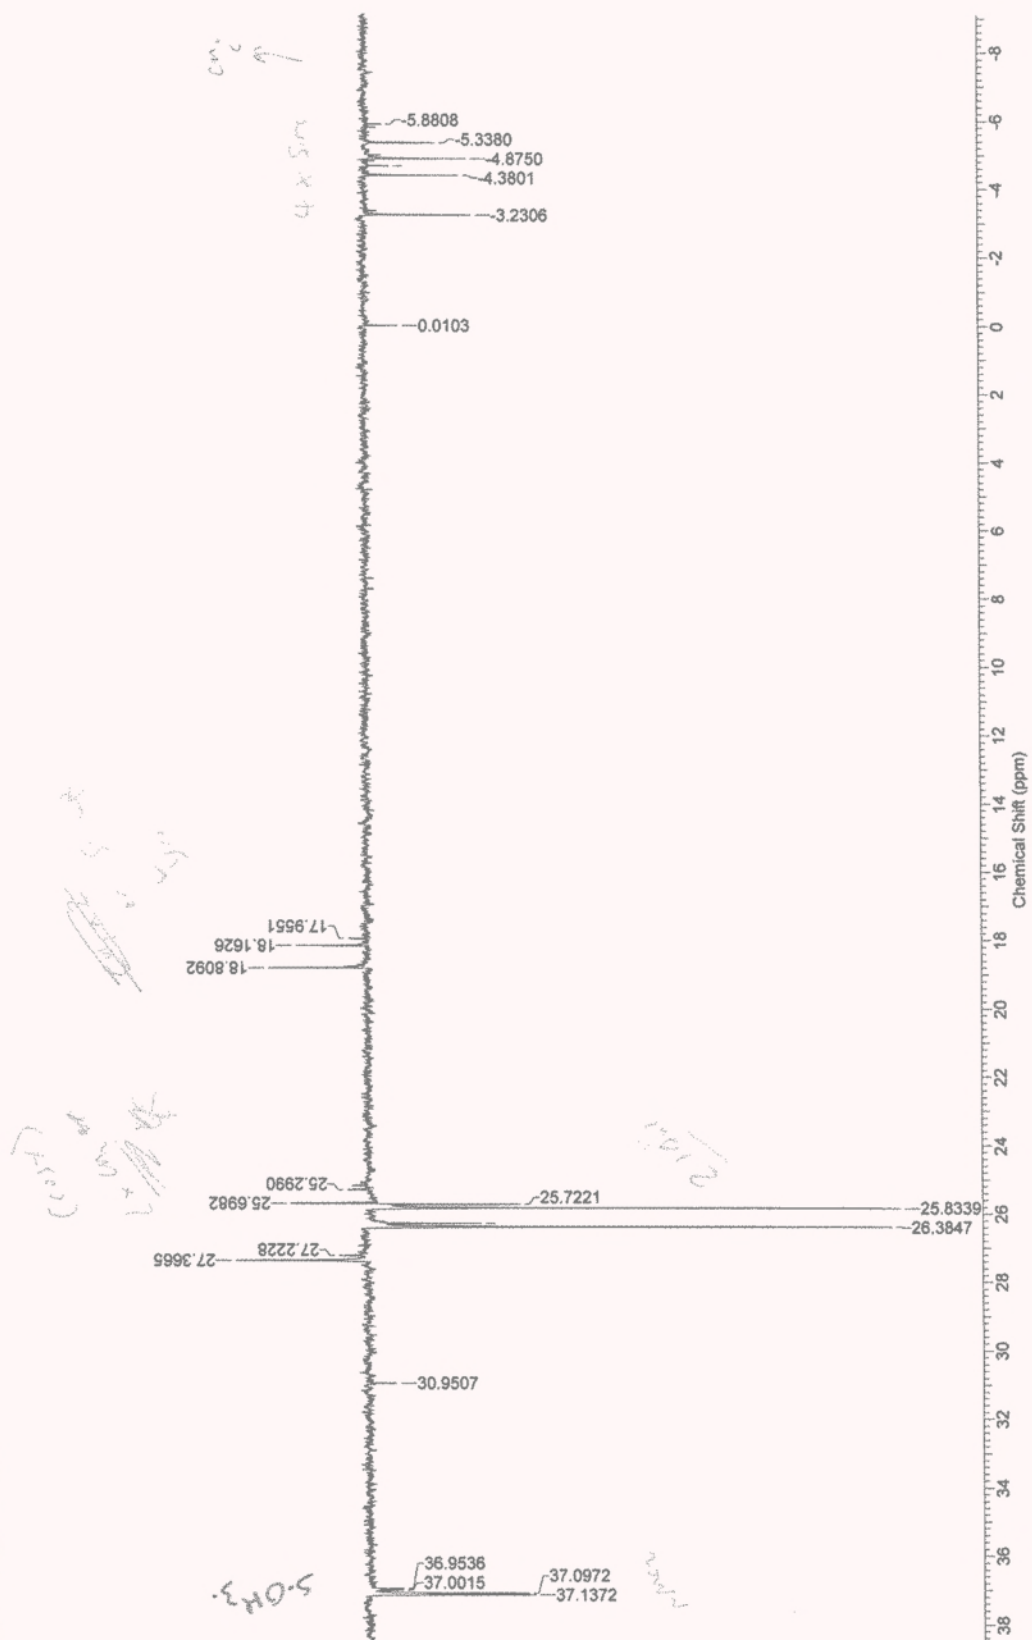

HSQC.w CDCl3 /opt/topspin3.2 RCH 26  
phas.

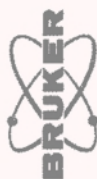

Current Data Parameters  
NAME HSQC  
EXPNO 2  
PROCNO 1

F2 - Acquisition Parameters

Date\_ 20150612  
Time 13.49  
INSTRUM spect  
PROBHD 5 mm QNP1H 13C  
PULPROG zgpg30  
hacqetcp  
SOLVENT CDCl3  
NS 4  
DS 4

SI 16  
FIDRES 5434.716 Hz  
AQ 5.307405 Hz  
RG 327.500  
DM 32.605 usec  
DE 40.00 usec  
TE 300.2 K  
CNP2 145.000000 K  
DO 0.0000000 sec  
D1 1.4815798 sec  
D11 0.0100000 sec  
D16 0.0300000 sec  
D17 0.0002000 sec  
D18 0.0001895 sec  
ZDPTN5

===== CHANNEL f1 =====  
NUC1 13C  
P1 9.10 usec  
PL1 0 usec  
PL12 13.0000000 M

===== CHANNEL f2 =====  
NUC2 13C  
P2 9.10 usec  
PL2 0 usec  
PL22 24.0000000 M  
PL12 0.5126603 M

===== GRADIENT CHANNEL =====  
GPMAN(1) SMSQ10.100  
GPMAN(2) SMSQ10.100  
CP22 20.10 %  
P16 1000.00 usec

F1 - Acquisition parameters  
TD 65536  
SI 16  
SF 125.7697355 MHz  
FIDRES 5434.716 Hz  
SFORES 206.679901 Hz  
SM 210.345 ppm  
FPMODE Echo-Antiecho

F2 - Processing parameters  
SI 16  
SF 125.7697355 MHz  
SFORES 206.679901 Hz  
SM 210.345 ppm  
FPMODE Echo-Antiecho  
SI 16  
SF 125.7697355 MHz  
SFORES 206.679901 Hz  
SM 210.345 ppm  
FPMODE Echo-Antiecho

F1 - Processing parameters  
SI 16  
SF 125.7697355 MHz  
SFORES 206.679901 Hz  
SM 210.345 ppm  
FPMODE Echo-Antiecho  
SI 16  
SF 125.7697355 MHz  
SFORES 206.679901 Hz  
SM 210.345 ppm  
FPMODE Echo-Antiecho

F2 - Processing parameters  
SI 16  
SF 125.7697355 MHz  
SFORES 206.679901 Hz  
SM 210.345 ppm  
FPMODE Echo-Antiecho  
SI 16  
SF 125.7697355 MHz  
SFORES 206.679901 Hz  
SM 210.345 ppm  
FPMODE Echo-Antiecho

F1 - Processing parameters  
SI 16  
SF 125.7697355 MHz  
SFORES 206.679901 Hz  
SM 210.345 ppm  
FPMODE Echo-Antiecho  
SI 16  
SF 125.7697355 MHz  
SFORES 206.679901 Hz  
SM 210.345 ppm  
FPMODE Echo-Antiecho

F2 - Processing parameters  
SI 16  
SF 125.7697355 MHz  
SFORES 206.679901 Hz  
SM 210.345 ppm  
FPMODE Echo-Antiecho  
SI 16  
SF 125.7697355 MHz  
SFORES 206.679901 Hz  
SM 210.345 ppm  
FPMODE Echo-Antiecho

F1 - Processing parameters  
SI 16  
SF 125.7697355 MHz  
SFORES 206.679901 Hz  
SM 210.345 ppm  
FPMODE Echo-Antiecho  
SI 16  
SF 125.7697355 MHz  
SFORES 206.679901 Hz  
SM 210.345 ppm  
FPMODE Echo-Antiecho

F2 - Processing parameters  
SI 16  
SF 125.7697355 MHz  
SFORES 206.679901 Hz  
SM 210.345 ppm  
FPMODE Echo-Antiecho  
SI 16  
SF 125.7697355 MHz  
SFORES 206.679901 Hz  
SM 210.345 ppm  
FPMODE Echo-Antiecho

F1 - Processing parameters  
SI 16  
SF 125.7697355 MHz  
SFORES 206.679901 Hz  
SM 210.345 ppm  
FPMODE Echo-Antiecho  
SI 16  
SF 125.7697355 MHz  
SFORES 206.679901 Hz  
SM 210.345 ppm  
FPMODE Echo-Antiecho

F2 - Processing parameters  
SI 16  
SF 125.7697355 MHz  
SFORES 206.679901 Hz  
SM 210.345 ppm  
FPMODE Echo-Antiecho  
SI 16  
SF 125.7697355 MHz  
SFORES 206.679901 Hz  
SM 210.345 ppm  
FPMODE Echo-Antiecho

F1 - Processing parameters  
SI 16  
SF 125.7697355 MHz  
SFORES 206.679901 Hz  
SM 210.345 ppm  
FPMODE Echo-Antiecho  
SI 16  
SF 125.7697355 MHz  
SFORES 206.679901 Hz  
SM 210.345 ppm  
FPMODE Echo-Antiecho

F2 - Processing parameters  
SI 16  
SF 125.7697355 MHz  
SFORES 206.679901 Hz  
SM 210.345 ppm  
FPMODE Echo-Antiecho  
SI 16  
SF 125.7697355 MHz  
SFORES 206.679901 Hz  
SM 210.345 ppm  
FPMODE Echo-Antiecho

F1 - Processing parameters  
SI 16  
SF 125.7697355 MHz  
SFORES 206.679901 Hz  
SM 210.345 ppm  
FPMODE Echo-Antiecho  
SI 16  
SF 125.7697355 MHz  
SFORES 206.679901 Hz  
SM 210.345 ppm  
FPMODE Echo-Antiecho

F2 - Processing parameters  
SI 16  
SF 125.7697355 MHz  
SFORES 206.679901 Hz  
SM 210.345 ppm  
FPMODE Echo-Antiecho  
SI 16  
SF 125.7697355 MHz  
SFORES 206.679901 Hz  
SM 210.345 ppm  
FPMODE Echo-Antiecho

F1 - Processing parameters  
SI 16  
SF 125.7697355 MHz  
SFORES 206.679901 Hz  
SM 210.345 ppm  
FPMODE Echo-Antiecho  
SI 16  
SF 125.7697355 MHz  
SFORES 206.679901 Hz  
SM 210.345 ppm  
FPMODE Echo-Antiecho

F2 - Processing parameters  
SI 16  
SF 125.7697355 MHz  
SFORES 206.679901 Hz  
SM 210.345 ppm  
FPMODE Echo-Antiecho  
SI 16  
SF 125.7697355 MHz  
SFORES 206.679901 Hz  
SM 210.345 ppm  
FPMODE Echo-Antiecho

F1 - Processing parameters  
SI 16  
SF 125.7697355 MHz  
SFORES 206.679901 Hz  
SM 210.345 ppm  
FPMODE Echo-Antiecho  
SI 16  
SF 125.7697355 MHz  
SFORES 206.679901 Hz  
SM 210.345 ppm  
FPMODE Echo-Antiecho

F2 - Processing parameters  
SI 16  
SF 125.7697355 MHz  
SFORES 206.679901 Hz  
SM 210.345 ppm  
FPMODE Echo-Antiecho  
SI 16  
SF 125.7697355 MHz  
SFORES 206.679901 Hz  
SM 210.345 ppm  
FPMODE Echo-Antiecho

F1 - Processing parameters  
SI 16  
SF 125.7697355 MHz  
SFORES 206.679901 Hz  
SM 210.345 ppm  
FPMODE Echo-Antiecho  
SI 16  
SF 125.7697355 MHz  
SFORES 206.679901 Hz  
SM 210.345 ppm  
FPMODE Echo-Antiecho

F2 - Processing parameters  
SI 16  
SF 125.7697355 MHz  
SFORES 206.679901 Hz  
SM 210.345 ppm  
FPMODE Echo-Antiecho  
SI 16  
SF 125.7697355 MHz  
SFORES 206.679901 Hz  
SM 210.345 ppm  
FPMODE Echo-Antiecho

F1 - Processing parameters  
SI 16  
SF 125.7697355 MHz  
SFORES 206.679901 Hz  
SM 210.345 ppm  
FPMODE Echo-Antiecho  
SI 16  
SF 125.7697355 MHz  
SFORES 206.679901 Hz  
SM 210.345 ppm  
FPMODE Echo-Antiecho

F2 - Processing parameters  
SI 16  
SF 125.7697355 MHz  
SFORES 206.679901 Hz  
SM 210.345 ppm  
FPMODE Echo-Antiecho  
SI 16  
SF 125.7697355 MHz  
SFORES 206.679901 Hz  
SM 210.345 ppm  
FPMODE Echo-Antiecho

F1 - Processing parameters  
SI 16  
SF 125.7697355 MHz  
SFORES 206.679901 Hz  
SM 210.345 ppm  
FPMODE Echo-Antiecho  
SI 16  
SF 125.7697355 MHz  
SFORES 206.679901 Hz  
SM 210.345 ppm  
FPMODE Echo-Antiecho

F2 - Processing parameters  
SI 16  
SF 125.7697355 MHz  
SFORES 206.679901 Hz  
SM 210.345 ppm  
FPMODE Echo-Antiecho  
SI 16  
SF 125.7697355 MHz  
SFORES 206.679901 Hz  
SM 210.345 ppm  
FPMODE Echo-Antiecho

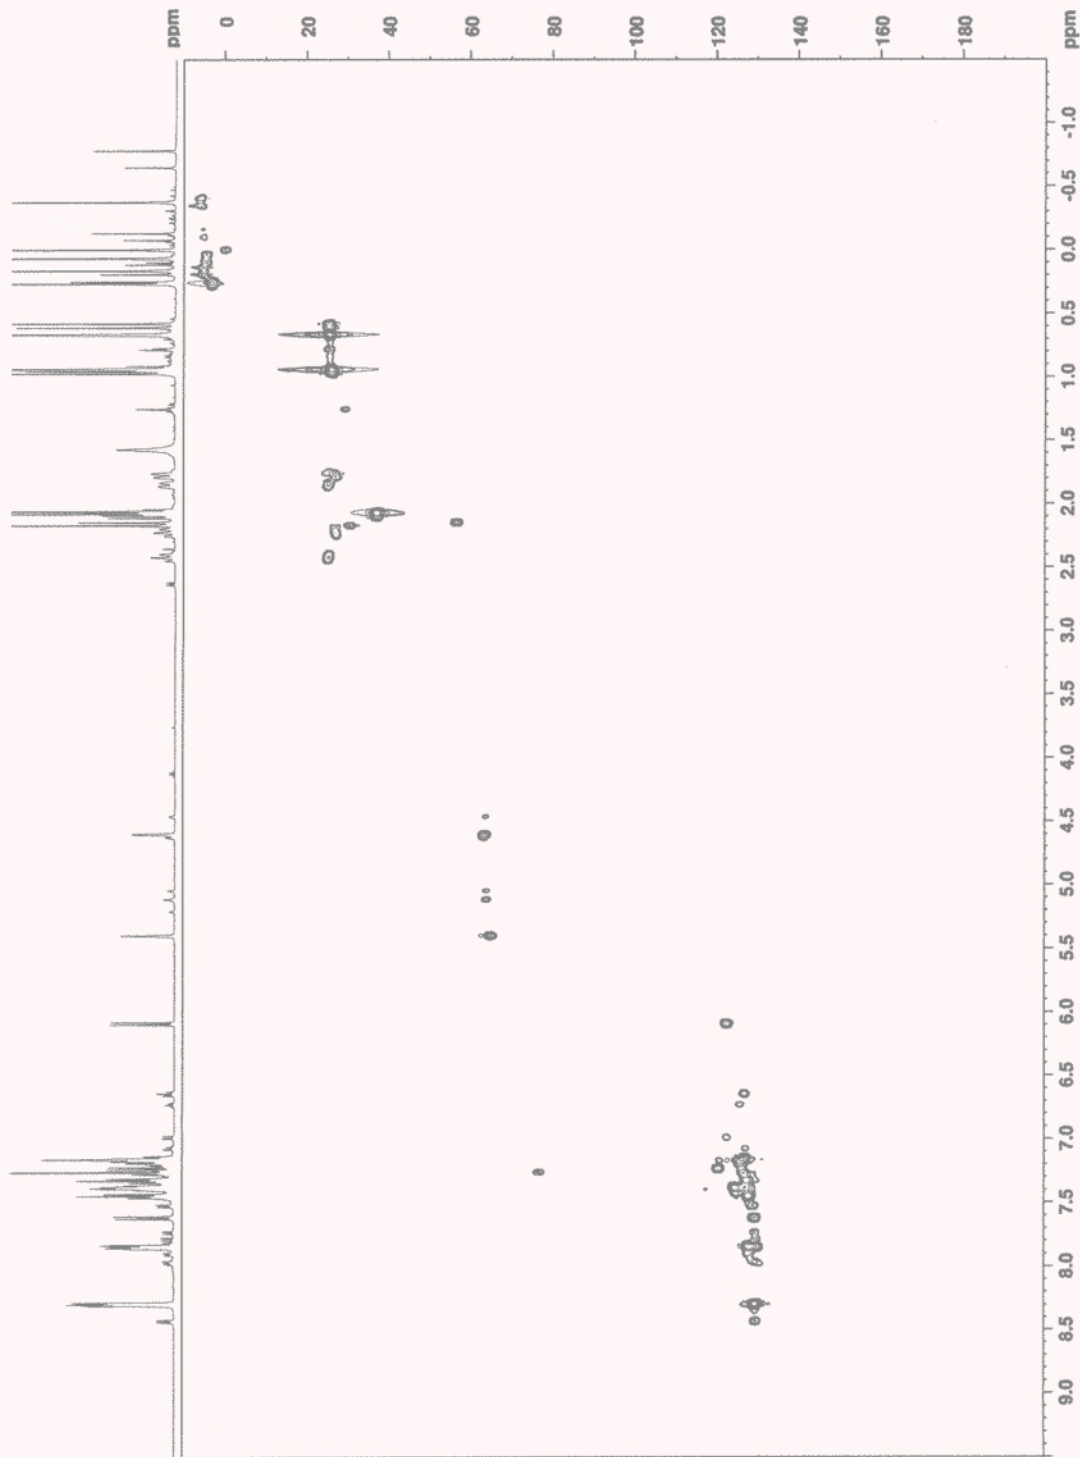



|                             |                |                            |                |
|-----------------------------|----------------|----------------------------|----------------|
| Current Date Parameters     |                | Channel #1                 |                |
| NAME                        | Jun1-2015      | NAME                       | 21             |
| EXPNO                       | 2              | EXPNO                      | 21             |
| PROCNO                      | 1              | PROCNO                     | 1              |
| F2 - Acquisition Parameters |                | F1 - Processing parameters |                |
| Date_                       | 20150612       | Date_                      | 104            |
| Time                        | 15:06:12       | Time                       | 104            |
| INSTRUM                     | 5 mm           | INSTRUM                    | 5 mm           |
| PROBHD                      | 13C CPDOR 13C  | PROBHD                     | 13C CPDOR 13C  |
| PULPROG                     | zgpg30         | PULPROG                    | zgpg30         |
| TD                          | 65536          | TD                         | 65536          |
| SOLVENT                     | CDCl3          | SOLVENT                    | CDCl3          |
| NS                          | 1              | NS                         | 1              |
| DS                          | 8              | DS                         | 8              |
| SWH                         | 561.818 Hz     | SWH                        | 561.818 Hz     |
| FIDRES                      | 2.7743255 Hz   | FIDRES                     | 2.7743255 Hz   |
| AQ                          | 0.1802240 sec  | AQ                         | 0.1802240 sec  |
| RG                          | 327.5          | RG                         | 327.5          |
| DE                          | 80.000 umsc    | DE                         | 80.000 umsc    |
| TE                          | 40.000 umsc    | TE                         | 40.000 umsc    |
| DETECTOR                    | K              | DETECTOR                   | K              |
| DELTA                       | 0.0003260 sec  | DELTA                      | 0.0003260 sec  |
| D1                          | 1.9431356 sec  | D1                         | 1.9431356 sec  |
| D11                         | 0.0000000 sec  | D11                        | 0.0000000 sec  |
| D12                         | 0.0000000 sec  | D12                        | 0.0000000 sec  |
| D13                         | 0.0000000 sec  | D13                        | 0.0000000 sec  |
| D14                         | 0.0000000 sec  | D14                        | 0.0000000 sec  |
| D15                         | 0.0000000 sec  | D15                        | 0.0000000 sec  |
| D16                         | 0.0000000 sec  | D16                        | 0.0000000 sec  |
| D17                         | 0.0001760 sec  | D17                        | 0.0001760 sec  |
| D18                         | 0.0001760 sec  | D18                        | 0.0001760 sec  |
| D19                         | 0.0001760 sec  | D19                        | 0.0001760 sec  |
| CHANNEL #1                  |                | CHANNEL #1                 |                |
| SFO1                        | 101.31222 MHz  | SFO1                       | 101.31222 MHz  |
| NUC1                        | 13C            | NUC1                       | 13C            |
| PC1                         | 9.10 umsc      | PC1                        | 9.10 umsc      |
| PC2                         | 9.10 umsc      | PC2                        | 9.10 umsc      |
| P1                          | 13.25000 umsc  | P1                         | 13.25000 umsc  |
| P2                          | 13.25000 umsc  | P2                         | 13.25000 umsc  |
| PL1                         | 0.0000000 sec  | PL1                        | 0.0000000 sec  |
| PL2                         | 1.9524997 sec  | PL2                        | 1.9524997 sec  |
| GRADIENT CHANNEL            |                | GRADIENT CHANNEL           |                |
| G1                          | 15.000 %       | G1                         | 15.000 %       |
| G2                          | 386.000 %      | G2                         | 386.000 %      |
| GP1                         | 100.00 %       | GP1                        | 100.00 %       |
| GP2                         | 100.00 %       | GP2                        | 100.00 %       |
| F1 - Acquisition parameters |                | F2 - Processing parameters |                |
| FI                          | 128            | FI                         | 128            |
| FD                          | 128            | FD                         | 128            |
| SFO1                        | 500.130156 MHz | SFO1                       | 500.130156 MHz |
| NUC1                        | 13C            | NUC1                       | 13C            |
| PC1                         | 44.713131 ppm  | PC1                        | 44.713131 ppm  |
| PC2                         | 44.713131 ppm  | PC2                        | 44.713131 ppm  |
| PL1                         | 0.0000000 sec  | PL1                        | 0.0000000 sec  |
| PL2                         | 0.0000000 sec  | PL2                        | 0.0000000 sec  |
| PL3                         | 0.0000000 sec  | PL3                        | 0.0000000 sec  |
| PL4                         | 0.0000000 sec  | PL4                        | 0.0000000 sec  |
| PL5                         | 0.0000000 sec  | PL5                        | 0.0000000 sec  |
| PL6                         | 0.0000000 sec  | PL6                        | 0.0000000 sec  |
| PL7                         | 0.0000000 sec  | PL7                        | 0.0000000 sec  |
| PL8                         | 0.0000000 sec  | PL8                        | 0.0000000 sec  |
| PL9                         | 0.0000000 sec  | PL9                        | 0.0000000 sec  |
| PL10                        | 0.0000000 sec  | PL10                       | 0.0000000 sec  |
| PL11                        | 0.0000000 sec  | PL11                       | 0.0000000 sec  |
| PL12                        | 0.0000000 sec  | PL12                       | 0.0000000 sec  |
| PL13                        | 0.0000000 sec  | PL13                       | 0.0000000 sec  |
| PL14                        | 0.0000000 sec  | PL14                       | 0.0000000 sec  |
| PL15                        | 0.0000000 sec  | PL15                       | 0.0000000 sec  |
| PL16                        | 0.0000000 sec  | PL16                       | 0.0000000 sec  |
| PL17                        | 0.0000000 sec  | PL17                       | 0.0000000 sec  |
| PL18                        | 0.0000000 sec  | PL18                       | 0.0000000 sec  |
| PL19                        | 0.0000000 sec  | PL19                       | 0.0000000 sec  |
| PL20                        | 0.0000000 sec  | PL20                       | 0.0000000 sec  |
| PL21                        | 0.0000000 sec  | PL21                       | 0.0000000 sec  |
| PL22                        | 0.0000000 sec  | PL22                       | 0.0000000 sec  |
| PL23                        | 0.0000000 sec  | PL23                       | 0.0000000 sec  |
| PL24                        | 0.0000000 sec  | PL24                       | 0.0000000 sec  |
| PL25                        | 0.0000000 sec  | PL25                       | 0.0000000 sec  |
| PL26                        | 0.0000000 sec  | PL26                       | 0.0000000 sec  |
| PL27                        | 0.0000000 sec  | PL27                       | 0.0000000 sec  |
| PL28                        | 0.0000000 sec  | PL28                       | 0.0000000 sec  |
| PL29                        | 0              |                            |                |

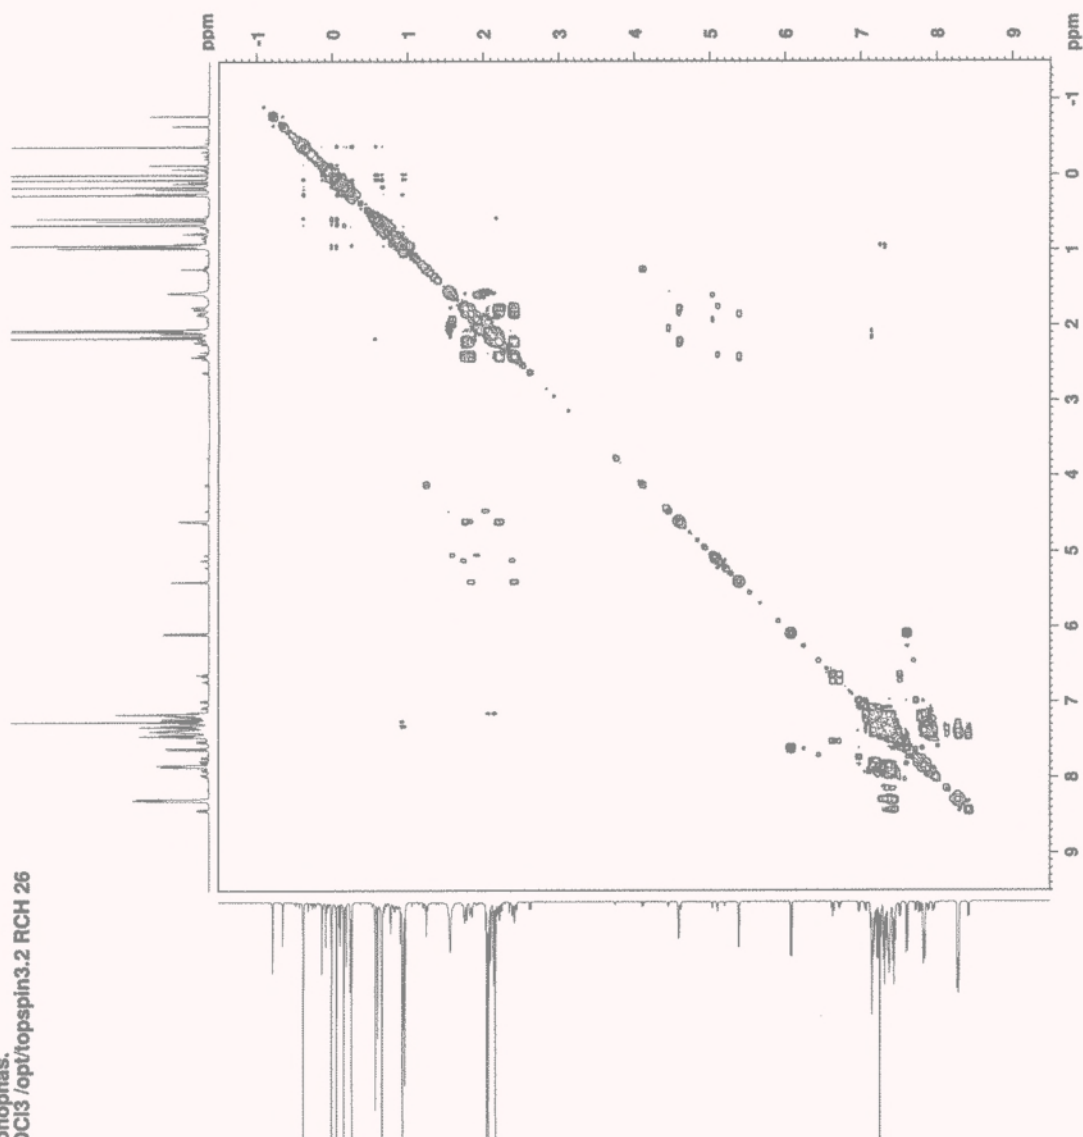

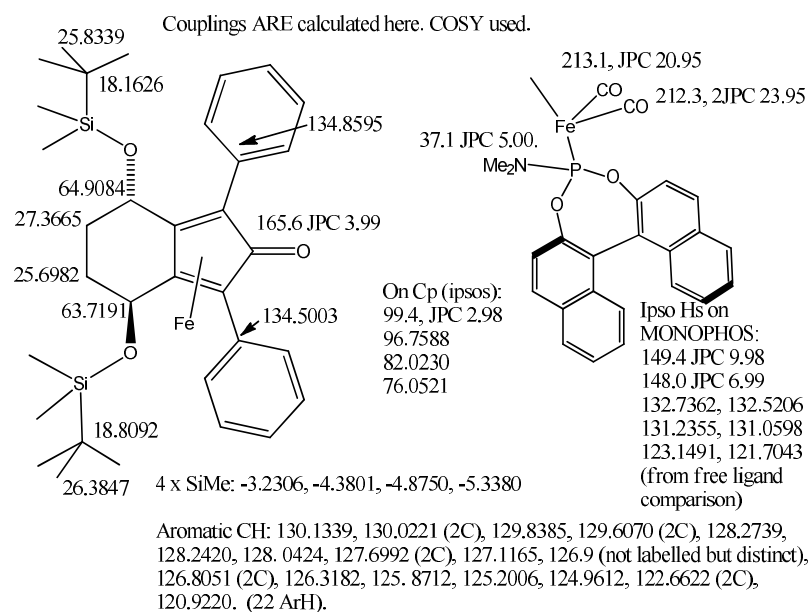

P-NMR.

$\delta_P$  (242 MHz,  $\text{CDCl}_3$ )

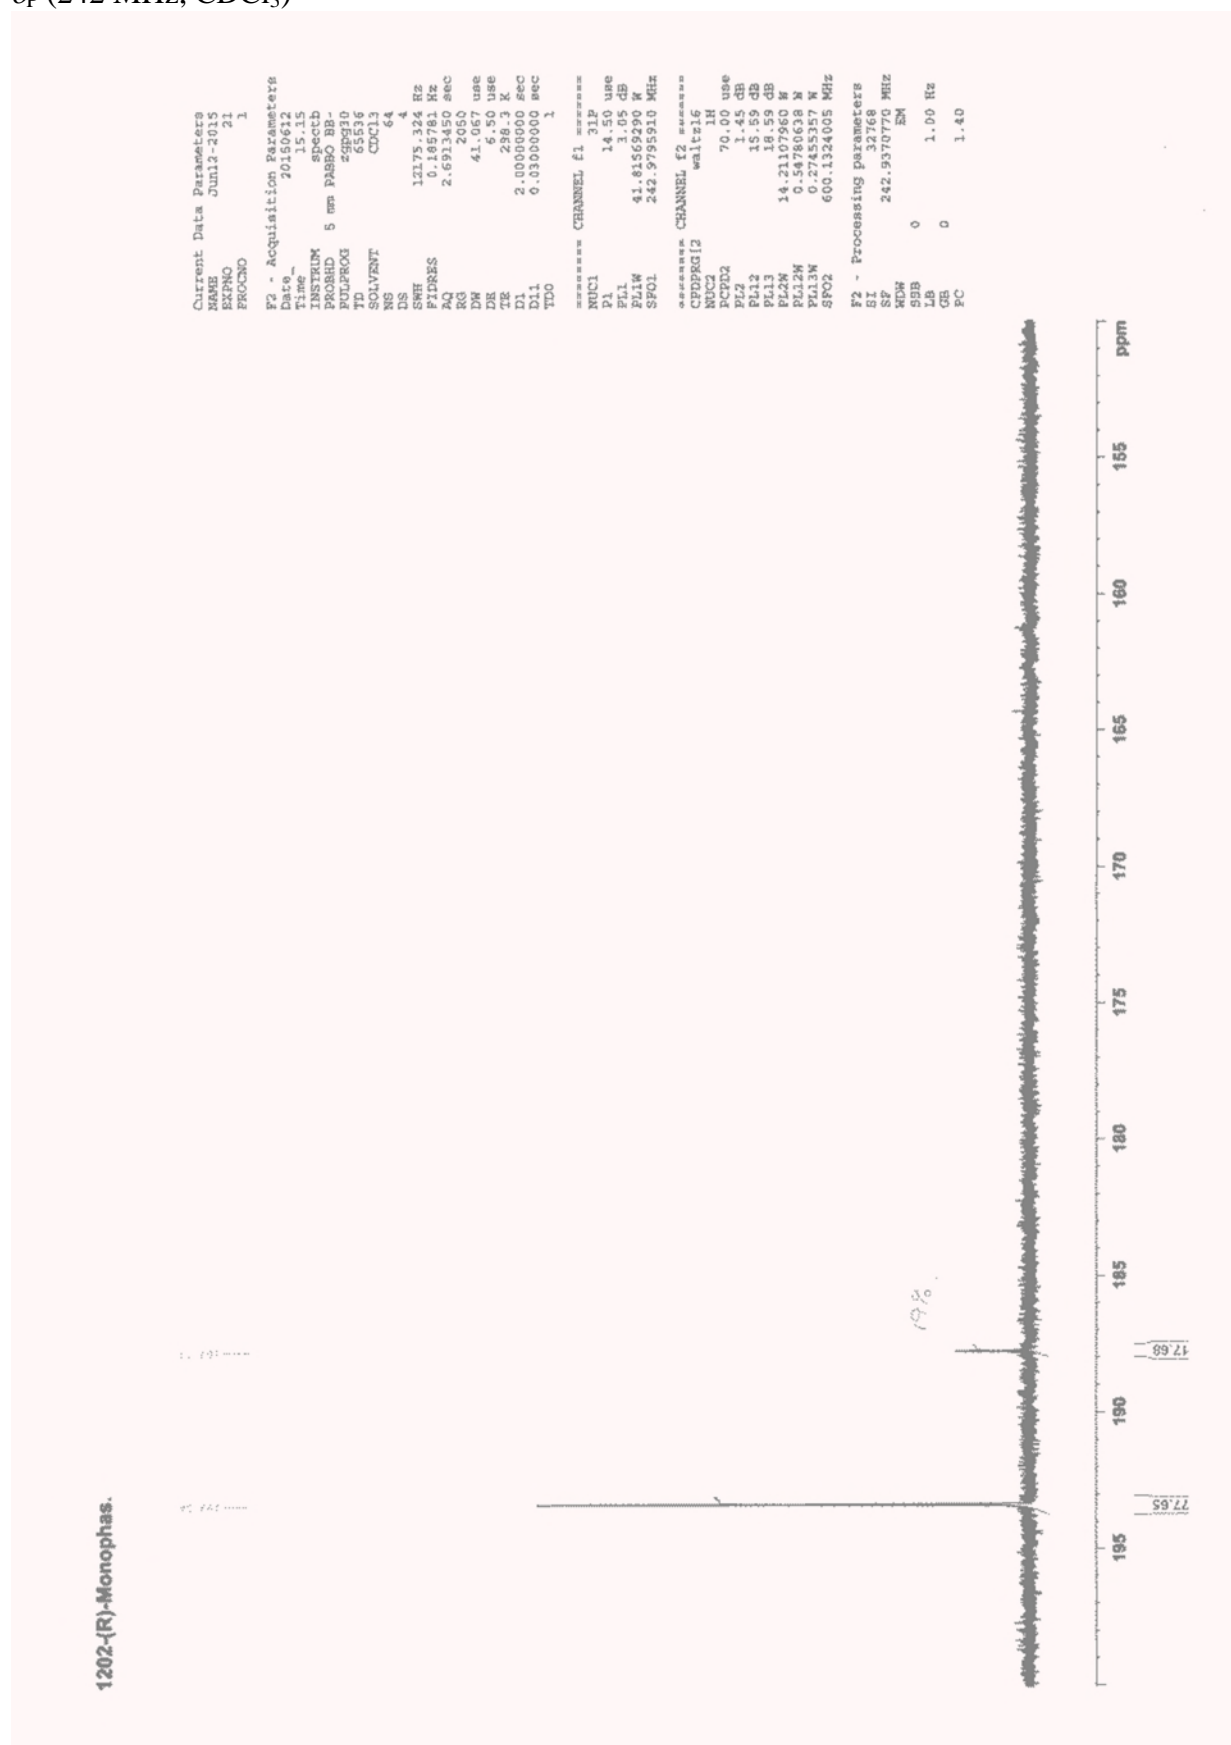

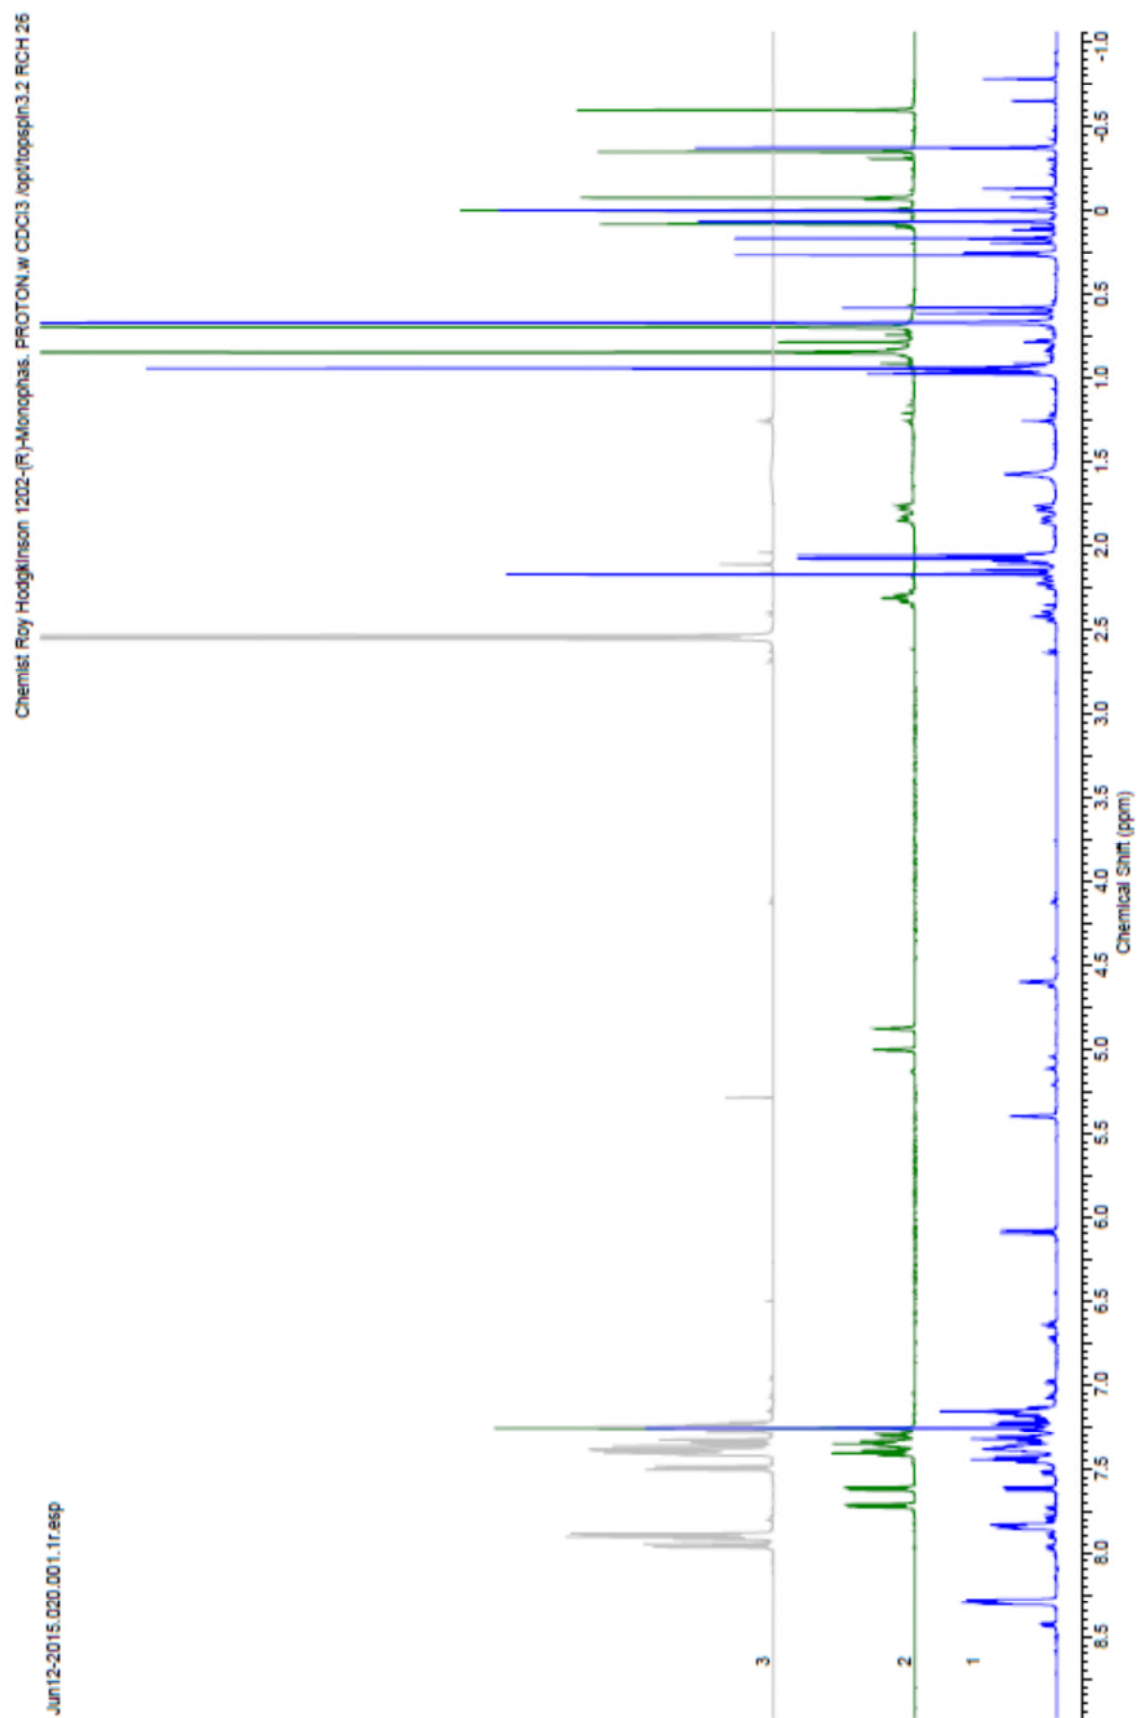

1: OTBS catalyst with R-Monophos; 2: OTBS Catalyst; 3) R-Monophos.

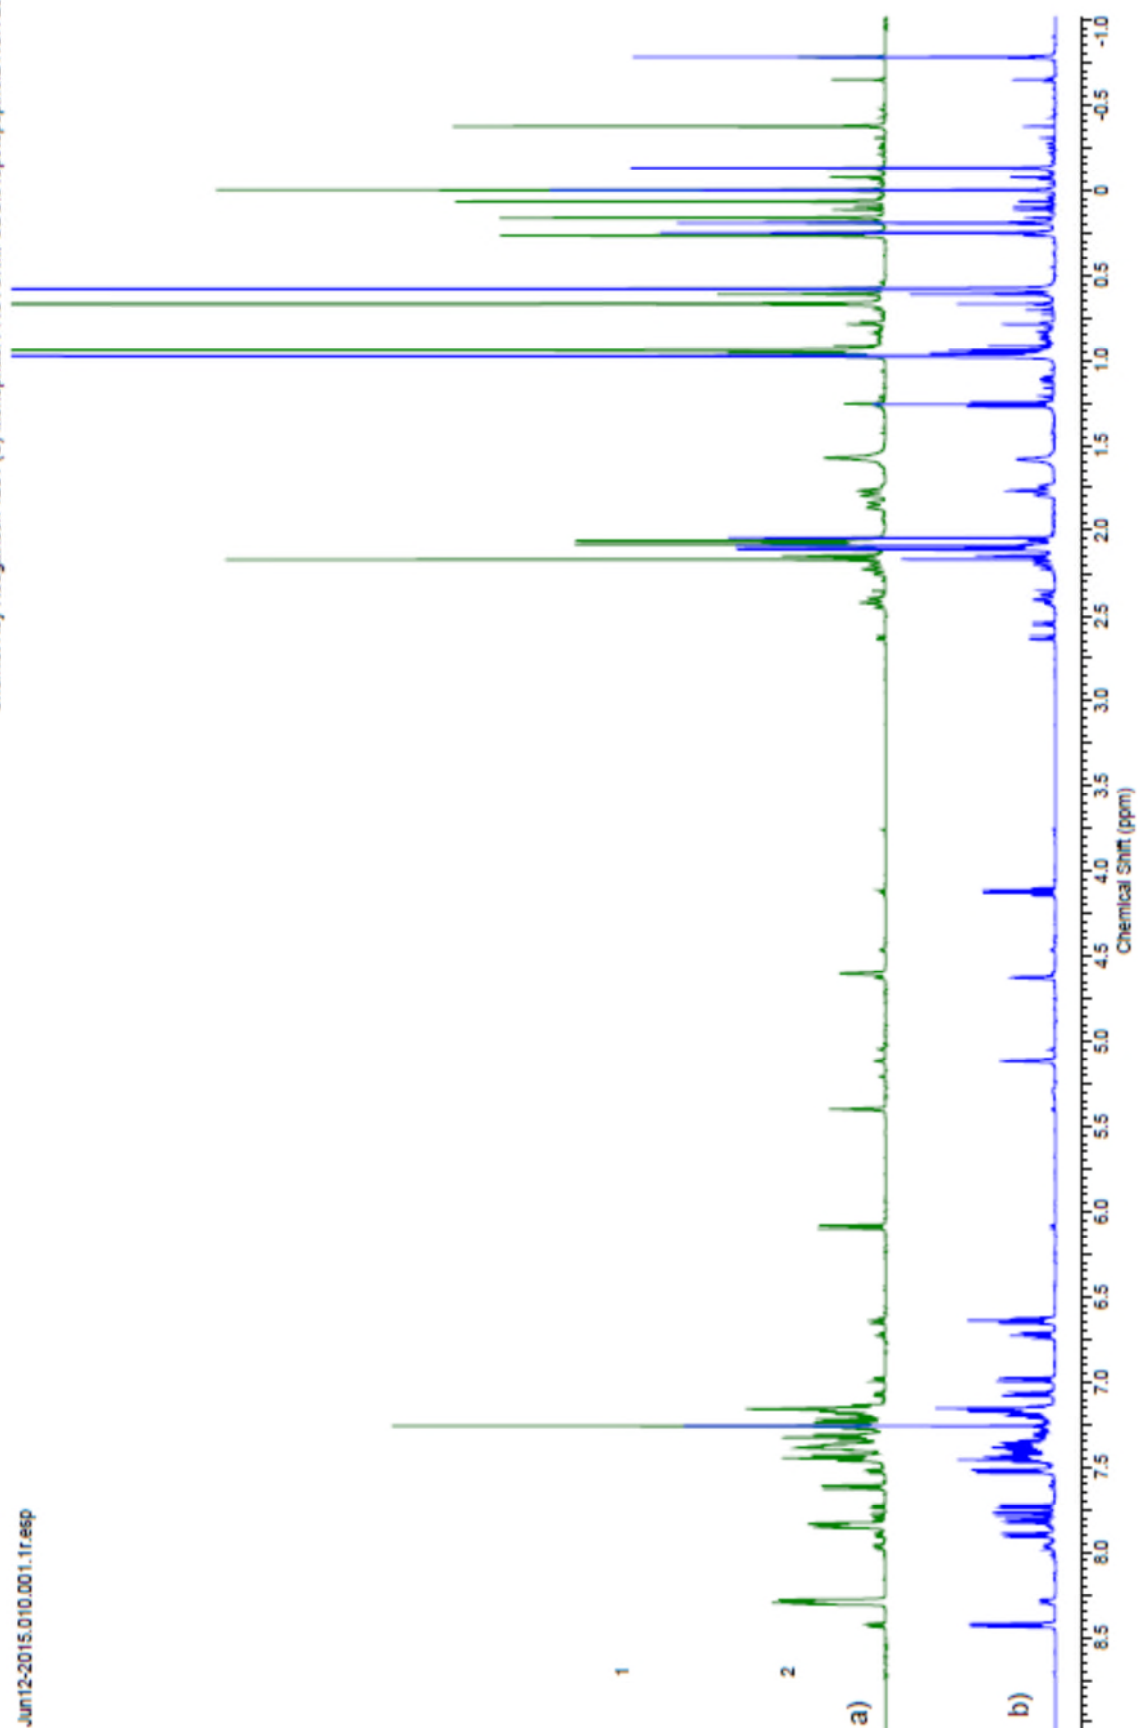

- a) OTBS with R-Monophos **24**; b) OTBS with S-Monophos **25**. Each complex contains ca 10% of the other diastereoisomer, as discussed in the paper.

**GC data for reduction products.**  
**1-Phenylethanol. Racemic, 110 °C.**

05/01/2016 17:32

Chromatogram C:\Clarity\WORK1\DATA\ADG\ADG racemic 1-phenylethanol He.prm

Page 1 of 1

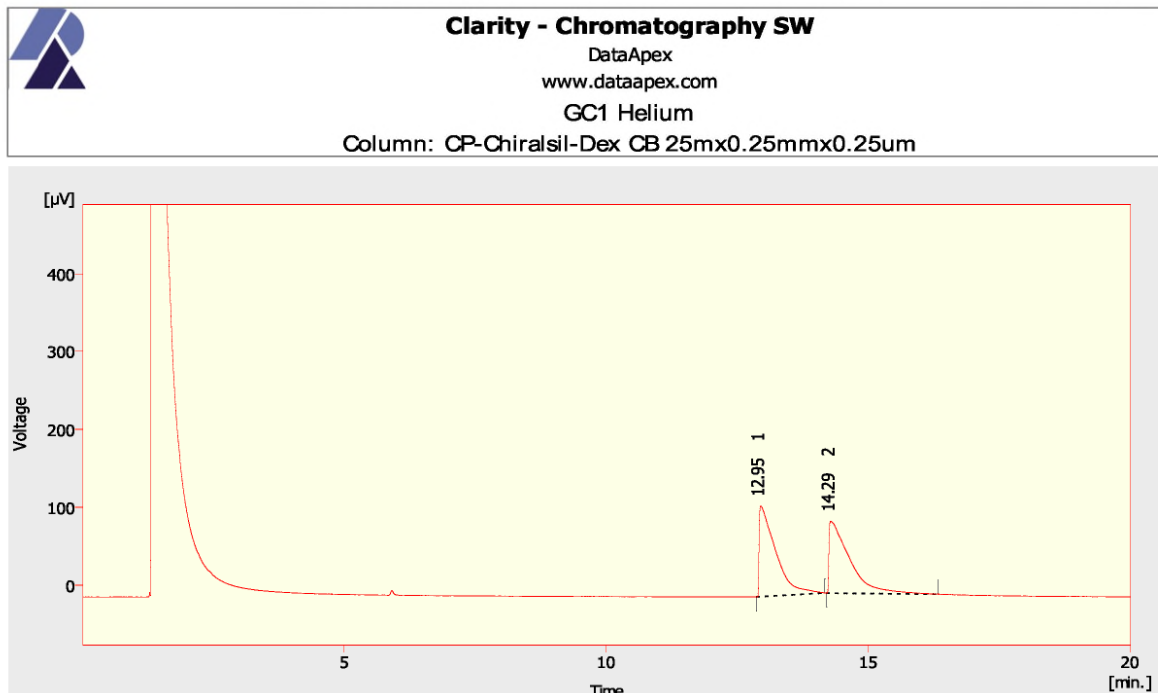

Result Table (Uncal - C:\Clarity\WORK1\DATA\ADG\ADG racemic 1-phenylethanol He - U-PAD2 - 1)

|   | Reten. Time<br>[min] | Area<br>[mV.s] | Height<br>[mV] | Area<br>[%] | Height<br>[%] | W05<br>[min] | Compound<br>Name |
|---|----------------------|----------------|----------------|-------------|---------------|--------------|------------------|
| 1 | 12.952               | 25.289         | 1.160          | 50.0        | 55.7          | 0.33         |                  |
| 2 | 14.292               | 25.295         | 0.924          | 50.0        | 44.3          | 0.40         |                  |
|   | Total                | 50.584         | 2.085          | 100.0       | 100.0         |              |                  |

Chiral (RCH1047, Catalyst OTIPS, 99.2% conversion, 32% ee) 110 °C.

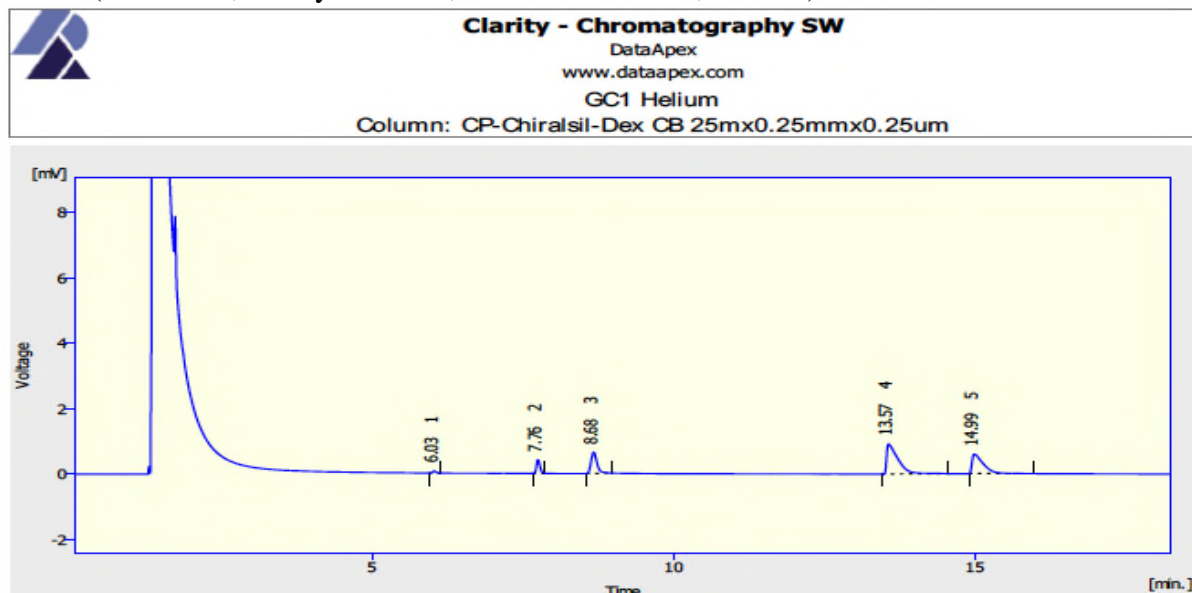

Result Table (Uncal - C:\CLARITY\WORK1\DATA\ROY\RCH1047-24-110 - U-PAD2 - 1)

|   | Reten. Time<br>[min] | Area<br>[mV.s] | Height<br>[mV] | Area<br>[%] | Height<br>[%] | W05<br>[min] | Compound<br>Name |
|---|----------------------|----------------|----------------|-------------|---------------|--------------|------------------|
| 1 | 6.032                | 0.218          | 0.064          | 0.8         | 2.4           | 0.05         |                  |
| 2 | 7.756                | 1.698          | 0.420          | 6.6         | 15.9          | 0.07         |                  |
| 3 | 8.680                | 4.362          | 0.645          | 16.8        | 24.4          | 0.11         |                  |
| 4 | 13.568               | 11.946         | 0.917          | 46.1        | 34.7          | 0.20         |                  |
| 5 | 14.992               | 7.695          | 0.594          | 29.7        | 22.5          | 0.20         |                  |
|   | Total                | 25.920         | 2.639          | 100.0       | 100.0         |              |                  |

1-Phenylethyl formate (racemic) 110 °C.

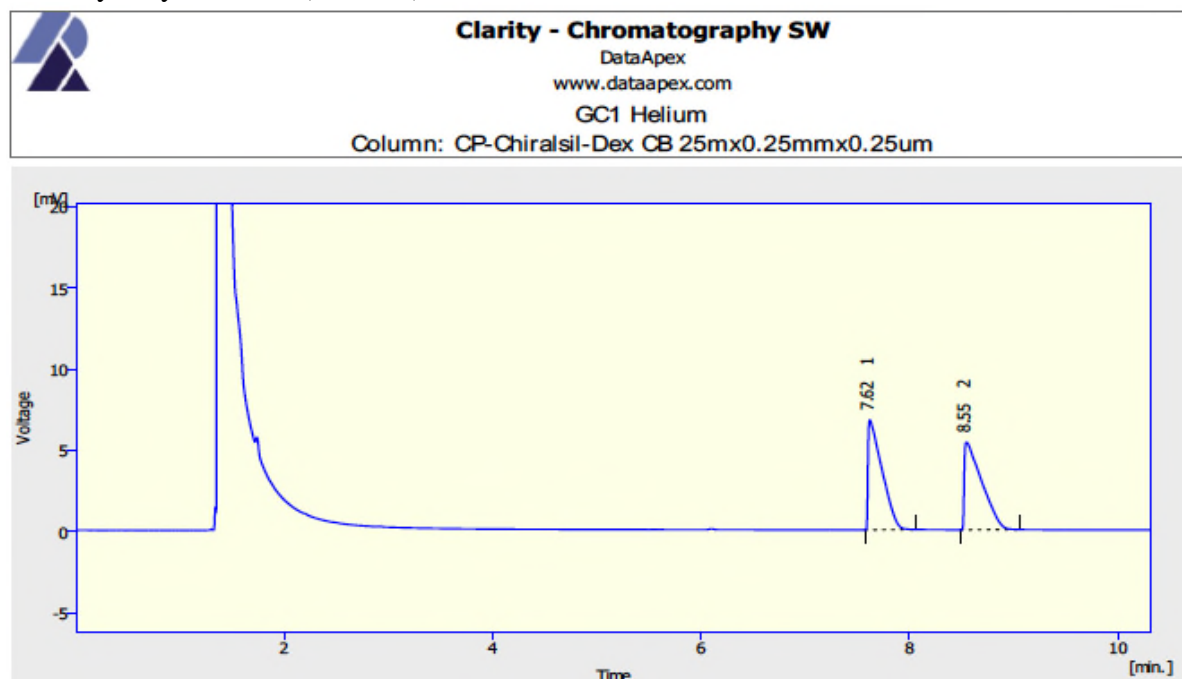

Result Table (Uncal - C:\CLARITY\WORK1\DATA\ROY\CH1074-110 - U-PAD2 - 1)

|   | Reten. Time [min] | Area [mV.s] | Height [mV] | Area [%] | Height [%] | W05 [min] | Compound Name |
|---|-------------------|-------------|-------------|----------|------------|-----------|---------------|
| 1 | 7.620             | 62.779      | 6.773       | 50.0     | 55.7       | 0.15      |               |
| 2 | 8.548             | 62.876      | 5.394       | 50.0     | 44.3       | 0.19      |               |
|   | Total             | 125.654     | 12.167      | 100.0    | 100.0      |           |               |

Enriched sample (51% ee (*S*)) from (*R*) enantiomer of alcohol using Mitsunobu reaction described below) 110 °C.

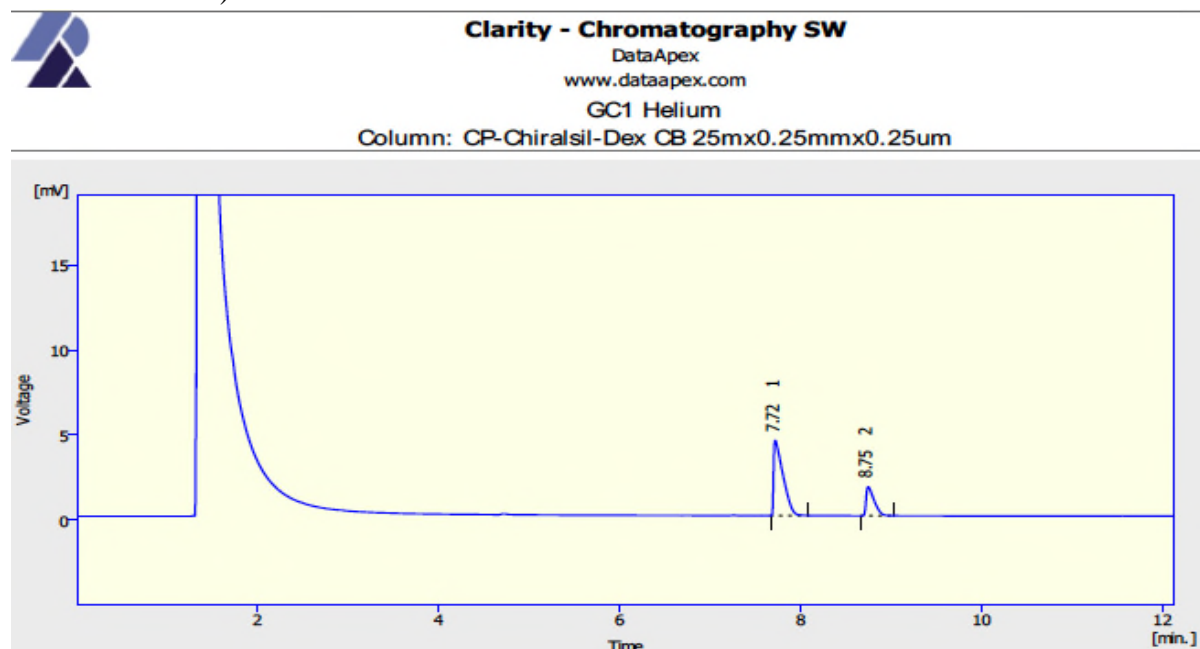

Result Table (Uncal - C:\Clarity\WORK1\DATA\OK\data\CH1136 - U-PAD2 - 1)

|   | Reten. Time [min] | Area [mV.s] | Height [mV] | Area [%] | Height [%] | W05 [min] | Compound Name |
|---|-------------------|-------------|-------------|----------|------------|-----------|---------------|
| 1 | 7.724             | 31.907      | 4.426       | 75.4     | 72.2       | 0.12      |               |
| 2 | 8.748             | 10.433      | 1.707       | 24.6     | 27.8       | 0.10      |               |
|   | Total             | 42.341      | 6.133       | 100.0    | 100.0      |           |               |

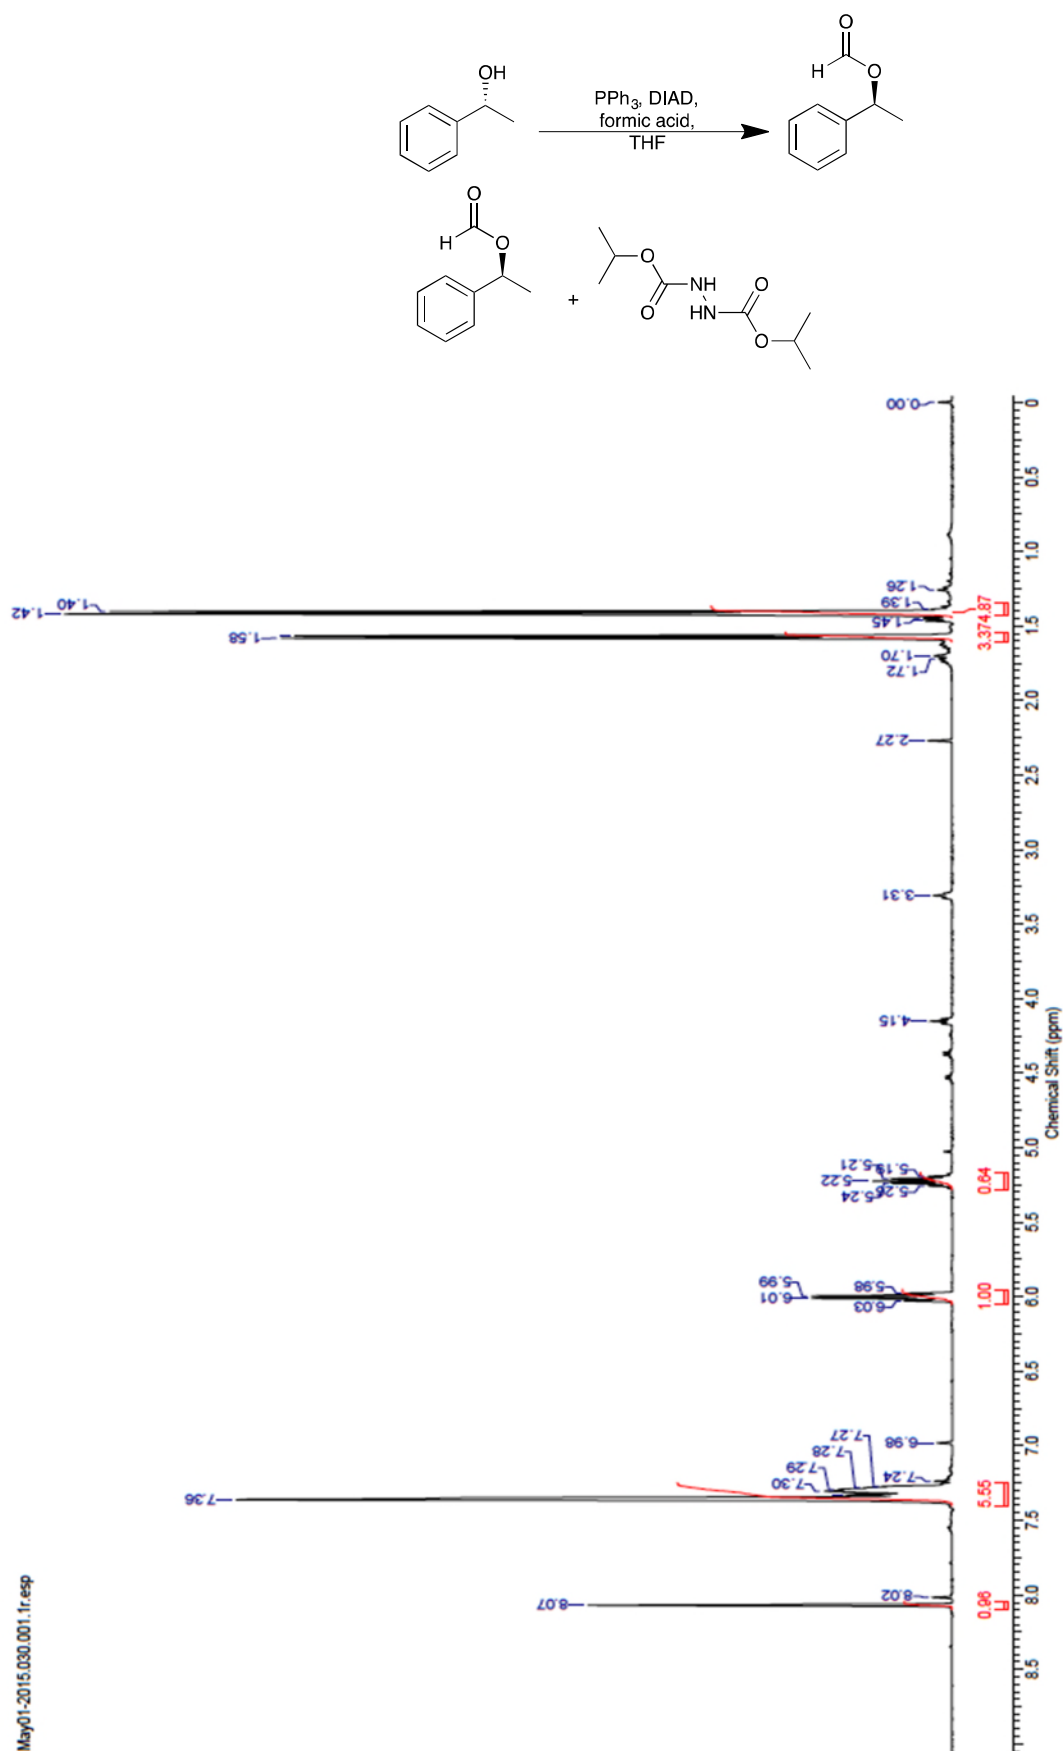



3,3-Dimethyl-2-butanol. 70 °C.  
 Racemic

05/01/2016 17:30

Chromatogram C:\Clarity\WORK1\DATA\ADG\ADG racemic 3,3-dimethyl-2-butanol He ok.prm

Page 1 of 1

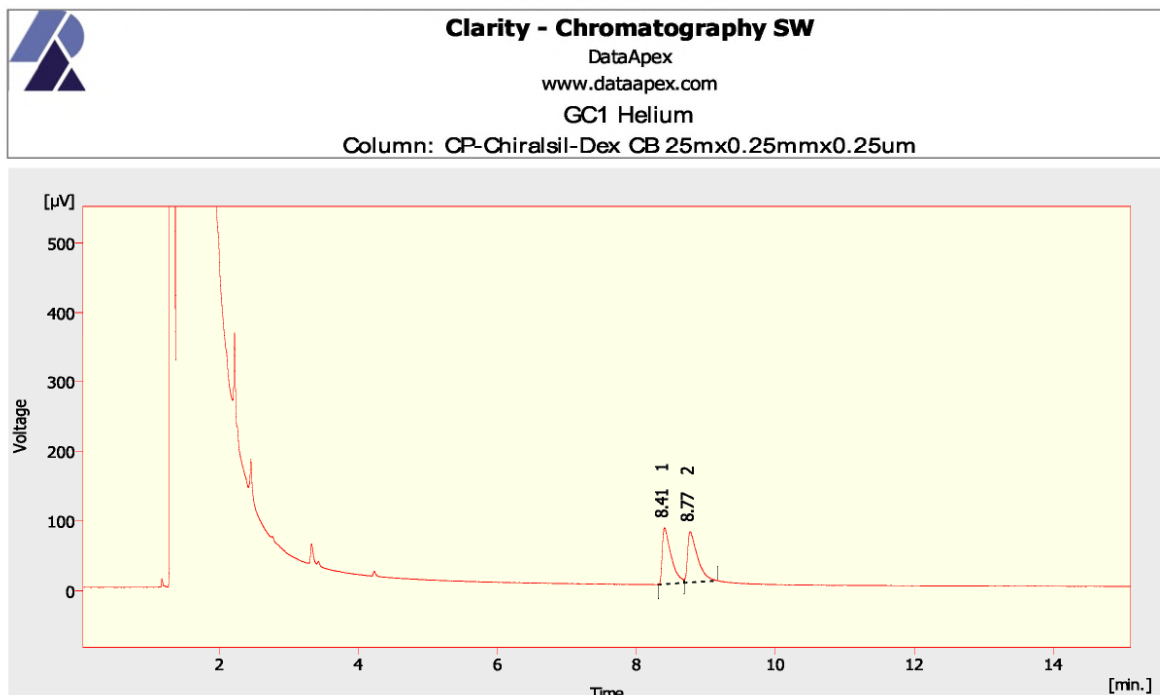

Result Table (Uncal - C:\Clarity\WORK1\DATA\ADG\ADG racemic 3,3-dimethyl-2-butanol He ok - U-PAD2 - 1)

|   | Reten. Time<br>[min] | Area<br>[mV.s] | Height<br>[mV] | Area<br>[%] | Height<br>[%] | W05<br>[min] | Compound<br>Name |
|---|----------------------|----------------|----------------|-------------|---------------|--------------|------------------|
| 1 | 8.408                | 7.123          | 0.808          | 49.6        | 52.6          | 0.14         |                  |
| 2 | 8.772                | 7.241          | 0.729          | 50.4        | 47.4          | 0.15         |                  |
|   | Total                | 14.363         | 1.537          | 100.0       | 100.0         |              |                  |

Chiral (RCH1184-OTBDPS catalyst, 100% conv. With a 26% ee). 70 °C.

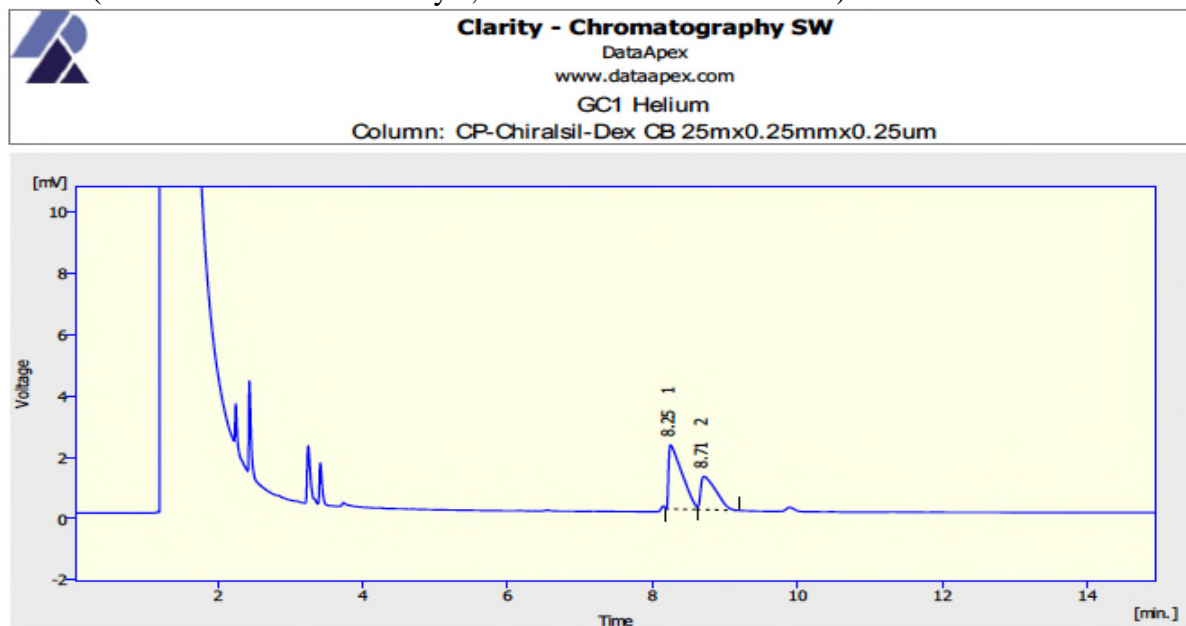

Result Table (Uncal - C:\CLARITY\WORK1\DATA\ROY\RCH1184-24-70 - U-PAD2 - 1)

|   | Reten. Time<br>[min] | Area<br>[mV.s] | Height<br>[mV] | Area<br>[%] | Height<br>[%] | W05<br>[min] | Compound<br>Name |
|---|----------------------|----------------|----------------|-------------|---------------|--------------|------------------|
| 1 | 8.248                | 26.876         | 2.094          | 62.9        | 65.8          | 0.21         |                  |
| 2 | 8.708                | 15.820         | 1.088          | 37.1        | 34.2          | 0.24         |                  |
|   | Total                | 42.696         | 3.182          | 100.0       | 100.0         |              |                  |

The X-ray crystallographic structure of **4b** (CCDC 1431241, local code ADG2).

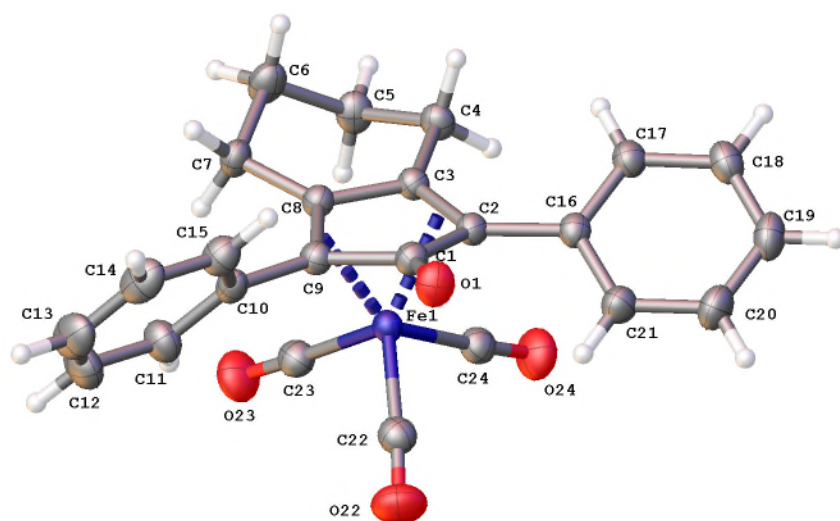

*solid state structure of adg2 with atom labels and thermal ellipsoids at 50% probability level*

Eta4 coordination drawn to the butadiene part C2 C3 C8 C9 as bonds to the centre of the double bonds.

Below, different pictures with different bonding pictures

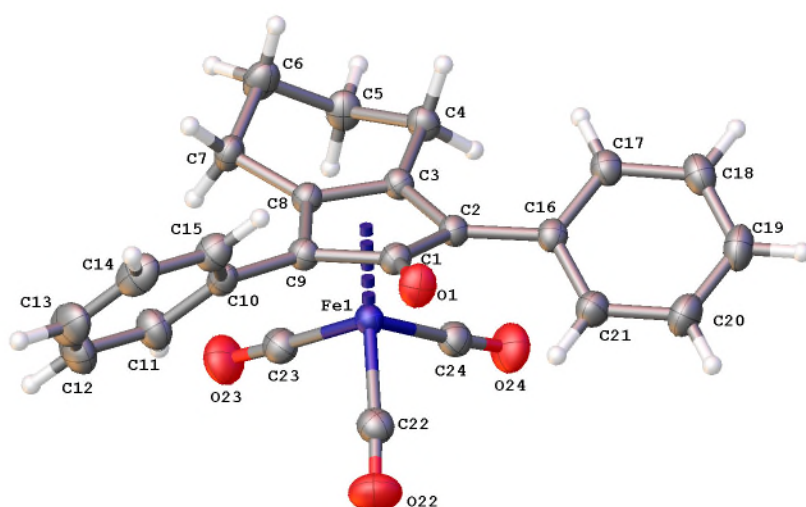

Picture with one bond to the centroid of the butadiene system

### Crystal structure determination of [adg2]

The asymmetric unit contains the complex, there are two complexes in the unit cell. The CP ring is not flat but puckered. The iron appears to bind to just the butadiene fragment and the C=O bond is puckered above the ring plane, indicating expected Eta4 bonding.

## Crystal structure determination of [adg2]

### Experimental

Single crystals of  $C_{24}H_{18}FeO_4$  [adg2] were grown from a solution of hot benzene upon cooling to rt. A suitable crystal was selected and mounted on a glass fibre with Fromblin oil and placed on an Xcalibur Gemini diffractometer with a Ruby CCD area detector. The crystal was kept at 150(2) K during data collection. Using Olex2 [1], the structure was solved with the ShelXT [2] structure solution program using Direct Methods and refined with the ShelXL [3] refinement package using Least Squares minimisation.

- 1 Dolomanov, O.V., Bourhis, L.J., Gildea, R.J, Howard, J.A.K. & Puschmann, H. (2009), J. Appl. Cryst. 42, 339-341.
- 2 Sheldrick, G.M. (2015). Acta Cryst. A71, 3-8.
- 3 Sheldrick, G.M. (2008). Acta Cryst. A64, 112-122.

**Crystal Data** for  $C_{24}H_{18}FeO_4$  ( $M=426.23$  g/mol): triclinic, space group P-1 (no. 2),  $a = 9.12907(18)$  Å,  $b = 9.72040(17)$  Å,  $c = 11.56823(16)$  Å,  $\alpha = 80.5397(13)^\circ$ ,  $\beta = 70.1570(15)^\circ$ ,  $\gamma = 77.6372(16)^\circ$ ,  $V = 938.50(3)$  Å<sup>3</sup>,  $Z = 2$ ,  $T = 150(2)$  K,  $\mu(\text{MoK}\alpha) = 0.833$  mm<sup>-1</sup>,  $D_{\text{calc}} = 1.508$  g/cm<sup>3</sup>, 57661 reflections measured ( $4.814^\circ \leq 2\theta \leq 64.582^\circ$ ), 6365 unique ( $R_{\text{int}} = 0.0336$ ,  $R_{\text{sigma}} = 0.0198$ ) which were used in all calculations. The final  $R_1$  was 0.0317 ( $I > 2\sigma(I)$ ) and  $wR_2$  was 0.1148 (all data).

**Table 1 Crystal data and structure refinement for adg2.**

|                     |                     |
|---------------------|---------------------|
| Identification code | adg2                |
| Empirical formula   | $C_{24}H_{18}FeO_4$ |
| Formula weight      | 426.23              |
| Temperature/K       | 150(2)              |
| Crystal system      | triclinic           |
| Space group         | P-1                 |
| $a/\text{\AA}$      | 9.12907(18)         |
| $b/\text{\AA}$      | 9.72040(17)         |
| $c/\text{\AA}$      | 11.56823(16)        |
| $\alpha/^\circ$     | 80.5397(13)         |

|                                               |                                                                    |
|-----------------------------------------------|--------------------------------------------------------------------|
| $\beta/^\circ$                                | 70.1570(15)                                                        |
| $\gamma/^\circ$                               | 77.6372(16)                                                        |
| Volume/ $\text{\AA}^3$                        | 938.50(3)                                                          |
| Z                                             | 2                                                                  |
| $\rho_{\text{calc}}/\text{g/cm}^3$            | 1.508                                                              |
| $\mu/\text{mm}^{-1}$                          | 0.833                                                              |
| F(000)                                        | 440.0                                                              |
| Crystal size/ $\text{mm}^3$                   | $0.3 \times 0.3 \times 0.25$ yellow block                          |
| Radiation                                     | $\text{MoK}\alpha$ ( $\lambda = 0.71073$ )                         |
| $2\Theta$ range for data collection/ $^\circ$ | 4.814 to 64.582                                                    |
| Index ranges                                  | $-13 \leq h \leq 13$ , $-14 \leq k \leq 13$ , $-17 \leq l \leq 17$ |
| Reflections collected                         | 57661                                                              |
| Independent reflections                       | 6365 [ $R_{\text{int}} = 0.0336$ , $R_{\text{sigma}} = 0.0198$ ]   |
| Data/restraints/parameters                    | 6365/0/262                                                         |
| Goodness-of-fit on $F^2$                      | 1.294                                                              |
| Final R indexes [ $I \geq 2\sigma(I)$ ]       | $R_1 = 0.0317$ , $wR_2 = 0.0973$                                   |
| Final R indexes [all data]                    | $R_1 = 0.0401$ , $wR_2 = 0.1148$                                   |
| Largest diff. peak/hole / $\text{e \AA}^{-3}$ | 0.82/-0.86                                                         |

### Refinement model description

Number of restraints - 0, number of constraints - unknown.

Details:

#### 1. Fixed Uiso

At 1.2 times of: All C(H) groups, All C(H,H) groups

#### 2.a Secondary CH2 refined with riding coordinates:

C4(H4A,H4B), C5(H5A,H5B), C6(H6A,H6B), C7(H7A,H7B)

#### 2.b Aromatic/amide H refined with riding coordinates:

C11(H11), C12(H12), C13(H13), C14(H14), C15(H15), C17(H17), C18(H18),  
C19(H19), C20(H20), C21(H21)

This report has been created with Olex2, compiled on 2015.01.26 svn.r3151 for OlexSys.

The X-ray crystallographic structure of complex (*SS,S*)-**22** (CCDC 1431242, local code RH2).

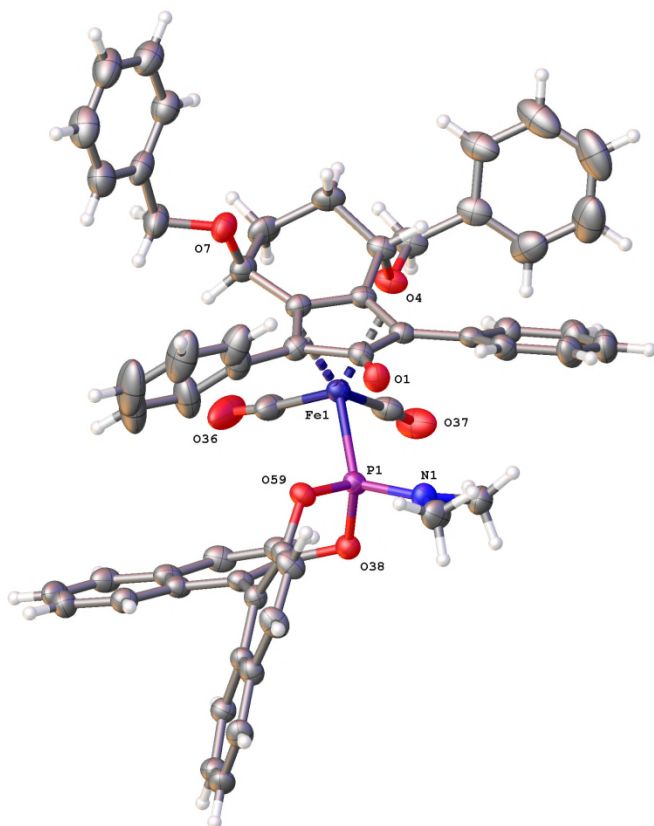

Solid state structure of rh2 with key atoms labeled. Thermal ellipsoids are drawn at 50% probability level.

### Crystal structure determination of [rh2]

The asymmetric unit contains the compound, there are 4 in the unit cell.

Some of the thermal parameters of the benzyl and phenyl groups are rather large indicating some thermal motion but were not modeled as disordered.

The Flack parameter -0.005(1) is small with a small error and the stereochemistry of the refined structure also matches the known stereochemistry of the BINOL starting material (*S*).

Hooft y: -0.0030(11) (Olex2)

Flack x: -0.005(1) (Shelxl2014)

### Experimental

Single crystals of C<sub>59</sub>H<sub>48</sub>FeNO<sub>7</sub>P [**rh2**] were grown from a slowly evaporating solution of

EtOAc at rt. A suitable crystal was selected and mounted on a glass fibre with Fromblin oil and placed on an Xcalibur Gemini diffractometer with a Ruby CCD area detector. The crystal was kept at 150(2) K during data collection. Using Olex2 [1], the structure was solved with the ShelXT [2] structure solution program using Direct Methods and refined with the XL [3] refinement package using Least Squares minimisation.

- 1 Dolomanov, O.V., Bourhis, L.J., Gildea, R.J, Howard, J.A.K. & Puschmann, H. (2009), J. Appl. Cryst. 42, 339-341.
- 2 Sheldrick, G.M. (2015). Acta Cryst. A71, 3-8.
- 3 Sheldrick, G.M. (2008). Acta Cryst. A64, 112-122.

**Crystal Data** for  $C_{59}H_{48}FeNO_7P$  ( $M = 969.80$  g/mol): orthorhombic, space group  $P2_12_12_1$  (no. 19),  $a = 10.35102(7)$  Å,  $b = 19.11081(15)$  Å,  $c = 24.09710(17)$  Å,  $V = 4766.80(6)$  Å<sup>3</sup>,  $Z = 4$ ,  $T = 150(2)$  K,  $\mu(\text{CuK}\alpha) = 3.316$  mm<sup>-1</sup>,  $D_{\text{calc}} = 1.351$  g/cm<sup>3</sup>, 42062 reflections measured ( $7.338^\circ \leq 2\theta \leq 156.204^\circ$ ), 10112 unique ( $R_{\text{int}} = 0.0375$ ,  $R_{\text{sigma}} = 0.0300$ ) which were used in all calculations. The final  $R_1$  was 0.0361 ( $I > 2\sigma(I)$ ) and  $wR_2$  was 0.1006 (all data).

**Table 1 Crystal data and structure refinement for rh2.**

|                                    |                       |
|------------------------------------|-----------------------|
| Identification code                | rh2                   |
| Empirical formula                  | $C_{59}H_{48}FeNO_7P$ |
| Formula weight                     | 969.80                |
| Temperature/K                      | 150(2)                |
| Crystal system                     | orthorhombic          |
| Space group                        | $P2_12_12_1$          |
| $a/\text{\AA}$                     | 10.35102(7)           |
| $b/\text{\AA}$                     | 19.11081(15)          |
| $c/\text{\AA}$                     | 24.09710(17)          |
| $\alpha/^\circ$                    | 90                    |
| $\beta/^\circ$                     | 90                    |
| $\gamma/^\circ$                    | 90                    |
| Volume/Å <sup>3</sup>              | 4766.80(6)            |
| $Z$                                | 4                     |
| $\rho_{\text{calc}}/\text{g/cm}^3$ | 1.351                 |
| $\mu/\text{mm}^{-1}$               | 3.316                 |
| $F(000)$                           | 2024.0                |

|                                             |                                                                |
|---------------------------------------------|----------------------------------------------------------------|
| Crystal size/mm <sup>3</sup>                | 0.3 × 0.2 × 0.18                                               |
| Radiation                                   | CuKα (λ = 1.54184)                                             |
| 2θ range for data collection/°              | 7.338 to 156.204                                               |
| Index ranges                                | -12 ≤ h ≤ 12, -21 ≤ k ≤ 24, -30 ≤ l ≤ 30                       |
| Reflections collected                       | 42062                                                          |
| Independent reflections                     | 10112 [R <sub>int</sub> = 0.0375, R <sub>sigma</sub> = 0.0300] |
| Data/restraints/parameters                  | 10112/84/624                                                   |
| Goodness-of-fit on F <sup>2</sup>           | 1.043                                                          |
| Final R indexes [I>=2σ (I)]                 | R <sub>1</sub> = 0.0361, wR <sub>2</sub> = 0.0977              |
| Final R indexes [all data]                  | R <sub>1</sub> = 0.0390, wR <sub>2</sub> = 0.1006              |
| Largest diff. peak/hole / e Å <sup>-3</sup> | 0.54/-0.36                                                     |
| Flack parameter                             | -0.0050(13)                                                    |

### Refinement model description

Number of restraints - 84, number of constraints - unknown.

Details:

#### 1. Fixed Uiso

At 1.2 times of: All C(H) groups, All C(H,H) groups

At 1.5 times of: All C(H,H,H) groups

#### 2. Uiso/Uanis restraints and constraints

C10 ≈ C15 ≈ C14 ≈ C13 ≈ C12 ≈ C11: within 1.7Å with sigma of 0.004 and sigma for terminal atoms of 0.008

O7 ≈ C29 ≈ C30 ≈ C35 ≈ C34 ≈ C33 ≈ C32 ≈ C31: within 1.7Å with sigma of 0.002 and sigma for terminal atoms of 0.004

#### 3.a Ternary CH refined with riding coordinates: C4(H4), C7(H7)

#### 3.b Secondary CH2 refined with riding coordinates:

C5(H5A,H5B), C6(H6A,H6B), C22(H22A,H22B), C29(H29A,H29B)

#### 3.c Aromatic/amide H refined with riding coordinates:

C11(H11), C12(H12), C13(H13), C14(H14), C15(H15), C17(H17), C18(H18),  
C19(H19), C20(H20), C21(H21), C24(H24), C25(H25), C26(H26), C27(H27), C28(H28),  
C31(H31), C32(H32), C33(H33), C34(H34), C35(H35), C40(H40), C41(H41),  
C43(H43), C44(H44), C45(H45), C46(H46), C51(H51), C52(H52), C53(H53), C54(H54),  
C56(H56), C57(H57)

#### 3.d Idealised Me refined as rotating group: C60(H60A,H60B,H60C),

C61(H61A,H61B,H61C)

This report has been created with Olex2, compiled on 2015.01.26 svn.r3150 for OlexSys.

The X-ray crystallographic structure of complex (SS,R)-**23** (CCDC14311243, local code RH3).

rh3

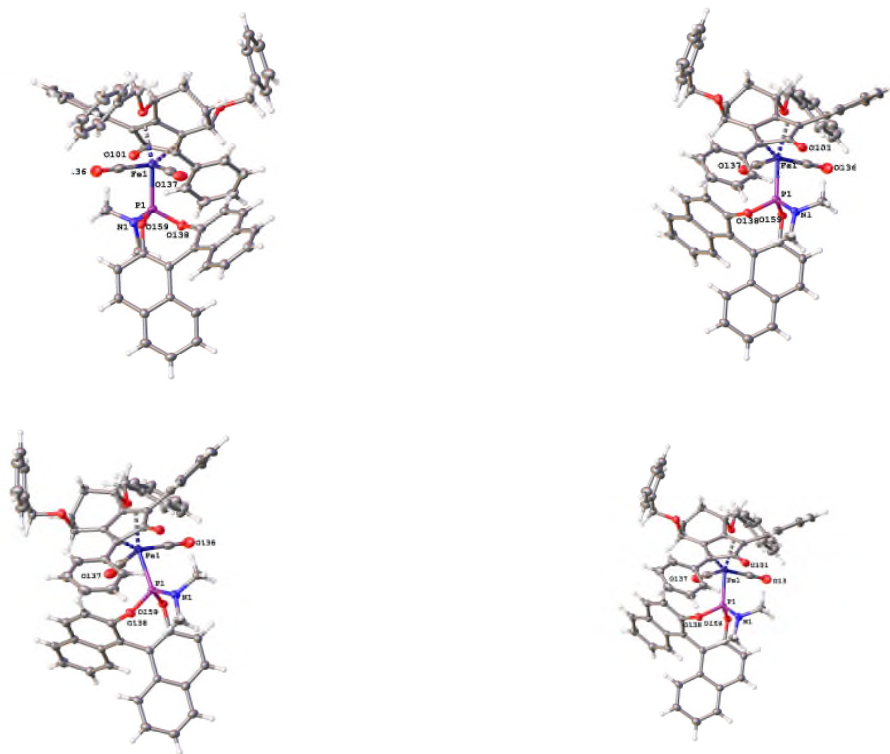

*Just slightly different views of one of the crystallographically independent but chemically equivalent molecules in the asymmetric unit of rh3. Thermal ellipsoids are drawn at 50% probability level and only key atoms are labeled.*

### Crystal structure determination of [rh3]

The asymmetric unit contains two crystallographically independent but chemically identical complexes (see later for an overlay). There are 4 molecules in the unit cell. The crystals were small and weakly diffracting and this registers a C alert in the cif checker.

The Flack parameter -0.017(4) is small with a small error and the stereochemistry of the refined structure also matches the known stereochemistry of the BINOL starting material (*R*).

Hooft y: -0.017(3) (Olex2)

Flack x: -0.017(4) (Shelx 2014)



Below is a picture of an overlay of the two molecules in the asymmetric unit using the 'match' algorithm in Olex2 with the statistics for the fit below that.

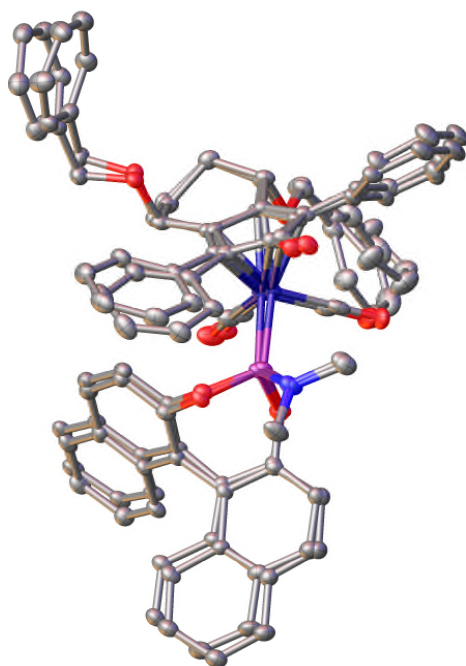

#### Alignment statistics

Alignment RMSD {Fe2,C236,O236,...} to {Fe1,C136,O136,...} without inversion) is 0.468 Å

Alignment RMSD {Fe2,C236,O236,...} to {Fe1,C136,O136,...} with inversion) is 3.758 Å

The statistics show that the molecules are very similar (only a volume of 0.468Å cubed difference between the two structures) the difference being mainly rotations of the aromatic rings and not different stereochemistry.

Attempts to match the second molecule by inverting it (so the enantiomer of the 2nd molecule) has a poor fit (3.758Å cubed out).

The molecules are crystallographically independent but stereochemically identical.

#### Experimental

Single crystals of  $C_{59}H_{48}FeNO_7P$  [**rh3**] were grown from a slowly evaporating solution of EtOAc at rt. A suitable crystal was selected and mounted on a Mitegen head with Fromblin oil and placed on an Xcalibur Gemini diffractometer with a Ruby CCD area detector. The crystal was kept at 150(2) K during data collection. Using Olex2 [1], the structure was solved with the ShelXT [2] structure solution program using Direct Methods and refined with the

XL [3] refinement package using Least Squares minimisation.

- 1 Dolomanov, O.V., Bourhis, L.J., Gildea, R.J, Howard, J.A.K. & Puschmann, H. (2009), J. Appl. Cryst. 42, 339-341.
- 2 Sheldrick, G.M. (2015). Acta Cryst. A71, 3-8.
- 3 Sheldrick, G.M. (2008). Acta Cryst. A64, 112-122.

**Crystal Data** for  $C_{59}H_{48}FeNO_7P$  ( $M = 969.80$  g/mol): monoclinic, space group  $P2_1$  (no. 4),  $a = 8.9958(5)$  Å,  $b = 22.5355(9)$  Å,  $c = 23.3422(15)$  Å,  $\beta = 99.763(6)^\circ$ ,  $V = 4663.5(4)$  Å<sup>3</sup>,  $Z = 4$ ,  $T = 150(2)$  K,  $\mu(\text{CuK}\alpha) = 3.389$  mm<sup>-1</sup>,  $D_{\text{calc}} = 1.381$  g/cm<sup>3</sup>, 50097 reflections measured ( $7.686^\circ \leq 2\Theta \leq 157.392^\circ$ ), 18903 unique ( $R_{\text{int}} = 0.0914$ ,  $R_{\text{sigma}} = 0.1131$ ) which were used in all calculations. The final  $R_1$  was 0.0634 ( $I > 2\sigma(I)$ ) and  $wR_2$  was 0.1964 (all data).

**Table 1 Crystal data and structure refinement for rh3.**

|                                               |                                                                    |
|-----------------------------------------------|--------------------------------------------------------------------|
| Identification code                           | rh3                                                                |
| Empirical formula                             | $C_{59}H_{48}FeNO_7P$                                              |
| Formula weight                                | 969.80                                                             |
| Temperature/K                                 | 150(2)                                                             |
| Crystal system                                | Monoclinic                                                         |
| Space group                                   | $P2_1$                                                             |
| $a/\text{\AA}$                                | 8.9958(5)                                                          |
| $b/\text{\AA}$                                | 22.5355(9)                                                         |
| $c/\text{\AA}$                                | 23.3422(15)                                                        |
| $\alpha/^\circ$                               | 90                                                                 |
| $\beta/^\circ$                                | 99.763(6)                                                          |
| $\gamma/^\circ$                               | 90                                                                 |
| Volume/Å <sup>3</sup>                         | 4663.5(4)                                                          |
| $Z$                                           | 4                                                                  |
| $\rho_{\text{calc}}/\text{g/cm}^3$            | 1.381                                                              |
| $\mu/\text{mm}^{-1}$                          | 3.389                                                              |
| $F(000)$                                      | 2024.0                                                             |
| Crystal size/mm <sup>3</sup>                  | $0.2 \times 0.08 \times 0.06$ orange block                         |
| Radiation                                     | $\text{CuK}\alpha$ ( $\lambda = 1.54184$ )                         |
| $2\Theta$ range for data collection/ $^\circ$ | 7.686 to 157.392                                                   |
| Index ranges                                  | $-11 \leq h \leq 11$ , $-27 \leq k \leq 28$ , $-29 \leq l \leq 29$ |

|                                                |                                                                   |
|------------------------------------------------|-------------------------------------------------------------------|
| Reflections collected                          | 50097                                                             |
| Independent reflections                        | 18903 [ $R_{\text{int}} = 0.0914$ , $R_{\text{sigma}} = 0.1131$ ] |
| Data/restraints/parameters                     | 18903/1/1247                                                      |
| Goodness-of-fit on $F^2$                       | 1.008                                                             |
| Final R indexes [ $I \geq 2\sigma(I)$ ]        | $R_1 = 0.0634$ , $wR_2 = 0.1614$                                  |
| Final R indexes [all data]                     | $R_1 = 0.0962$ , $wR_2 = 0.1964$                                  |
| Largest diff. peak/hole / $e \text{ \AA}^{-3}$ | 0.43/-0.94                                                        |
| Flack parameter                                | -0.010(4)                                                         |

### Refinement model description

Number of restraints - 1, number of constraints - unknown.

Details:

#### 1. Fixed Uiso

At 1.2 times of: All C(H) groups, All C(H,H) groups

At 1.5 times of: All C(H,H,H) groups

2.a Ternary CH refined with riding coordinates: C104(H104), C107(H107), C204(H204), C207(H207)

2.b Secondary CH<sub>2</sub> refined with riding coordinates: C105(H10A,H10B), C106(H10C,H10D), C122(H12A,H12B), C129(H12C,H12D), C205(H20A, H20B), C206(H20C,H20D), C222(H22A,H22B), C229(H22C,H22D)

2.c Aromatic/amide H refined with riding coordinates: C111(H111), C112(H112), C113(H113), C114(H114), C115(H115), C117(H117), C118(H118), C119(H119), C120(H120), C121(H121), C124(H124), C125(H125), C126(H126), C127(H127), C128(H128), C131(H131), C132(H132), C133(H133), C134(H134), C135(H135), C140(H140), C141(H141), C143(H143), C144(H144), C145(H145), C146(H146), C151(H151), C152(H152), C153(H153), C154(H154), C156(H156), C157(H157), C211(H211), C212(H212), C213(H213), C214(H214), C215(H215), C217(H217), C218(H218), C219(H219), C220(H220), C221(H221), C224(H224), C225(H225), C226(H226), C227(H227), C228(H228), C231(H231), C232(H232), C233(H233), C234(H234), C235(H235), C240(H240), C241(H241), C243(H243), C244(H244), C245(H245), C246(H246), C251(H251), C252(H252), C253(H253), C254(H254), C256(H256), C257(H257)

2.d Idealised Me refined as rotating group;

C160(H16A,H16B,H16C),C161(H16D,H16E,H16F), C260(H26A,H26B,H26C),

C261(H26D, H26E,H26F)

This report has been created with Olex2, compiled on 2015.01.26 svn.r3151 for OlexSys.
